# Supplementary material for: Origin of Optoelectronic Contradictions in 3,4-Cycloalkyl[c]-chalcogenophenes: A Computational Study
Source: MDPI journal article supplement (doi:10.3390/polym15214240), 2023-10-27
Supplement: s1 [file s1]

## Supporting information

### Origin of Optoelectronic Contradictions in 3,4-Cycloalkyl[c]-chalcogenophenes: A Computational Study

Ganesh Masilamani <sup>1</sup>, Gamidi Rama Krishna <sup>2,\*</sup>, Sashi Debnath <sup>3,\*</sup> and Anjan Bedi <sup>1,\*</sup>

- 1 Department of Chemistry, SRM Institute of Science and Technology, Kattankulathur, Chennai 603203, India
- 2 Organic Chemistry Division, CSIR-National Chemical Laboratory, Pune 411008, India
- 3 Department of Radiology, University of Texas Southwestern Medical Center, Dallas, TX 75390, USA

#### Contents

|                                                                                                                                                                                              |    |
|----------------------------------------------------------------------------------------------------------------------------------------------------------------------------------------------|----|
| Table S1. Parameters of (5,5-bis(methoxymethyl)-5,6-dihydro-4H-cyclopenta[c]thiophene -1,3-diyl)bis(trimethylsilane) obtained from the single crystal X-ray diffraction (SCXRD) technique... | 3  |
| Optimized structures .....                                                                                                                                                                   | 6  |
| Table S2. Optimized geometry of the (5,5-bis(methoxymethyl)-5,6-dihydro-4H-cyclopenta[c]thiophene-1,3-diyl)bis(trimethylsilane) .....                                                        | 6  |
| Table S3. Optimized geometry of the Chalcogenophene oligomer of CHXs and CPXs.....                                                                                                           | 6  |
| Table S4. Optimized geometry of the oligomer and polymers of CHS and CPS .....                                                                                                               | 7  |
| Table S5. Optimized geometry of the oligomer and polymers of CHSe and CPSe.....                                                                                                              | 8  |
| Table S6. Optimized geometry of the oligomer and polymers of CHTe and CPTe .....                                                                                                             | 9  |
| Computationally (TDDFT-B3LYP-SDD) obtained gas-phase UV-vis spectra .....                                                                                                                    | 10 |
| Figure S3. Gas phase UV-vis spectra of the (a) CPO and (b) CHO .....                                                                                                                         | 10 |
| Figure S4. Gas phase UV-vis spectra of the (a) CPS and (b) CHS .....                                                                                                                         | 10 |
| Figure S5. Gas phase UV-vis spectra of the (a) CPSe and (b) CHSe.....                                                                                                                        | 10 |
| Figure S6. Gas phase UV-vis spectra of the (a) CPTe and (b) CHTe .....                                                                                                                       | 11 |
| Orbital Contributions .....                                                                                                                                                                  | 11 |
| Table S7. Orbital Contribution of (5,5-bis(methoxymethyl)-5,6-dihydro-4H-cyclopenta[c]thiophene-1,3-diyl)bis(trimethylsilane) .....                                                          | 11 |
| Table S8. Orbital contribution of electronic transitions in chalcogenophene.....                                                                                                             | 11 |
| Table S9. Orbital contribution of electronic transitions in CPX .....                                                                                                                        | 12 |

|                                                                                                                                                    |     |
|----------------------------------------------------------------------------------------------------------------------------------------------------|-----|
| <b>Table S10.</b> Orbital contribution of electronic transitions in <b>2CPX</b> .....                                                              | 12  |
| <b>Table S11.</b> Orbital contribution of electronic transitions in <b>3CPX</b> .....                                                              | 12  |
| <b>Table S12.</b> Orbital contribution of electronic transitions in <b>4CPX</b> .....                                                              | 13  |
| <b>Table S13.</b> Orbital contribution of electronic transitions in <b>5CPX</b> .....                                                              | 13  |
| <b>Table S14.</b> Orbital contribution of electronic transitions in <b>6CPX</b> .....                                                              | 13  |
| <b>Table S15.</b> Orbital contribution of electronic transitions in <b>CHX</b> .....                                                               | 13  |
| <b>Table S16.</b> Orbital contribution of electronic transitions in <b>2CHX</b> .....                                                              | 14  |
| <b>Table S17.</b> Orbital contribution of electronic transitions in <b>3CHX</b> .....                                                              | 14  |
| <b>Table S18.</b> Orbital contribution of electronic transitions in <b>4CHX</b> .....                                                              | 14  |
| <b>Table S19.</b> Orbital contribution of electronic transitions in <b>5CHX</b> .....                                                              | 15  |
| <b>Table S20.</b> Orbital contribution of electronic transitions in <b>6CHX</b> .....                                                              | 15  |
| <b>Optimized Energy (Hartree)</b> .....                                                                                                            | 15  |
| <b>Table S21.</b> Energy of the optimized <b>(5,5-bis(methoxymethyl)-5,6-dihydro-4H-cyclopenta[c]thiophene-1,3-diyl)bis(trimethylsilane)</b> ..... | 15  |
| <b>Table S22.</b> Energy of the optimized chalcogenophene.....                                                                                     | 16  |
| <b>Table S23.</b> Energy of the optimized <b>CPX</b> .....                                                                                         | 16  |
| <b>Table S24.</b> Energy of the optimized <b>2CPX</b> .....                                                                                        | 16  |
| <b>Table S25.</b> Energy of the optimized <b>3CPX</b> .....                                                                                        | 16  |
| <b>Table S26.</b> Energy of the optimized <b>4CPX</b> .....                                                                                        | 17  |
| <b>Table S27.</b> Energy of the optimized <b>5CPX</b> .....                                                                                        | 17  |
| <b>Table S28.</b> Energy of the optimized <b>6CPX</b> .....                                                                                        | 17  |
| <b>Table S29.</b> Energy of the optimized <b>PCPXs</b> .....                                                                                       | 17  |
| <b>Table S30.</b> Energy of the optimized <b>CHXs</b> .....                                                                                        | 18  |
| <b>Table S31.</b> Energy of the optimized <b>2CHXs</b> .....                                                                                       | 18  |
| <b>Table S32.</b> Energy of the optimized <b>3CHXs</b> .....                                                                                       | 18  |
| <b>Table S33.</b> Energy of the optimized <b>4CHXs</b> .....                                                                                       | 18  |
| <b>Table S34.</b> Energy of the optimized <b>5CHXs</b> .....                                                                                       | 19  |
| <b>Table S35.</b> Energy of the optimized <b>6CHXs</b> .....                                                                                       | 19  |
| <b>Table S36.</b> Energy of the optimized <b>PCHXs</b> .....                                                                                       | 19  |
| <b>Table S37.</b> Harmonic frequency of the optimized <b>6CHTe</b> .....                                                                           | 19  |
| <b>Optimized coordinates of the molecules</b> .....                                                                                                | 26  |
| <b>Checkcif report provided by IUCr</b> .....                                                                                                      | 147 |

**Table S1.** Parameters of (5,5-bis(methoxymethyl)-5,6-dihydro-4H-cyclopenta[c]thiophene-1,3-diyl)bis(trimethylsilane) obtained from the single crystal X-ray diffraction (SCXRD) technique

|                                                   |                                                                   |
|---------------------------------------------------|-------------------------------------------------------------------|
| <b>Empirical formula</b>                          | C <sub>17</sub> H <sub>32</sub> O <sub>2</sub> SSi <sub>2</sub>   |
| <b>Formula weight</b>                             | 356.6708                                                          |
| <b>Temperature/K</b>                              | 296(2)                                                            |
| <b>Crystal system</b>                             | triclinic                                                         |
| <b>Space group</b>                                | P-1                                                               |
| <b>a/Å</b>                                        | 6.0030(4)                                                         |
| <b>b/Å</b>                                        | 13.0295(10)                                                       |
| <b>c/Å</b>                                        | 13.9564(10)                                                       |
| <b>α/°</b>                                        | 101.251(4)                                                        |
| <b>β/°</b>                                        | 92.850(4)                                                         |
| <b>γ/°</b>                                        | 91.986(4)                                                         |
| <b>Volume/Å<sup>3</sup></b>                       | 1068.21(13)                                                       |
| <b>Z</b>                                          | 2                                                                 |
| <b>ρ<sub>calc</sub>/g/cm<sup>3</sup></b>          | 1.109                                                             |
| <b>μ/mm<sup>-1</sup></b>                          | 0.268                                                             |
| <b>F(000)</b>                                     | 388                                                               |
| <b>Crystal size/mm<sup>3</sup></b>                | 0.44 x 0.32 x 0.23                                                |
| <b>Radiation</b>                                  | Mo Kα (λ = 0.71073)                                               |
| <b>2θ range for data collection/°</b>             |                                                                   |
| <b>Index ranges</b>                               | -7 ≤ h ≤ 6, -15 ≤ k ≤ 15,<br>-16 ≤ l ≤ 16                         |
| <b>Reflections collected</b>                      | 3764                                                              |
| <b>Independent reflections</b>                    | 16158 [R <sub>int</sub> = 0.0481,<br>R <sub>sigma</sub> = 0.0414] |
| <b>Data/restraints/parameters</b>                 | 3764/0/207                                                        |
| <b>Goodness-of-fit on F<sup>2</sup></b>           | 1.311                                                             |
| <b>Final R indexes [I ≥ 2σ (I)]</b>               | R <sub>1</sub> = 0.0720, wR <sub>2</sub> = 0.2057                 |
| <b>Final R indexes [all data]</b>                 | R <sub>1</sub> = 0.0855, wR <sub>2</sub> = 0.2104                 |
| <b>Largest diff. peak/hole / e Å<sup>-3</sup></b> | 0.390/-0.372                                                      |
| <b>CCDC number</b>                                | 2249392                                                           |

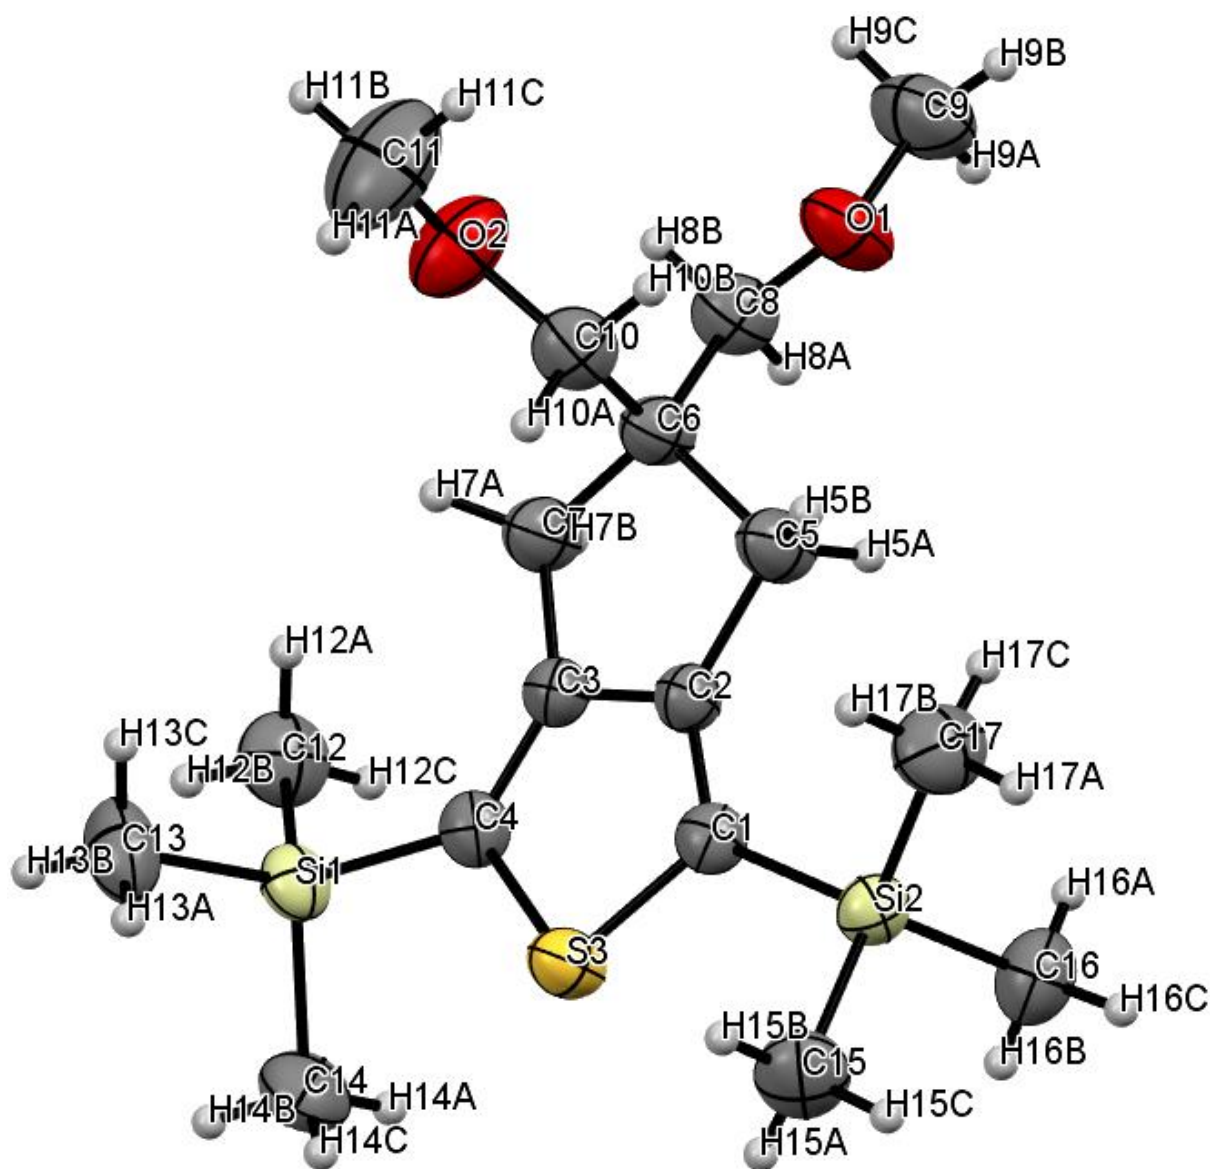

**Figure S1.** (a) ORTEP representation of (5,5-bis(methoxymethyl)-5,6-dihydro-4H-cyclopenta[c]thiophene-1,3-diyl)bis(trimethylsilane), drawn at 50% probability level.

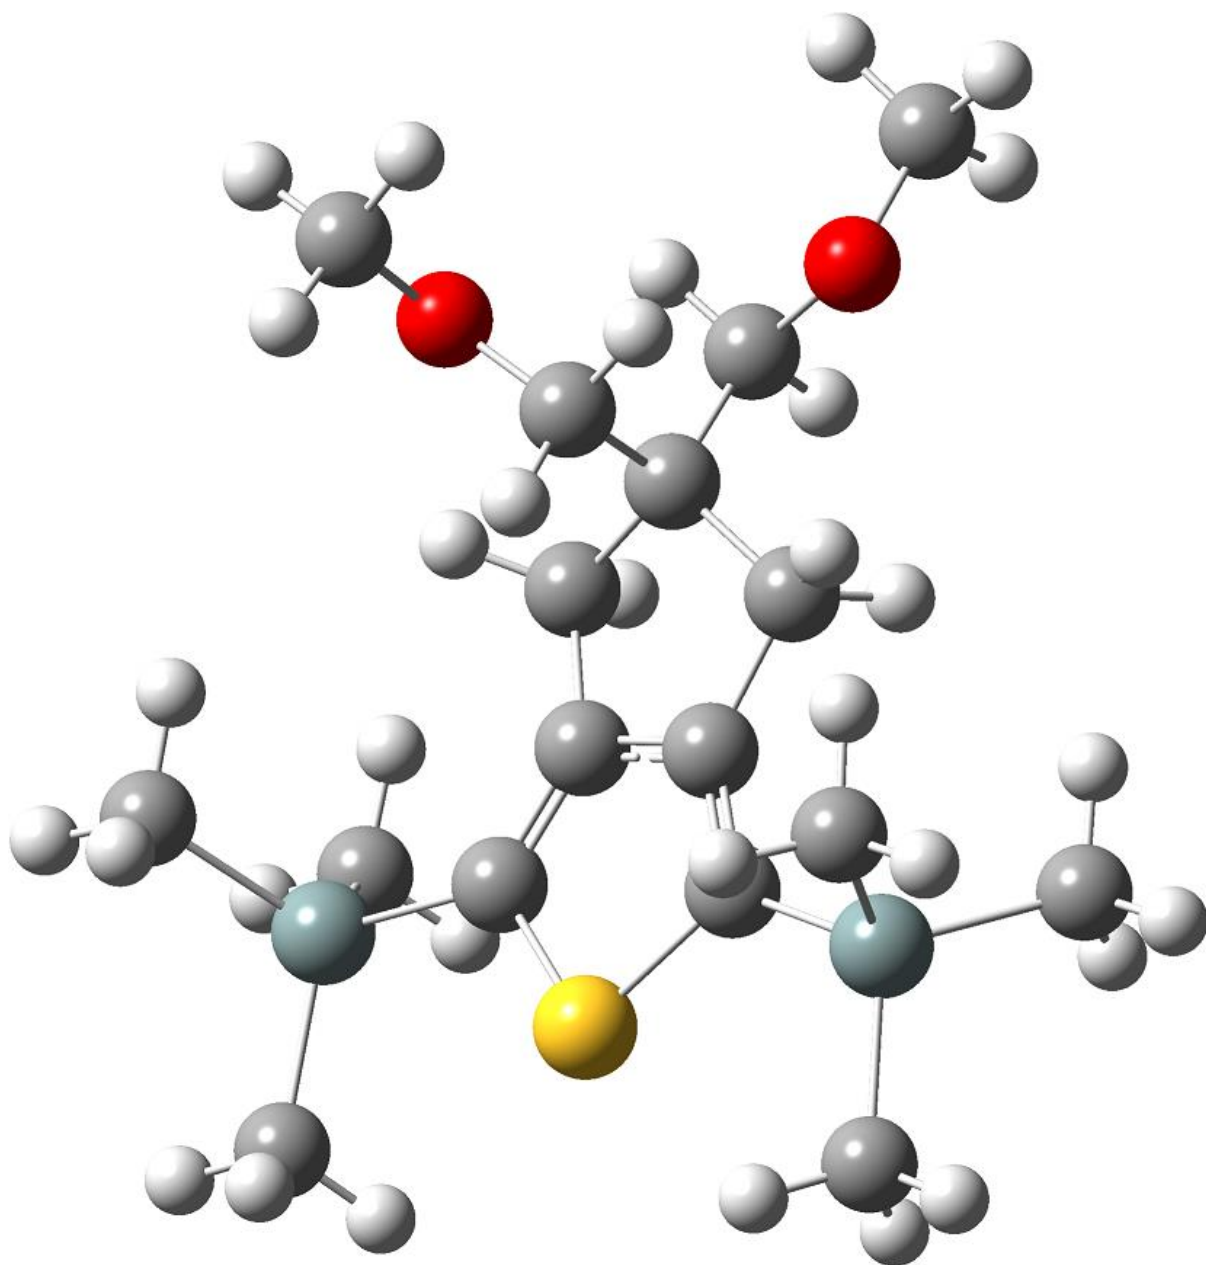

**Figure S2.** Optimized geometry (DFT-B3LYP-SDD) of (5,5-bis(methoxymethyl)-5,6-dihydro-4H-cyclopenta[c]thiophene-1,3-diyl)bis(trimethylsilane).

## Optimized structures

**Table S2.** Optimized geometry of the (5,5-bis(methoxymethyl)-5,6-dihydro-4H-cyclopenta[c]thiophene-1,3-diyl)bis(trimethylsilane)

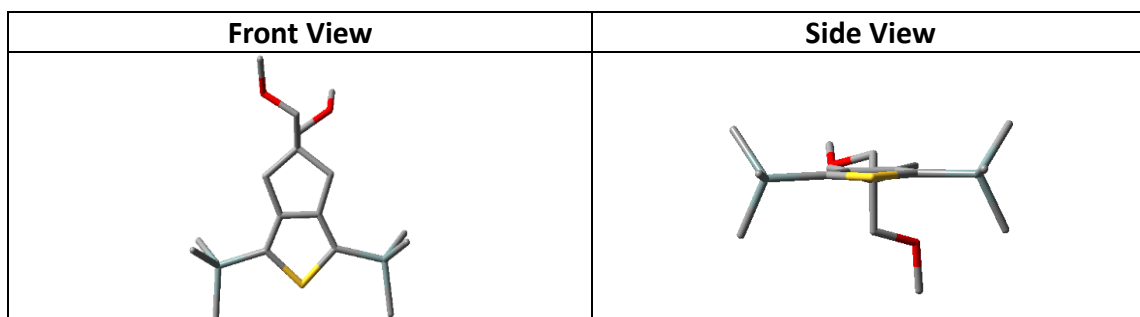

**Table S3.** Optimized geometry of the Chalcogenophene oligomer of CHXs and CPXs

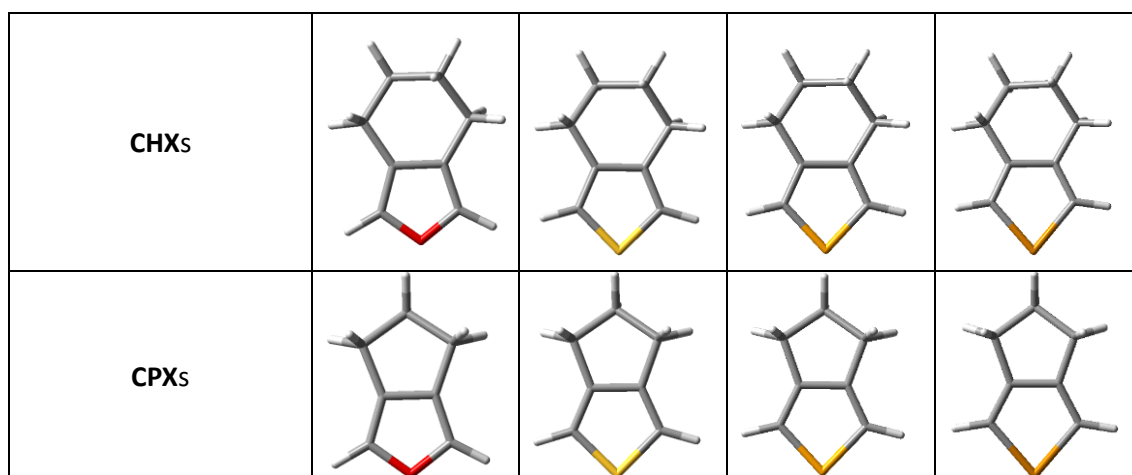

**Table S4.** Optimized geometry of the oligomer and polymers of **CHS** and **CPS**

|             | Front View                                                                          | Side View                                                                           |             | Front View                                                                           | Side View                                                                             |
|-------------|-------------------------------------------------------------------------------------|-------------------------------------------------------------------------------------|-------------|--------------------------------------------------------------------------------------|---------------------------------------------------------------------------------------|
| <b>CHS</b>  | 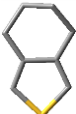   |    | <b>CPS</b>  |   |    |
| <b>2CHS</b> |    |    | <b>2CPS</b> |   |    |
| <b>3CHS</b> |    |    | <b>3CPS</b> |    |    |
| <b>4CHS</b> |    |    | <b>4CPS</b> |    |    |
| <b>5CHS</b> |   |   | <b>5CPS</b> |   |  |
| <b>6CHS</b> |  |  | <b>6CPS</b> |  |  |
| <b>PCHS</b> |  |  | <b>PCPS</b> |  |  |

**Table S5.** Optimized geometry of the oligomer and polymers of **CHSe** and **CPSe**

|              | Front View                                                                          | Side View                                                                           |              | Front View                                                                           | Side View                                                                             |
|--------------|-------------------------------------------------------------------------------------|-------------------------------------------------------------------------------------|--------------|--------------------------------------------------------------------------------------|---------------------------------------------------------------------------------------|
| <b>CHSe</b>  | 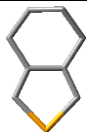   |    | <b>CPSe</b>  |   |    |
| <b>2CHSe</b> |    |    | <b>2CPSe</b> |   |    |
| <b>3CHSe</b> |    |    | <b>3CPSe</b> |    |    |
| <b>4CHSe</b> |    |    | <b>4CPSe</b> |    |    |
| <b>5CHSe</b> |  |   | <b>5CPSe</b> |  |  |
| <b>6CHSe</b> |  |  | <b>6CPSe</b> |  |  |
| <b>PCHSe</b> |  |  | <b>PCPSe</b> |  |  |



**Table S6.** Optimized geometry of the oligomer and polymers of **CHTe** and **CPTe**

|              | Front View                                                                          | Side View                                                                           |              | Front View                                                                           | Side View                                                                             |
|--------------|-------------------------------------------------------------------------------------|-------------------------------------------------------------------------------------|--------------|--------------------------------------------------------------------------------------|---------------------------------------------------------------------------------------|
| <b>CHTe</b>  | 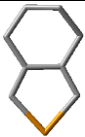   |    | <b>CPTe</b>  |   |    |
| <b>2CHTe</b> |    |    | <b>2CPTe</b> |   |    |
| <b>3CHTe</b> |    |    | <b>3CPTe</b> |    |    |
| <b>4CHTe</b> |    |    | <b>4CPTe</b> |    |    |
| <b>5CHTe</b> |   |   | <b>5CPTe</b> |   |  |
| <b>6CHTe</b> |  |  | <b>6CPTe</b> |  |  |
| <b>PCHTe</b> |  |  | <b>PCPTe</b> |  |  |

Computationally (TDDFT-B3LYP-SDD) obtained gas-phase UV-vis spectra

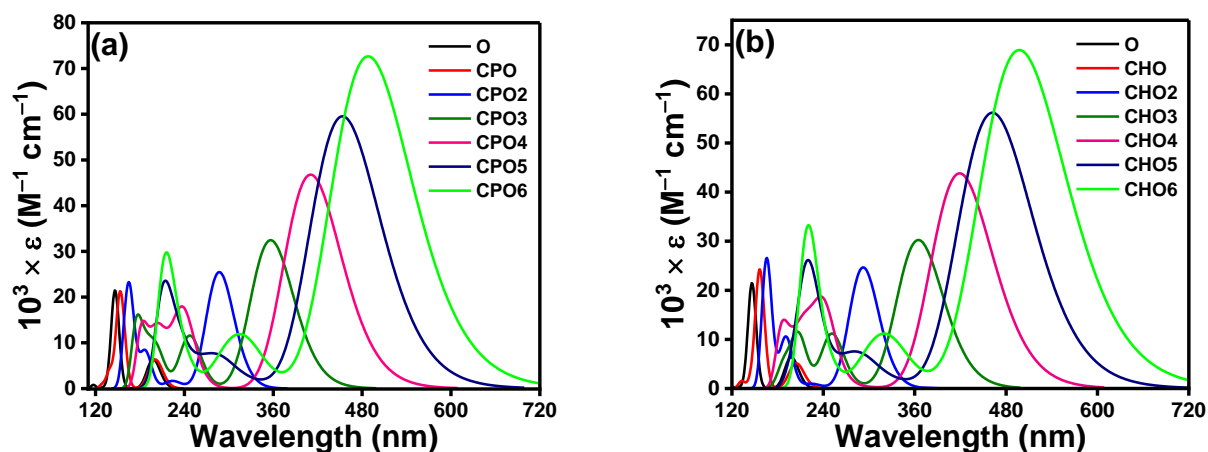

Figure S3. Gas phase UV-vis spectra of the (a) CPO and (b) CHO

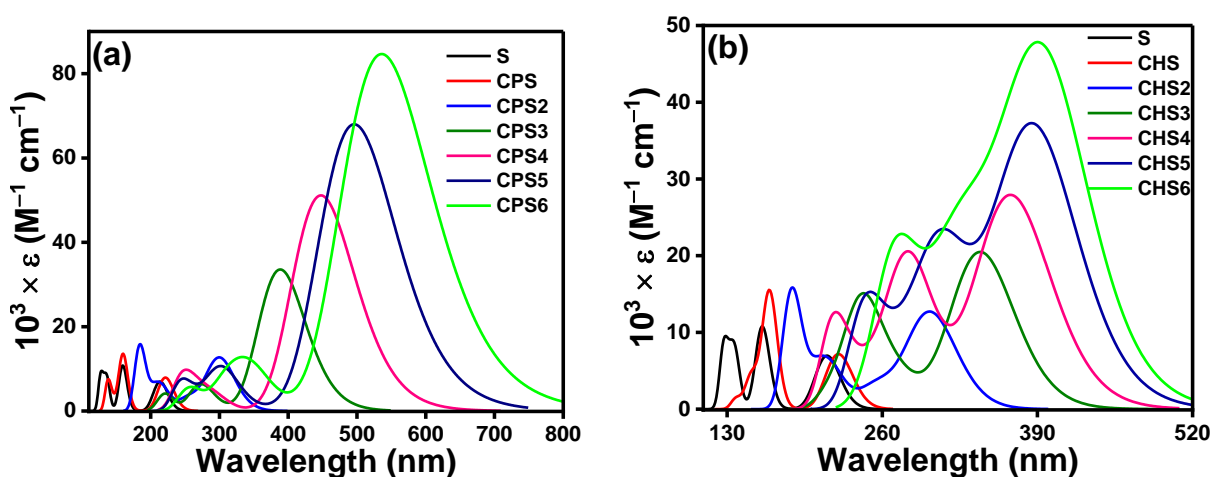

Figure S4. Gas phase UV-vis spectra of the (a) CPS and (b) CHS

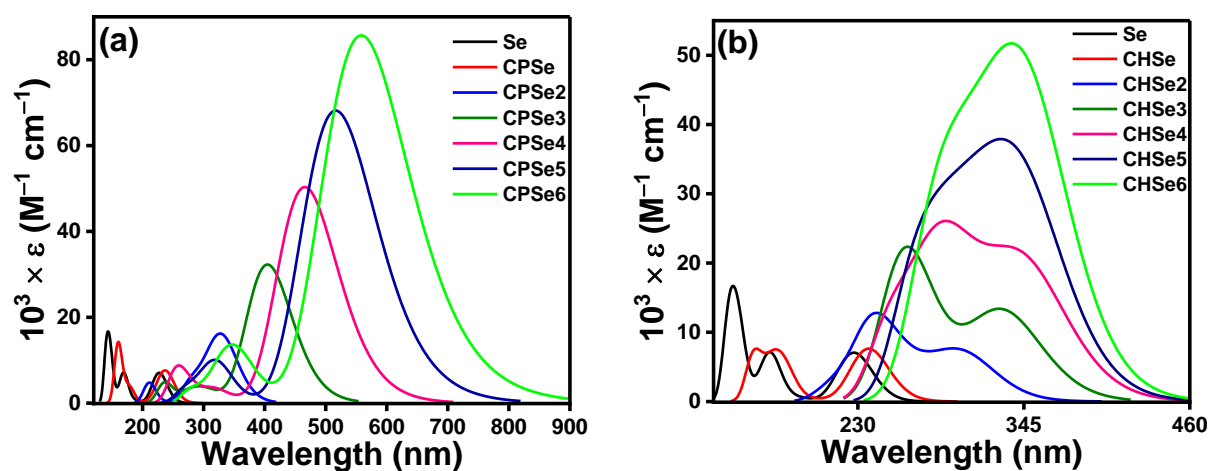

Figure S5. Gas phase UV-vis spectra of the (a) CPSe and (b) CHSe

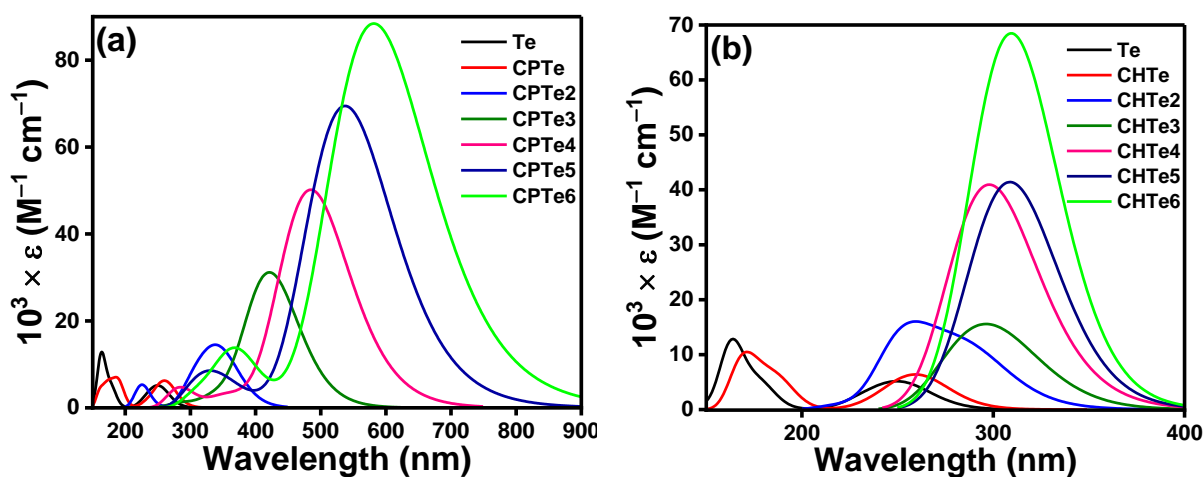

**Figure S6.** Gas phase UV–vis spectra of the (a) CPTe and (b) CHTe

### Orbital Contributions

**Table S7.** Orbital Contribution of (5,5-bis(methoxymethyl)-5,6-dihydro-4H-cyclopenta[c]thiophene-1,3-diyl)bis(trimethylsilane)

| Compound                                                                                    | State number | Oscillator Strength ( <i>f</i> ) | Transition energy (eV) | Wavelength (nm) | Major transitions |                  |
|---------------------------------------------------------------------------------------------|--------------|----------------------------------|------------------------|-----------------|-------------------|------------------|
|                                                                                             |              |                                  |                        |                 | Orbitals involved | Contribution (%) |
| (5,5-bis(methoxymethyl)-5,6-dihydro-4H-cyclopenta[c]thiophene-1,3-diyl)bis(trimethylsilane) | 1            | 0.3164                           | 5.0809                 | 244.02          | H→L               | 95.81            |

**Table S8.** Orbital contribution of electronic transitions in chalcogenophene

| Compounds   | State | Oscillator Strength ( <i>f</i> ) | Transition energy (eV) | Wavelength (nm) | Major transitions |                  |                   |                  |
|-------------|-------|----------------------------------|------------------------|-----------------|-------------------|------------------|-------------------|------------------|
|             |       |                                  |                        |                 | Orbitals involved | Contribution (%) | Orbitals involved | Contribution (%) |
| Furan       | 1     | 0.1567                           | 6.2605                 | 198.04          | H→L               | 98.47            | -                 | -                |
|             | 5     | 0.4501                           | 8.4232                 | 147.19          | H→L+1             | 57.82            | H-1→L             | 38.42            |
| Thiophene   | 1     | 0.1005                           | 5.7780                 | 214.58          | H→L               | 95.62            | H-2→L+1           | 2.11             |
|             | 7     | 0.1885                           | 7.7512                 | 159.95          | H→L+2             | 71.64            | H-3→L             | 15.98            |
|             | 16    | 0.2066                           | 9.7285                 | 127.44          | H-2→L+1           | 85.56            | H-5→L+1           | 5.0              |
| Selenophene | 1     | 0.1022                           | 5.3899                 | 233.68          | H-1→L             | 90.50            | H→L+4             | 6.19             |
|             | 10    | 0.0755                           | 7.2740                 | 170.45          | H-1→L+3           | 84.45            | H→L+4             | 12.43            |
|             | 20    | 0.2833                           | 8.7996                 | 140.90          | H-3→L             | 59.05            | H→L+4             | 20.00            |

|              |    |        |        |        |       |       |         |       |
|--------------|----|--------|--------|--------|-------|-------|---------|-------|
| Tellurophene | 3  | 0.1063 | 4.8888 | 253.61 | H→L+1 | 92.40 | H-1→L+1 | 3.12  |
|              | 10 | 0.2670 | 7.5686 | 177.77 | H→L+5 | 43.02 | H-2→L   | 41.48 |

**Table S9.** Orbital contribution of electronic transitions in **CPX**

| Compounds | State | Oscillator Strength ( <i>f</i> ) | Transition energy (eV) | Wavelength (nm) | Major transitions |                  |                   |                  |
|-----------|-------|----------------------------------|------------------------|-----------------|-------------------|------------------|-------------------|------------------|
|           |       |                                  |                        |                 | Orbitals involved | Contribution (%) | Orbitals involved | Contribution (%) |
| CPO       | 1     | 0.1302                           | 6.1379                 | 202.00          | H→L               | 98.54            | -                 | -                |
|           | 5     | 0.3289                           | 8.0285                 | 154.43          | H→L+1             | 50.07            | H→L+3             | 17.05            |
|           | 13    | 0.0175                           | 8.8876                 | 139.50          | H-1→L+3           | 90.35            | H→L+5             | 4.5              |
| CPS       | 1     | 0.1196                           | 5.5420                 | 223.72          | H-1→L             | 90.04            | H→L+2             | 8.01             |
|           | 2     | 0.0817                           | 5.6829                 | 218.17          | H→L               | 95.74            | -                 | -                |
|           | 9     | 0.1610                           | 7.6698                 | 161.65          | H→L+2             | 56.62            | H-3→L             | 29.83            |
|           | 10    | 0.1421                           | 7.9206                 | 156.53          | H-3→L             | 64.01            | H→L+2             | 22.91            |
|           | 18    | 0.1320                           | 9.0219                 | 137.43          | H-6→L             | 76.66            | H-8→L             | 10.19            |
| CPSe      | 3     | 0.1459                           | 5.1632                 | 240.13          | H→L               | 92.17            | H-1→L+5           | 4.80             |
|           | 8     | 0.0492                           | 6.8785                 | 180.25          | H→L+3             | 97.05            | -                 | -                |
|           | 18    | 0.2033                           | 7.8119                 | 158.71          | H-1→L+5           | 43.01            | H-3→L             | 34.76            |
| CPTe      | 3     | 0.1459                           | 4.7390                 | 261.62          | H→L+1             | 93.30            | H-1→L+5           | 2.78             |
|           | 10    | 0.0589                           | 6.5352                 | 189.72          | H→L+3             | 97.26            | -                 | -                |
|           | 15    | 0.0997                           | 7.1394                 | 173.66          | H→L+5             | 82.90            | H-2→L             | 5.70             |
|           | 20    | 0.0798                           | 7.7258                 | 160.48          | H-1→L+5           | 42.06            | H-6→L+1           | 18.99            |

**Table S10.** Orbital contribution of electronic transitions in **2CPX**

| Compound Name | State | Oscillator Strength ( <i>f</i> ) | Transition energy (eV) | Wavelength (nm) | Major transitions |                  |
|---------------|-------|----------------------------------|------------------------|-----------------|-------------------|------------------|
|               |       |                                  |                        |                 | Orbitals involved | Contribution (%) |
| 2CPO          | 1     | 0.6287                           | 4.3176s                | 287.16          | H→L               | 100              |
| 2CPS          | 1     | 0.4634                           | 3.9413                 | 314.58          | H→L               | 98.50            |
|               | 3     | 0.1110                           | 4.7044                 | 263.55          | H-1→L             | 94.00            |
| 2CPSe         | 1     | 0.3852                           | 3.7657                 | 329.25          | H→L               | 95.94            |
|               | 4     | 0.1341                           | 4.3798                 | 283.08          | H-1→L             | 93.50            |
| 2CPTe         | 2     | 0.2949                           | 3.5688                 | 347.41          | H→L               | 88.75            |
|               | 7     | 0.1658                           | 4.0098                 | 309.20          | H-1→L             | 88.20            |

**Table S11.** Orbital contribution of electronic transitions in **3CPX**

| Compound Name | State | Oscillator Strength ( <i>f</i> ) | Transition energy (eV) | Wavelength (nm) | Major transitions |                  |
|---------------|-------|----------------------------------|------------------------|-----------------|-------------------|------------------|
|               |       |                                  |                        |                 | Orbitals involved | Contribution (%) |
| 3CPO          | 1     | 0.8012                           | 3.4777                 | 356.51          | H→L               | 100              |
| 3CPS          | 1     | 0.8286                           | 3.1920                 | 388.42          | H→L               | 100              |

|              |   |        |        |        |     |       |
|--------------|---|--------|--------|--------|-----|-------|
| <b>3CPSe</b> | 1 | 0.7969 | 3.0641 | 404.63 | H→L | 99.38 |
| <b>3CPTe</b> | 1 | 0.7628 | 2.9380 | 422.00 | H→L | 98.14 |

**Table S12.** Orbital contribution of electronic transitions in **4CPX**

| Compound Name | State | Oscillator Strength (f) | Transition energy (eV) | Wavelength (nm) | Major transitions |                  |
|---------------|-------|-------------------------|------------------------|-----------------|-------------------|------------------|
|               |       |                         |                        |                 | Orbitals involved | Contribution (%) |
| <b>4CPO</b>   | 1     | 1.1551                  | 3.0207                 | 410.45          | H→L               | 100              |
| <b>4CPS</b>   | 1     | 1.2625                  | 2.7702                 | 447.56          | H→L               | 100              |
| <b>4CPSe</b>  | 1     | 1.2429                  | 2.6618                 | 465.80          | H→L               | 99.96            |
| <b>4CPTe</b>  | 1     | 1.2382                  | 2.5571                 | 484.86          | H→L               | 99.42            |

**Table S13.** Orbital contribution of electronic transitions in **5CPX**

| Compound Name | State | Oscillator Strength (f) | Transition energy (eV) | Wavelength (nm) | Major transitions |                  |
|---------------|-------|-------------------------|------------------------|-----------------|-------------------|------------------|
|               |       |                         |                        |                 | Orbitals involved | Contribution (%) |
| <b>5CPO</b>   | 1     | 1.4700                  | 2.7339                 | 453.51          | H→L               | 100              |
| <b>5CPS</b>   | 1     | 1.6787                  | 2.4997                 | 495.99          | H→L               | 100              |
| <b>5CPSe</b>  | 1     | 1.6827                  | 2.4014                 | 516.30          | H→L               | 100              |
| <b>5CPTe</b>  | 1     | 1.7148                  | 2.3071                 | 537.40          | H→L               | 99.71            |

**Table S14.** Orbital contribution of electronic transitions in **6CPX**

| Compound Name | State | Oscillator Strength (f) | Transition energy (eV) | Wavelength (nm) | Major transitions |                  |
|---------------|-------|-------------------------|------------------------|-----------------|-------------------|------------------|
|               |       |                         |                        |                 | Orbitals involved | Contribution (%) |
| <b>6CPO</b>   | 1     | 1.7940                  | 2.5399                 | 488.14          | H→L               | 99.96            |
| <b>6CPS</b>   | 1     | 2.0902                  | 2.3135                 | 535.92          | H→L               | 99.96            |
| <b>6CPSe</b>  | 1     | 2.1151                  | 2.2211                 | 558.21          | H→L               | 99.84            |
| <b>6CPTe</b>  | 1     | 2.1831                  | 2.1323                 | 581.47          | H→L               | 99.65            |

**Table S15.** Orbital contribution of electronic transitions in **CHX**

| Compound Name | State | Oscillator Strength (f) | Transition energy (eV) | Wavelength (nm) | Major transitions |                  |                   |                  |
|---------------|-------|-------------------------|------------------------|-----------------|-------------------|------------------|-------------------|------------------|
|               |       |                         |                        |                 | Orbitals involved | Contribution (%) | Orbitals involved | Contribution (%) |
| <b>CHO</b>    | 1     | 0.1156                  | 6.0365                 | 205.39          | H→L               | 98.63            | -                 | -                |
|               | 5     | 0.5026                  | 7.8876                 | 157.19          | H→L+1             | 64.64            | H-1→L             | 24.35            |
| <b>CHS</b>    | 1     | 0.1062                  | 5.5450                 | 223.60          | H-1→L             | 88.43            | H→L+2             | 9.61             |
|               | 9     | 0.2848                  | 7.4908                 | 165.51          | H→L+2             | 76.66            | H-6→L             | 8.48             |
|               | 13    | 0.1046                  | 8.2328                 | 150.60          | H-6→L             | 86.39            | H→L+2             | 7.35             |
|               | 18    | 0.0235                  | 9.0070                 | 137.65          | H-2→L+1           | 96.54            | -                 | -                |

|             |    |        |        |        |         |       |         |       |
|-------------|----|--------|--------|--------|---------|-------|---------|-------|
| <b>CHSe</b> | 3  | 0.1257 | 5.1888 | 238.94 | H-1→L   | 75.40 | H-1→L+1 | 16.48 |
|             | 14 | 0.0733 | 7.2372 | 171.32 | H→L+5   | 60.07 | H-5→L   | 24.98 |
|             | 18 | 0.0692 | 7.8237 | 158.47 | H-2→L+1 | 82.66 | H-6→L   | 11.49 |
| <b>CHTe</b> | 3  | 0.1419 | 4.7416 | 261.48 | H→L+1   | 90.48 | H-1→L+5 | 3.01  |
|             | 19 | 0.1041 | 7.4198 | 167.10 | H-5→L   | 56.91 | H→L+5   | 14.46 |

**Table S16.** Orbital contribution of electronic transitions in **2CHX**

| Compound Name | State | Oscillator Strength ( <i>f</i> ) | Transition energy (eV) | Wavelength (nm) | Major transitions |                  |                   |                  |
|---------------|-------|----------------------------------|------------------------|-----------------|-------------------|------------------|-------------------|------------------|
|               |       |                                  |                        |                 | Orbitals involved | Contribution (%) | Orbitals involved | Contribution (%) |
| <b>2CHO</b>   | 1     | 0.6088                           | 4.2402                 | 292.40          | H→L               | 100              | -                 | -                |
| <b>2CHS</b>   | 1     | 0.3098                           | 4.1287                 | 300.30          | H→L               | 96.94            | -                 | -                |
|               | 4     | 0.0676                           | 4.8350                 | 256.43          | H-2→L             | 93.19            | -                 | -                |
| <b>2CHSe</b>  | 1     | 0.1552                           | 4.0725                 | 304.44          | H→L               | 90.60            | -                 | -                |
|               | 4     | 0.0510                           | 4.4875                 | 276.29          | H-1→L             | 83.00            | H-2→L+1           | 13.00            |
| <b>2CHTe</b>  | 8     | 0.1456                           | 4.3235                 | 286.77          | H-3→L+1           | 33.59            | H-1→L             | 27.26            |
|               | 14    | 0.1345                           | 4.8469                 | 255.80          | H-1→L+3           | 50.07            | H-2→L+3           | 20.43            |
|               | 16    | 0.0044                           | 4.9393                 | 251.01          | H-3→L+3           | 66.46            | H-2→L+2           | 13.89            |

**Table S17.** Orbital contribution of electronic transitions in **3CHX**

| Compound Name | State | Oscillator Strength ( <i>f</i> ) | Transition energy (eV) | Wavelength (nm) | Major transitions |                  |                   |                  |
|---------------|-------|----------------------------------|------------------------|-----------------|-------------------|------------------|-------------------|------------------|
|               |       |                                  |                        |                 | Orbitals involved | Contribution (%) | Orbitals involved | Contribution (%) |
| <b>3CHO</b>   | 1     | 0.7466                           | 3.3976                 | 364.92          | H→L               | 100              | -                 | -                |
| <b>3CHS</b>   | 1     | 0.5044                           | 3.6227                 | 342.24          | H→L               | 99.37            | -                 | -                |
| <b>3CHSe</b>  | 1     | 0.3126                           | 3.7427                 | 331.27          | H→L               | 94.93            | -                 | -                |
| <b>3CHTe</b>  | 8     | 0.0867                           | 3.9617                 | 312.96          | H-1→L             | 36.77            | H-3→L             | 27.80            |
|               | 12    | 0.0076                           | 4.1488                 | 298.85          | H-3→L+1           | 38.93            | H→L+2             | 11.06            |
|               | 19    | 0.0019                           | 4.3570                 | 284.56          | H-5→L+3           | 27.08            | H-3→L+3           | 16.32            |

**Table S18.** Orbital contribution of electronic transitions in **4CHX**

| Compound Name | State | Oscillator Strength ( <i>f</i> ) | Transition energy (eV) | Wavelength (nm) | Major transitions |                  |                   |                  |
|---------------|-------|----------------------------------|------------------------|-----------------|-------------------|------------------|-------------------|------------------|
|               |       |                                  |                        |                 | Orbitals involved | Contribution (%) | Orbitals involved | Contribution (%) |
| <b>4CHO</b>   | 1     | 1.0819                           | 2.9587                 | 419.05          | H→L               | 100              | -                 | -                |
| <b>4CHS</b>   | 1     | 0.6838                           | 3.3692                 | 367.99          | H→L               | 98.96            | -                 | -                |
| <b>4CHSe</b>  | 1     | 0.4491                           | 3.5709                 | 347.21          | H→L               | 96.83            | -                 | -                |
| <b>4CHTe</b>  | 14    | 0.1581                           | 4.0034                 | 309.70          | H-1→L+1           | 27.59            | H→L               | 15.74            |
|               | 20    | 0.1599                           | 4.1361                 | 299.76          | H-1→L+3           | 29.19            | H-2→L+2           | 13.94            |
|               | 27    | 0.3616                           | 4.2999                 | 288.34          | H-5→L+3           | 19.90            | H-4→L+2           | 16.74            |

**Table S19.** Orbital contribution of electronic transitions in **5CHX**

| Compound Name | State | Oscillator Strength ( <i>f</i> ) | Transition energy (eV) | Wavelength (nm) | Major transitions |                  |                   |                  |
|---------------|-------|----------------------------------|------------------------|-----------------|-------------------|------------------|-------------------|------------------|
|               |       |                                  |                        |                 | Orbitals involved | Contribution (%) | Orbitals involved | Contribution (%) |
| <b>5CHO</b>   | 1     | 1.3866                           | 2.6831                 | 462.09          | H→L               | 100              | -                 | -                |
| <b>5CHS</b>   | 1     | 0.9036                           | 3.2053                 | 386.81          | H→L               | 98.82            | -                 | -                |
| <b>5CHSe</b>  | 1     | 0.5955                           | 3.5595                 | 348.32          | H→L               | 96.56            | -                 | -                |
|               | 4     | 0.2404                           | 3.8320                 | 323.55          | H-1→L+1           | 64.62            | H-2→L             | 10.65            |
|               | 8     | 0.2634                           | 4.1393                 | 299.53          | H→L+2             | 40.21            | H-2→L             | 26.29            |
| <b>5CHTe</b>  | 15    | 0.2337                           | 3.9098                 | 317.11          | H-1→L+1           | 35.47            | -                 | -                |
|               | 19    | 0.1655                           | 4.0067                 | 309.44          | H-1→L+3           | 29.19            | -                 | -                |
|               | 29    | 0.1940                           | 4.1437                 | 299.21          | H-5→L+3           | 24.04            | H-6→L+1           | 15.69            |

**Table S20.** Orbital contribution of electronic transitions in **6CHX**

| Compound Name | State | Oscillator Strength ( <i>f</i> ) | Transition energy (eV) | Wavelength (nm) | Major transitions |                  |                   |                  |
|---------------|-------|----------------------------------|------------------------|-----------------|-------------------|------------------|-------------------|------------------|
|               |       |                                  |                        |                 | Orbitals involved | Contribution (%) | Orbitals involved | Contribution (%) |
| <b>6CHO</b>   | 1     | 1.7021                           | 2.4927                 | 497.38          | H→L               | 99.92            | -                 | -                |
| <b>6CHS</b>   | 1     | 1.1183                           | 3.1409                 | 394.74          | H→L               | 97.53            | -                 | -                |
| <b>6CHSe</b>  | 1     | 0.8661                           | 3.5351                 | 350.72          | H→L               | 91.60            | -                 | -                |
|               | 8     | 0.3791                           | 3.9880                 | 310.89          | H-2→L+2           | 26.94            | H→L+2             | 20.72            |
|               | 24    | 0.3018                           | 4.3761                 | 283.32          | H-2→L+2           | 32.46            | H-1→L+3           | 17.21            |
| <b>6CHTe</b>  | 22    | 0.3470                           | 3.9534                 | 313.61          | H-6→L+1           | 18.87            | H-1→L+2           | 16.69            |
|               | 25    | 0.3261                           | 4.0175                 | 308.61          | H-5→L+2           | 10.86            | H-2→L             | 10.77            |
|               | 31    | 0.3059                           | 4.0763                 | 304.16          | H-9→L+3           | 21.85            | H→L+3             | 20.22            |

**Optimized Energy (Hartree)****Table S21.** Energy of the optimized (5,5-bis(methoxymethyl)-5,6-dihydro-4H-cyclopenta[c]thiophene-1,3-diyl)bis(trimethylsilane)

| Compound                                                                                    | Energy (Hartree) |
|---------------------------------------------------------------------------------------------|------------------|
| (5,5-bis(methoxymethyl)-5,6-dihydro-4H-cyclopenta[c]thiophene-1,3-diyl)bis(trimethylsilane) | -1794.5837070    |

**Table S22.** Energy of the optimized chalcogenophene

| Compounds    | Energy (Hartree) |
|--------------|------------------|
| Furan        | -229.9860492     |
| Thiophene    | -552.9455852     |
| Selenophene  | -164.1228203     |
| Tellurophene | -162.8486085     |

**Table S23.** Energy of the optimized CPX

| Compounds        | Energy (Hartree) |
|------------------|------------------|
| CPO              | -346.6962664     |
| CPS              | -669.6609078     |
| CPS <sub>e</sub> | -280.8391428     |
| CPT <sub>e</sub> | -279.5664412     |

**Table S24.** Energy of the optimized 2CPX

| Compounds         | Energy (Hartree) |
|-------------------|------------------|
| 2CPO              | -692.2093466     |
| 2CPS              | -1338.1331951    |
| 2CPS <sub>e</sub> | -560.4894701     |
| 2CPT <sub>e</sub> | -557.9404176     |

**Table S25.** Energy of the optimized 3CPX

| Compounds         | Energy (Hartree) |
|-------------------|------------------|
| 3CPO              | -1037.7229926    |
| 3CPS              | -2006.6063009    |
| 3CPS <sub>e</sub> | -840.1407251     |
| 3CPT <sub>e</sub> | -836.315022      |



**Table S26.** Energy of the optimized **4CPX**

| Compounds    | Energy (Hartree) |
|--------------|------------------|
| <b>4CPO</b>  | -1383.2368772    |
| <b>4CPS</b>  | -2675.0796139    |
| <b>4CPSe</b> | -1119.7921924    |
| <b>4CPTe</b> | -1114.6897604    |

**Table S27.** Energy of the optimized **5CPX**

| Compounds    | Energy (Hartree) |
|--------------|------------------|
| <b>5CPO</b>  | -1728.7507897    |
| <b>5CPS</b>  | -3343.552938     |
| <b>5CPSe</b> | -1399.4436633    |
| <b>5CPTe</b> | -1393.0645297    |

**Table S28.** Energy of the optimized **6CPX**

| Compounds    | Energy (Hartree) |
|--------------|------------------|
| <b>6CPO</b>  | -2074.2647228    |
| <b>6CPS</b>  | -4012.0263003    |
| <b>6CPSe</b> | -1679.0951668    |
| <b>6CPTe</b> | -1671.4393181    |

**Table S29.** Energy of the optimized **PCPXs**

| Compounds    | Energy (Hartree) |
|--------------|------------------|
| <b>PCPO</b>  | -691.0278481     |
| <b>PCPS</b>  | -1337.1169193    |
| <b>PCPSe</b> | -559.3029959     |
| <b>PCPTe</b> | -556.7496582     |

**Table S30.** Energy of the optimized **CHXs**

| Compounds   | Energy (Hartree) |
|-------------|------------------|
| <b>CHO</b>  | -386.0166933     |
| <b>CHS</b>  | -708.976755      |
| <b>CHSe</b> | -320.1535886     |
| <b>CHTe</b> | -318.8788132     |

**Table S31.** Energy of the optimized **2CHXs**

| Compounds    | Energy (Hartree) |
|--------------|------------------|
| <b>2CHO</b>  | -770.8499267     |
| <b>2CHS</b>  | -1416.7607782    |
| <b>2CHSe</b> | -639.1141401     |
| <b>2CHTe</b> | -636.5627672     |

**Table S32.** Energy of the optimized **3CHXs**

| Compounds    | Energy (Hartree) |
|--------------|------------------|
| <b>3CHO</b>  | -1155.6835761    |
| <b>3CHS</b>  | -2124.545092     |
| <b>3CHSe</b> | -958.0749552     |
| <b>3CHTe</b> | -954.2467532     |

**Table S33.** Energy of the optimized **4CHXs**

| Compounds    | Energy (Hartree) |
|--------------|------------------|
| <b>4CHO</b>  | -1540.5175324    |
| <b>4CHS</b>  | -2832.3293363    |
| <b>4CHSe</b> | -1277.0357326    |
| <b>4CHTe</b> | -1271.9307992    |

**Table S34.** Energy of the optimized **5CHXs**

| Compounds    | Energy (Hartree) |
|--------------|------------------|
| <b>5CHO</b>  | -1925.3515061    |
| <b>5CHS</b>  | -3540.1136015    |
| <b>5CHSe</b> | -1595.9965555    |
| <b>5CHTe</b> | -1589.6148387    |

**Table S35.** Energy of the optimized **6CHXs**

| Compounds    | Energy (Hartree) |
|--------------|------------------|
| <b>6CHO</b>  | -2310.1854927    |
| <b>6CHS</b>  | -4247.8978621    |
| <b>6CHSe</b> | -1914.9573536    |
| <b>6CHTe</b> | -1907.2988719    |

**Table S36.** Energy of the optimized **PCHXs**

| Compounds    | Energy (Hartree) |
|--------------|------------------|
| <b>PCHO</b>  | -769.6677978     |
| <b>PCHS</b>  | -1415.7558195    |
| <b>PCHSe</b> | -637.9143631     |
| <b>PCHTe</b> | -635.3637404     |

**Table S37.** Harmonic frequency of the optimized **6CHTe**

| Mode | Harmonic frequency (cm <sup>-1</sup> ) |
|------|----------------------------------------|
| 1    | 4.648                                  |
| 2    | 5.2846                                 |
| 3    | 8.973                                  |
| 4    | 12.6446                                |
| 5    | 12.9869                                |
| 6    | 18.1884                                |
| 7    | 23.7461                                |

|    |          |
|----|----------|
| 8  | 26.3202  |
| 9  | 34.3268  |
| 10 | 46.0878  |
| 11 | 50.9739  |
| 12 | 60.0452  |
| 13 | 75.4951  |
| 14 | 93.5984  |
| 15 | 93.7519  |
| 16 | 106.6511 |
| 17 | 108.9316 |
| 18 | 112.9711 |
| 19 | 124.4556 |
| 20 | 129.4895 |
| 21 | 135.0162 |
| 22 | 135.8753 |
| 23 | 139.562  |
| 24 | 140.954  |
| 25 | 143.6055 |
| 26 | 145.4383 |
| 27 | 148.2999 |
| 28 | 149.7118 |
| 29 | 150.2891 |
| 30 | 156.7138 |
| 31 | 156.8239 |
| 32 | 162.6508 |
| 33 | 177.7205 |
| 34 | 190.1736 |
| 35 | 203.9882 |
| 36 | 215.7206 |
| 37 | 219.8629 |
| 38 | 219.9361 |
| 39 | 224.9402 |
| 40 | 228.018  |
| 41 | 232.7737 |
| 42 | 235.4584 |
| 43 | 240.7707 |
| 44 | 264.2509 |
| 45 | 290.6696 |
| 46 | 299.6846 |
| 47 | 301.0133 |
| 48 | 303.2524 |

|    |          |
|----|----------|
| 49 | 306.7021 |
| 50 | 315.2338 |
| 51 | 323.7485 |
| 52 | 329.6963 |
| 53 | 339.0434 |
| 54 | 358.4723 |
| 55 | 368.6929 |
| 56 | 383.0582 |
| 57 | 410.9383 |
| 58 | 413.409  |
| 59 | 444.7227 |
| 60 | 451.2648 |
| 61 | 468.3712 |
| 62 | 495.7589 |
| 63 | 528.958  |
| 64 | 557.4061 |
| 65 | 580.2214 |
| 66 | 597.2052 |
| 67 | 613.4995 |
| 68 | 618.3461 |
| 69 | 618.4412 |
| 70 | 621.1028 |
| 71 | 631.3299 |
| 72 | 633.0717 |
| 73 | 636.2156 |
| 74 | 645.1141 |
| 75 | 645.3117 |
| 76 | 653.8399 |
| 77 | 653.8985 |
| 78 | 659.8238 |
| 79 | 671.8498 |
| 80 | 677.1244 |
| 81 | 687.9782 |
| 82 | 697.0135 |
| 83 | 697.4035 |
| 84 | 699.4081 |
| 85 | 700.5068 |
| 86 | 701.7914 |
| 87 | 703.6263 |
| 88 | 709.4865 |
| 89 | 710.9996 |

|     |          |
|-----|----------|
| 90  | 727.2971 |
| 91  | 752.284  |
| 92  | 760.4828 |
| 93  | 762.722  |
| 94  | 776.3449 |
| 95  | 828.4356 |
| 96  | 846.3795 |
| 97  | 855.391  |
| 98  | 859.3232 |
| 99  | 860.7127 |
| 100 | 875.5495 |
| 101 | 875.6406 |
| 102 | 883.2181 |
| 103 | 891.3549 |
| 104 | 899.6663 |
| 105 | 905.8278 |
| 106 | 908.0567 |
| 107 | 908.3241 |
| 108 | 917.182  |
| 109 | 919.1747 |
| 110 | 921.1895 |
| 111 | 922.4265 |
| 112 | 935.4852 |
| 113 | 935.4977 |
| 114 | 947.9634 |
| 115 | 949.7016 |
| 116 | 952.9613 |
| 117 | 956.5558 |
| 118 | 978.0244 |
| 119 | 995.4482 |
| 120 | 1021.587 |
| 121 | 1036.775 |
| 122 | 1040.288 |
| 123 | 1054.206 |
| 124 | 1061.812 |
| 125 | 1062.01  |
| 126 | 1065.865 |
| 127 | 1066.516 |
| 128 | 1075.32  |
| 129 | 1075.741 |
| 130 | 1076.129 |

|     |          |
|-----|----------|
| 131 | 1076.425 |
| 132 | 1077.954 |
| 133 | 1078.189 |
| 134 | 1084.368 |
| 135 | 1097.383 |
| 136 | 1146.221 |
| 137 | 1146.605 |
| 138 | 1165.515 |
| 139 | 1165.561 |
| 140 | 1168.959 |
| 141 | 1169.405 |
| 142 | 1169.843 |
| 143 | 1170.058 |
| 144 | 1207.385 |
| 145 | 1213.976 |
| 146 | 1219.471 |
| 147 | 1221.956 |
| 148 | 1222.326 |
| 149 | 1222.986 |
| 150 | 1226.09  |
| 151 | 1234.572 |
| 152 | 1247.228 |
| 153 | 1254.4   |
| 154 | 1255.629 |
| 155 | 1260.807 |
| 156 | 1263.833 |
| 157 | 1263.882 |
| 158 | 1264.579 |
| 159 | 1266.464 |
| 160 | 1275.586 |
| 161 | 1304.687 |
| 162 | 1310.638 |
| 163 | 1313.352 |
| 164 | 1315.361 |
| 165 | 1317.151 |
| 166 | 1318.458 |
| 167 | 1321.969 |
| 168 | 1322.348 |
| 169 | 1322.883 |
| 170 | 1323.777 |
| 171 | 1325.393 |

|     |          |
|-----|----------|
| 172 | 1328.376 |
| 173 | 1336.965 |
| 174 | 1346.404 |
| 175 | 1357.513 |
| 176 | 1364.218 |
| 177 | 1364.239 |
| 178 | 1365.251 |
| 179 | 1367.75  |
| 180 | 1374.332 |
| 181 | 1374.379 |
| 182 | 1375.594 |
| 183 | 1378.164 |
| 184 | 1379.297 |
| 185 | 1459.062 |
| 186 | 1482.066 |
| 187 | 1494.896 |
| 188 | 1498.218 |
| 189 | 1505.698 |
| 190 | 1505.712 |
| 191 | 1507.847 |
| 192 | 1507.861 |
| 193 | 1508.14  |
| 194 | 1508.588 |
| 195 | 1509.358 |
| 196 | 1509.872 |
| 197 | 1511.543 |
| 198 | 1511.875 |
| 199 | 1513.056 |
| 200 | 1514.008 |
| 201 | 1515.933 |
| 202 | 1515.949 |
| 203 | 1528.356 |
| 204 | 1528.433 |
| 205 | 1528.863 |
| 206 | 1529.307 |
| 207 | 1530.539 |
| 208 | 1531.372 |
| 209 | 1542.646 |
| 210 | 1560.9   |
| 211 | 1576.941 |
| 212 | 1588.131 |



|     |          |
|-----|----------|
| 213 | 1604.874 |
| 214 | 1605.261 |
| 215 | 3021.518 |
| 216 | 3021.56  |
| 217 | 3021.731 |
| 218 | 3021.89  |
| 219 | 3021.921 |
| 220 | 3021.96  |
| 221 | 3022.346 |
| 222 | 3022.442 |
| 223 | 3022.644 |
| 224 | 3022.726 |
| 225 | 3039.629 |
| 226 | 3039.647 |
| 227 | 3061.677 |
| 228 | 3061.735 |
| 229 | 3061.821 |
| 230 | 3061.94  |
| 231 | 3062.323 |
| 232 | 3062.463 |
| 233 | 3080.444 |
| 234 | 3080.568 |
| 235 | 3081.312 |
| 236 | 3081.563 |
| 237 | 3082.357 |
| 238 | 3082.405 |
| 239 | 3086.275 |
| 240 | 3086.442 |
| 241 | 3087.54  |
| 242 | 3087.614 |
| 243 | 3112.001 |
| 244 | 3112.024 |
| 245 | 3131.192 |
| 246 | 3131.235 |
| 247 | 3131.413 |
| 248 | 3131.429 |
| 249 | 3131.608 |
| 250 | 3131.629 |
| 251 | 3251.892 |
| 252 | 3251.893 |

## Optimized coordinates of the molecules

### Optimization of (5,5-bis(methoxymethyl)-5,6-dihydro-4H-cyclopenta[c]thiophene-1,3-diyl)bis(trimethylsilane)

| -----  |        |        |                         |           |           |  |
|--------|--------|--------|-------------------------|-----------|-----------|--|
| Center | Atomic | Atomic | Coordinates (Angstroms) |           |           |  |
| Number | Number | Type   | X                       | Y         | Z         |  |
| -----  |        |        |                         |           |           |  |
| 1      | 6      | 0      | 1.569598                | -1.101887 | -0.234474 |  |
| 2      | 6      | 0      | 0.272736                | -0.661539 | -0.390643 |  |
| 3      | 6      | 0      | 0.080117                | 0.766244  | -0.268890 |  |
| 4      | 6      | 0      | 1.219239                | 1.500123  | -0.014885 |  |
| 5      | 16     | 0      | 2.629837                | 0.347579  | 0.084065  |  |
| 6      | 14     | 0      | 1.441397                | 3.368064  | 0.237325  |  |
| 7      | 14     | 0      | 2.274307                | -2.863656 | -0.276026 |  |
| 8      | 6      | 0      | -2.120867               | -0.263100 | -0.297017 |  |
| 9      | 6      | 0      | -1.050992               | -1.345431 | -0.687022 |  |
| 10     | 1      | 0      | -1.125563               | -1.584936 | -1.759487 |  |
| 11     | 1      | 0      | -1.215120               | -2.273102 | -0.130554 |  |
| 12     | 6      | 0      | -1.384837               | 1.114225  | -0.473226 |  |
| 13     | 1      | 0      | -1.766042               | 1.871693  | 0.221060  |  |
| 14     | 1      | 0      | -1.559664               | 1.502491  | -1.486712 |  |
| 15     | 6      | 0      | 0.612218                | 3.884535  | 1.879683  |  |
| 16     | 1      | 0      | 0.715768                | 4.965737  | 2.046638  |  |
| 17     | 1      | 0      | -0.459438               | 3.645753  | 1.877338  |  |
| 18     | 1      | 0      | 1.071409                | 3.363972  | 2.729965  |  |
| 19     | 6      | 0      | 3.301514                | 3.780164  | 0.296035  |  |
| 20     | 1      | 0      | 3.801927                | 3.501584  | -0.640219 |  |
| 21     | 1      | 0      | 3.451541                | 4.857295  | 0.450704  |  |

|    |   |   |           |           |           |
|----|---|---|-----------|-----------|-----------|
| 22 | 1 | 0 | 3.804403  | 3.250796  | 1.115729  |
| 23 | 6 | 0 | 0.610146  | 4.292866  | -1.211894 |
| 24 | 1 | 0 | -0.458644 | 4.052138  | -1.278364 |
| 25 | 1 | 0 | 0.702266  | 5.380200  | -1.083154 |
| 26 | 1 | 0 | 1.077019  | 4.023767  | -2.168135 |
| 27 | 6 | 0 | 1.646127  | -3.824978 | 1.250757  |
| 28 | 1 | 0 | 0.548956  | -3.851866 | 1.279108  |
| 29 | 1 | 0 | 2.010075  | -4.861803 | 1.238278  |
| 30 | 1 | 0 | 1.994707  | -3.353643 | 2.178815  |
| 31 | 6 | 0 | 1.674932  | -3.733739 | -1.866956 |
| 32 | 1 | 0 | 2.053715  | -4.764180 | -1.912451 |
| 33 | 1 | 0 | 0.579024  | -3.777037 | -1.908759 |
| 34 | 1 | 0 | 2.026892  | -3.203122 | -2.761033 |
| 35 | 6 | 0 | 4.178704  | -2.783174 | -0.253732 |
| 36 | 1 | 0 | 4.565961  | -2.244704 | -1.128216 |
| 37 | 1 | 0 | 4.548482  | -2.273207 | 0.645298  |
| 38 | 1 | 0 | 4.606041  | -3.795061 | -0.264638 |
| 39 | 6 | 0 | -3.370078 | -0.374755 | -1.179975 |
| 40 | 6 | 0 | -2.514008 | -0.420968 | 1.187092  |
| 41 | 8 | 0 | -4.270416 | 0.724655  | -0.839525 |
| 42 | 8 | 0 | -3.057624 | -1.762923 | 1.383748  |
| 43 | 6 | 0 | -5.533544 | 0.677851  | -1.552753 |
| 44 | 6 | 0 | -3.529322 | -2.000630 | 2.735560  |
| 45 | 1 | 0 | -5.382745 | 0.749108  | -2.642683 |
| 46 | 1 | 0 | -6.083831 | -0.251054 | -1.331107 |
| 47 | 1 | 0 | -6.118355 | 1.537083  | -1.212391 |
| 48 | 1 | 0 | -2.712743 | -1.899287 | 3.469188  |
| 49 | 1 | 0 | -4.337470 | -1.301649 | 3.005774  |
| 50 | 1 | 0 | -3.911919 | -3.025032 | 2.759372  |

|    |   |   |           |           |           |
|----|---|---|-----------|-----------|-----------|
| 51 | 1 | 0 | -1.630254 | -0.281640 | 1.831897  |
| 52 | 1 | 0 | -3.275605 | 0.329698  | 1.445677  |
| 53 | 1 | 0 | -3.873428 | -1.338170 | -1.003953 |
| 54 | 1 | 0 | -3.090381 | -0.303498 | -2.245946 |

## Optimization of Chalcogenophene

### Furan

| Center<br>Number | Atomic<br>Number | Atomic<br>Type | Coordinates (Angstroms) |           |           |
|------------------|------------------|----------------|-------------------------|-----------|-----------|
|                  |                  |                | X                       | Y         | Z         |
| 1                | 6                | 0              | 0.000024                | -0.347132 | 1.122908  |
| 2                | 6                | 0              | 0.000024                | 0.969736  | 0.725189  |
| 3                | 6                | 0              | 0.000024                | 0.969736  | -0.725189 |
| 4                | 6                | 0              | 0.000024                | -0.347132 | -1.122908 |
| 5                | 8                | 0              | 0.000146                | -1.180992 | 0.000000  |
| 6                | 1                | 0              | -0.001202               | -0.845620 | -2.078736 |
| 7                | 1                | 0              | -0.001202               | -0.845620 | 2.078736  |
| 8                | 1                | 0              | 0.000328                | 1.833966  | -1.373233 |
| 9                | 1                | 0              | 0.000328                | 1.833966  | 1.373233  |

### Thiophene

| Center<br>Number | Atomic<br>Number | Atomic<br>Type | Coordinates (Angstroms) |   |   |
|------------------|------------------|----------------|-------------------------|---|---|
|                  |                  |                | X                       | Y | Z |

|   |    |   |           |           |           |
|---|----|---|-----------|-----------|-----------|
| 1 | 6  | 0 | -0.000010 | -0.030230 | 1.268445  |
| 2 | 6  | 0 | -0.000010 | -1.294088 | 0.723139  |
| 3 | 6  | 0 | -0.000010 | -1.294088 | -0.723139 |
| 4 | 6  | 0 | -0.000010 | -0.030230 | -1.268445 |
| 5 | 1  | 0 | 0.000068  | 0.262427  | -2.308367 |
| 6 | 1  | 0 | 0.000068  | 0.262427  | 2.308367  |
| 7 | 16 | 0 | -0.000001 | 1.235310  | 0.000000  |
| 8 | 1  | 0 | 0.000054  | -2.198999 | 1.321411  |
| 9 | 1  | 0 | 0.000054  | -2.198999 | -1.321411 |

### Selenophene

| Center<br>Number | Atomic<br>Number | Atomic<br>Type | Coordinates (Angstroms) |           |           |
|------------------|------------------|----------------|-------------------------|-----------|-----------|
|                  |                  |                | X                       | Y         | Z         |
| 1                | 6                | 0              | 0.000170                | 0.459410  | 1.307188  |
| 2                | 6                | 0              | 0.000170                | 1.705472  | 0.724068  |
| 3                | 6                | 0              | 0.000170                | 1.705472  | -0.724068 |
| 4                | 6                | 0              | 0.000170                | 0.459410  | -1.307188 |
| 5                | 1                | 0              | 0.000014                | 0.219176  | -2.362519 |
| 6                | 1                | 0              | 0.000014                | 0.219176  | 2.362519  |
| 7                | 34               | 0              | -0.000115               | -0.931194 | 0.000000  |
| 8                | 1                | 0              | -0.000090               | 2.621834  | -1.307456 |
| 9                | 1                | 0              | -0.000090               | 2.621834  | 1.307456  |

### Tellurophene

| Center | Atomic | Atomic | Coordinates (Angstroms) |  |  |
|--------|--------|--------|-------------------------|--|--|
| S29    |        |        |                         |  |  |

| Number | Number | Type | X         | Y         | Z         |
|--------|--------|------|-----------|-----------|-----------|
| -----  |        |      |           |           |           |
| 1      | 6      | 0    | 0.000632  | 0.787992  | 1.360178  |
| 2      | 6      | 0    | 0.000632  | 2.009918  | 0.725547  |
| 3      | 6      | 0    | 0.000632  | 2.009918  | -0.725547 |
| 4      | 6      | 0    | 0.000632  | 0.787992  | -1.360178 |
| 5      | 1      | 0    | 0.000945  | 0.629940  | -2.431925 |
| 6      | 1      | 0    | 0.000945  | 0.629940  | 2.431925  |
| 7      | 52     | 0    | -0.000367 | -0.783054 | 0.000000  |
| 8      | 1      | 0    | 0.001025  | 2.941995  | 1.286845  |
| 9      | 1      | 0    | 0.001025  | 2.941995  | -1.286845 |
| -----  |        |      |           |           |           |

### Optimization of CPX

### CPO

| Center | Atomic | Atomic | Coordinates (Angstroms) |           |           |
|--------|--------|--------|-------------------------|-----------|-----------|
| Number | Number | Type   | X                       | Y         | Z         |
| -----  |        |        |                         |           |           |
| 1      | 6      | 0      | -0.109217               | -0.723756 | 0.049014  |
| 2      | 6      | 0      | -0.109218               | 0.723755  | 0.049015  |
| 3      | 6      | 0      | 2.159390                | 0.000000  | -0.249924 |
| 4      | 6      | 0      | 1.301988                | -1.259723 | 0.132689  |
| 5      | 1      | 0      | 1.533551                | -1.590547 | 1.155494  |
| 6      | 1      | 0      | 1.495179                | -2.106822 | -0.535586 |
| 7      | 6      | 0      | 1.301987                | 1.259723  | 0.132690  |
| 8      | 1      | 0      | 1.495176                | 2.106823  | -0.535585 |
| 9      | 1      | 0      | 1.533549                | 1.590547  | 1.155495  |

|    |   |   |           |           |           |
|----|---|---|-----------|-----------|-----------|
| 10 | 1 | 0 | 3.140280  | 0.000000  | 0.239681  |
| 11 | 1 | 0 | 2.328348  | 0.000000  | -1.334601 |
| 12 | 8 | 0 | -2.248285 | 0.000000  | -0.063460 |
| 13 | 6 | 0 | -1.413546 | -1.135355 | -0.018263 |
| 14 | 1 | 0 | -1.923417 | -2.084087 | -0.049480 |
| 15 | 6 | 0 | -1.413546 | 1.135354  | -0.018264 |
| 16 | 1 | 0 | -1.923415 | 2.084088  | -0.049483 |

CPS

| Center<br>Number | Atomic<br>Number | Atomic<br>Type | Coordinates (Angstroms) |           |           |
|------------------|------------------|----------------|-------------------------|-----------|-----------|
|                  |                  |                | X                       | Y         | Z         |
| 1                | 6                | 0              | -0.059164               | -1.012928 | 1.280570  |
| 2                | 6                | 0              | -0.050702               | 0.238762  | 0.724773  |
| 3                | 6                | 0              | -0.050702               | 0.238762  | -0.724773 |
| 4                | 6                | 0              | -0.059164               | -1.012928 | -1.280570 |
| 5                | 16               | 0              | -0.066491               | -2.285372 | 0.000000  |
| 6                | 6                | 0              | 0.415896                | 2.485564  | 0.000000  |
| 7                | 6                | 0              | -0.050702               | 1.664146  | 1.248795  |
| 8                | 1                | 0              | -1.065829               | 1.962644  | 1.549654  |
| 9                | 1                | 0              | 0.603809                | 1.813044  | 2.115198  |
| 10               | 6                | 0              | -0.050702               | 1.664146  | -1.248795 |
| 11               | 1                | 0              | 0.603809                | 1.813044  | -2.115198 |
| 12               | 1                | 0              | -1.065829               | 1.962644  | -1.549654 |
| 13               | 1                | 0              | 0.021940                | 3.508671  | 0.000000  |
| 14               | 1                | 0              | 1.511904                | 2.548939  | 0.000000  |
| 15               | 1                | 0              | -0.057253               | -1.318092 | -2.316964 |

|    |   |   |           |           |          |
|----|---|---|-----------|-----------|----------|
| 16 | 1 | 0 | -0.057253 | -1.318092 | 2.316964 |
|----|---|---|-----------|-----------|----------|

-----

**CPSe**

-----

| Center | Atomic | Atomic | Coordinates (Angstroms) |   |   |
|--------|--------|--------|-------------------------|---|---|
| Number | Number | Type   | X                       | Y | Z |

-----

|    |    |   |           |           |           |
|----|----|---|-----------|-----------|-----------|
| 1  | 6  | 0 | -0.043983 | -0.466809 | 1.319705  |
| 2  | 6  | 0 | -0.036217 | 0.766780  | 0.726349  |
| 3  | 6  | 0 | -0.036217 | 0.766780  | -0.726349 |
| 4  | 6  | 0 | -0.043983 | -0.466809 | -1.319705 |
| 5  | 6  | 0 | 0.441491  | 3.013684  | 0.000000  |
| 6  | 6  | 0 | -0.036217 | 2.196652  | 1.245384  |
| 7  | 1  | 0 | -1.053828 | 2.497831  | 1.535803  |
| 8  | 1  | 0 | 0.610264  | 2.344757  | 2.117922  |
| 9  | 6  | 0 | -0.036217 | 2.196652  | -1.245384 |
| 10 | 1  | 0 | 0.610264  | 2.344757  | -2.117922 |
| 11 | 1  | 0 | -1.053828 | 2.497831  | -1.535803 |
| 12 | 1  | 0 | 0.059504  | 4.041397  | 0.000000  |
| 13 | 1  | 0 | 1.538275  | 3.063406  | 0.000000  |
| 14 | 34 | 0 | -0.055257 | -1.864473 | 0.000000  |
| 15 | 1  | 0 | -0.041920 | -0.719736 | -2.372067 |
| 16 | 1  | 0 | -0.041920 | -0.719736 | 2.372067  |

-----

**CPTe**

-----

| Center | Atomic | Atomic | Coordinates (Angstroms) |  |     |
|--------|--------|--------|-------------------------|--|-----|
|        |        |        |                         |  | S32 |



| Number | Number | Type | X         | Y         | Z         |
|--------|--------|------|-----------|-----------|-----------|
| -----  |        |      |           |           |           |
| 1      | 6      | 0    | 0.033597  | 0.040656  | 1.372004  |
| 2      | 6      | 0    | 0.033597  | -1.168595 | 0.729215  |
| 3      | 6      | 0    | 0.033597  | -1.168595 | -0.729215 |
| 4      | 6      | 0    | 0.033597  | 0.040656  | -1.372004 |
| 5      | 6      | 0    | -0.448004 | -3.418186 | 0.000000  |
| 6      | 6      | 0    | 0.039165  | -2.603995 | 1.240930  |
| 7      | 1      | 0    | 1.060798  | -2.903854 | 1.519025  |
| 8      | 1      | 0    | -0.596643 | -2.753071 | 2.121082  |
| 9      | 6      | 0    | 0.039165  | -2.603995 | -1.240930 |
| 10     | 1      | 0    | -0.596643 | -2.753071 | -2.121082 |
| 11     | 1      | 0    | 1.060798  | -2.903854 | -1.519025 |
| 12     | 1      | 0    | -0.075337 | -4.449398 | 0.000000  |
| 13     | 1      | 0    | -1.545225 | -3.457391 | 0.000000  |
| 14     | 52     | 0    | 0.039333  | 1.617167  | 0.000000  |
| 15     | 1      | 0    | 0.029320  | 0.210138  | -2.442433 |
| 16     | 1      | 0    | 0.029320  | 0.210138  | 2.442433  |
| -----  |        |      |           |           |           |

## Optimization of 2CPX

### 2CPO

| -----  |        |        |                         |           |           |
|--------|--------|--------|-------------------------|-----------|-----------|
| Center | Atomic | Atomic | Coordinates (Angstroms) |           |           |
| Number | Number | Type   | X                       | Y         | Z         |
| -----  |        |        |                         |           |           |
| 1      | 6      | 0      | 2.848837                | 0.906486  | -0.045631 |
| 2      | 6      | 0      | 1.939665                | -0.212860 | -0.062215 |

|    |   |   |           |           |           |
|----|---|---|-----------|-----------|-----------|
| 3  | 6 | 0 | 4.148381  | -1.091093 | 0.245873  |
| 4  | 6 | 0 | 4.282684  | 0.432444  | -0.117350 |
| 5  | 1 | 0 | 4.681933  | 0.555964  | -1.134426 |
| 6  | 1 | 0 | 4.958613  | 0.960736  | 0.564862  |
| 7  | 6 | 0 | 2.687559  | -1.520676 | -0.140157 |
| 8  | 1 | 0 | 2.288019  | -2.292329 | 0.526456  |
| 9  | 1 | 0 | 2.653425  | -1.929269 | -1.160623 |
| 10 | 1 | 0 | 4.908340  | -1.704196 | -0.252432 |
| 11 | 1 | 0 | 4.281025  | -1.211770 | 1.328938  |
| 12 | 8 | 0 | 0.731000  | 1.700941  | 0.046397  |
| 13 | 6 | 0 | 2.099754  | 2.051864  | 0.018692  |
| 14 | 1 | 0 | 2.304362  | 3.108814  | 0.057723  |
| 15 | 6 | 0 | 0.658411  | 0.288033  | -0.007707 |
| 16 | 6 | 0 | -1.939658 | 0.212867  | 0.062113  |
| 17 | 6 | 0 | -2.848814 | -0.906489 | 0.045530  |
| 18 | 6 | 0 | -4.148480 | 1.091106  | -0.245249 |
| 19 | 6 | 0 | -2.687561 | 1.520649  | 0.140476  |
| 20 | 1 | 0 | -2.653208 | 1.929010  | 1.161030  |
| 21 | 1 | 0 | -2.288216 | 2.292468  | -0.526059 |
| 22 | 6 | 0 | -4.282647 | -0.432506 | 0.117737  |
| 23 | 1 | 0 | -4.958758 | -0.960693 | -0.564384 |
| 24 | 1 | 0 | -4.681612 | -0.556207 | 1.134899  |
| 25 | 1 | 0 | -4.908302 | 1.704099  | 0.253397  |
| 26 | 1 | 0 | -4.281431 | 1.211985  | -1.328250 |
| 27 | 8 | 0 | -0.730982 | -1.700903 | -0.047000 |
| 28 | 6 | 0 | -0.658405 | -0.288000 | 0.007325  |
| 29 | 6 | 0 | -2.099728 | -2.051847 | -0.019098 |
| 30 | 1 | 0 | -2.304328 | -3.108790 | -0.058343 |

## 2CPS

| -----  |        |        |                         |           |           |  |
|--------|--------|--------|-------------------------|-----------|-----------|--|
| Center | Atomic | Atomic | Coordinates (Angstroms) |           |           |  |
| Number | Number | Type   | X                       | Y         | Z         |  |
| -----  |        |        |                         |           |           |  |
| 1      | 6      | 0      | 2.993584                | 0.745438  | -0.060006 |  |
| 2      | 6      | 0      | 1.923483                | -0.223784 | -0.052582 |  |
| 3      | 6      | 0      | 3.995264                | -1.413923 | 0.273173  |  |
| 4      | 6      | 0      | 4.340325                | 0.051989  | -0.148157 |  |
| 5      | 1      | 0      | 4.717217                | 0.079818  | -1.181152 |  |
| 6      | 1      | 0      | 5.107274                | 0.502883  | 0.491911  |  |
| 7      | 6      | 0      | 2.494289                | -1.630453 | -0.112952 |  |
| 8      | 1      | 0      | 1.995204                | -2.335117 | 0.561540  |  |
| 9      | 1      | 0      | 2.404882                | -2.041819 | -1.129738 |  |
| 10     | 1      | 0      | 4.656806                | -2.152110 | -0.194891 |  |
| 11     | 1      | 0      | 4.103347                | -1.511251 | 1.361261  |  |
| 12     | 6      | 0      | 2.576744                | 2.048244  | -0.004272 |  |
| 13     | 1      | 0      | 3.148388                | 2.964962  | 0.007313  |  |
| 14     | 6      | 0      | 0.651214                | 0.315503  | -0.003736 |  |
| 15     | 6      | 0      | -1.923482               | 0.223784  | 0.052581  |  |
| 16     | 6      | 0      | -2.993585               | -0.745437 | 0.060006  |  |
| 17     | 6      | 0      | -3.995260               | 1.413924  | -0.273187 |  |
| 18     | 6      | 0      | -2.494286               | 1.630454  | 0.112943  |  |
| 19     | 1      | 0      | -2.404883               | 2.041823  | 1.129728  |  |
| 20     | 1      | 0      | -1.995198               | 2.335114  | -0.561550 |  |
| 21     | 6      | 0      | -4.340325               | -0.051986 | 0.148149  |  |
| 22     | 1      | 0      | -5.107272               | -0.502881 | -0.491920 |  |
| 23     | 1      | 0      | -4.717221               | -0.079809 | 1.181142  |  |

|    |    |   |           |           |           |
|----|----|---|-----------|-----------|-----------|
| 24 | 1  | 0 | -4.656803 | 2.152114  | 0.194870  |
| 25 | 1  | 0 | -4.103338 | 1.511247  | -1.361276 |
| 26 | 6  | 0 | -0.651214 | -0.315505 | 0.003740  |
| 27 | 6  | 0 | -2.576746 | -2.048243 | 0.004278  |
| 28 | 1  | 0 | -3.148391 | -2.964961 | -0.007305 |
| 29 | 16 | 0 | 0.778890  | 2.146298  | 0.057774  |
| 30 | 16 | 0 | -0.778893 | -2.146300 | -0.057762 |

## 2CPSe

| Center<br>Number | Atomic<br>Number | Atomic<br>Type | Coordinates (Angstroms) |           |           |
|------------------|------------------|----------------|-------------------------|-----------|-----------|
|                  |                  |                | X                       | Y         | Z         |
| 1                | 6                | 0              | 3.095482                | 0.303801  | -0.073442 |
| 2                | 6                | 0              | 1.876215                | -0.474686 | -0.048863 |
| 3                | 6                | 0              | 3.732535                | -1.986747 | 0.290188  |
| 4                | 6                | 0              | 4.307380                | -0.608240 | -0.163753 |
| 5                | 1                | 0              | 4.666385                | -0.661421 | -1.202324 |
| 6                | 1                | 0              | 5.148153                | -0.277641 | 0.456665  |
| 7                | 6                | 0              | 2.216379                | -1.958638 | -0.088613 |
| 8                | 1                | 0              | 1.619235                | -2.564177 | 0.603509  |
| 9                | 1                | 0              | 2.055953                | -2.366705 | -1.098685 |
| 10               | 1                | 0              | 4.260157                | -2.833987 | -0.163038 |
| 11               | 1                | 0              | 3.828444                | -2.077305 | 1.380045  |
| 12               | 6                | 0              | 2.945388                | 1.663464  | -0.030664 |
| 13               | 1                | 0              | 3.706287                | 2.433520  | -0.037098 |
| 14               | 6                | 0              | 0.686517                | 0.232454  | -0.006373 |
| 15               | 6                | 0              | -1.876225               | 0.474690  | 0.048854  |

|    |    |   |           |           |           |
|----|----|---|-----------|-----------|-----------|
| 16 | 6  | 0 | -3.095483 | -0.303810 | 0.073441  |
| 17 | 6  | 0 | -3.732566 | 1.986726  | -0.290206 |
| 18 | 6  | 0 | -2.216409 | 1.958639  | 0.088591  |
| 19 | 1  | 0 | -2.055985 | 2.366717  | 1.098658  |
| 20 | 1  | 0 | -1.619276 | 2.564179  | -0.603539 |
| 21 | 6  | 0 | -4.307393 | 0.608217  | 0.163748  |
| 22 | 1  | 0 | -5.148163 | 0.277602  | -0.456664 |
| 23 | 1  | 0 | -4.666395 | 0.661402  | 1.202319  |
| 24 | 1  | 0 | -4.260198 | 2.833964  | 0.163014  |
| 25 | 1  | 0 | -3.828480 | 2.077273  | -1.380064 |
| 26 | 6  | 0 | -0.686519 | -0.232439 | 0.006371  |
| 27 | 6  | 0 | -2.945375 | -1.663472 | 0.030672  |
| 28 | 1  | 0 | -3.706265 | -2.433536 | 0.037114  |
| 29 | 34 | 0 | 1.097224  | 2.148392  | 0.039763  |
| 30 | 34 | 0 | -1.097206 | -2.148382 | -0.039751 |

## 2CPTe

| Center<br>Number | Atomic<br>Number | Atomic<br>Type | Coordinates (Angstroms) |           |           |
|------------------|------------------|----------------|-------------------------|-----------|-----------|
|                  |                  |                | X                       | Y         | Z         |
| 1                | 6                | 0              | 3.055608                | -0.750725 | -0.086324 |
| 2                | 6                | 0              | 1.632056                | -1.039017 | -0.044616 |
| 3                | 6                | 0              | 2.842495                | -3.115149 | 0.309874  |
| 4                | 6                | 0              | 3.855456                | -2.041385 | -0.183883 |
| 5                | 1                | 0              | 4.140589                | -2.230662 | -1.229629 |
| 6                | 1                | 0              | 4.777007                | -2.023340 | 0.408880  |
| 7                | 6                | 0              | 1.433227                | -2.553141 | -0.058592 |

|    |    |   |           |           |           |
|----|----|---|-----------|-----------|-----------|
| 8  | 1  | 0 | 0.678359  | -2.901728 | 0.657970  |
| 9  | 1  | 0 | 1.124371  | -2.897641 | -1.058119 |
| 10 | 1  | 0 | 3.023679  | -4.104033 | -0.126931 |
| 11 | 1  | 0 | 2.916853  | -3.211513 | 1.400828  |
| 12 | 6  | 0 | 3.465187  | 0.555440  | -0.051529 |
| 13 | 1  | 0 | 4.488798  | 0.911161  | -0.075848 |
| 14 | 6  | 0 | 0.726711  | 0.014179  | -0.007933 |
| 15 | 6  | 0 | -1.632072 | 1.039025  | 0.044631  |
| 16 | 6  | 0 | -3.055621 | 0.750712  | 0.086332  |
| 17 | 6  | 0 | -2.842546 | 3.115143  | -0.309835 |
| 18 | 6  | 0 | -1.433270 | 2.553153  | 0.058623  |
| 19 | 1  | 0 | -1.124418 | 2.897646  | 1.058153  |
| 20 | 1  | 0 | -0.678412 | 2.901764  | -0.657937 |
| 21 | 6  | 0 | -3.855490 | 2.041357  | 0.183909  |
| 22 | 1  | 0 | -4.777041 | 2.023304  | -0.408854 |
| 23 | 1  | 0 | -4.140626 | 2.230616  | 1.229658  |
| 24 | 1  | 0 | -3.023746 | 4.104019  | 0.126983  |
| 25 | 1  | 0 | -2.916908 | 3.211520  | -1.400787 |
| 26 | 6  | 0 | -0.726713 | -0.014159 | 0.007939  |
| 27 | 6  | 0 | -3.465181 | -0.555459 | 0.051520  |
| 28 | 1  | 0 | -4.488787 | -0.911195 | 0.075833  |
| 29 | 52 | 0 | 1.841546  | 1.842640  | 0.032563  |
| 30 | 52 | 0 | -1.841523 | -1.842635 | -0.032580 |

---

### Optimization of 3CPX

### 3CPO

---

| Center | Atomic | Atomic | Coordinates (Angstroms) |           |           |
|--------|--------|--------|-------------------------|-----------|-----------|
| Number | Number | Type   | X                       | Y         | Z         |
| -----  |        |        |                         |           |           |
| 1      | 6      | 0      | 0.717300                | 2.224836  | 0.066709  |
| 2      | 6      | 0      | -0.717312               | 2.224837  | 0.066772  |
| 3      | 6      | 0      | -0.000030               | 4.493617  | -0.227850 |
| 4      | 6      | 0      | 1.262319                | 3.630004  | 0.134055  |
| 5      | 1      | 0      | 1.620644                | 3.858622  | 1.148223  |
| 6      | 1      | 0      | 2.100919                | 3.805410  | -0.548136 |
| 7      | 6      | 0      | -1.262337               | 3.629994  | 0.134191  |
| 8      | 1      | 0      | -2.101012               | 3.805386  | -0.547919 |
| 9      | 1      | 0      | -1.620572               | 3.858592  | 1.148391  |
| 10     | 1      | 0      | -0.000003               | 5.462658  | 0.284603  |
| 11     | 1      | 0      | -0.000082               | 4.689188  | -1.308109 |
| 12     | 8      | 0      | -0.000013               | 0.073390  | -0.018579 |
| 13     | 6      | 0      | 1.142295                | 0.914011  | 0.016827  |
| 14     | 6      | 0      | -1.142326               | 0.914022  | 0.016964  |
| 15     | 6      | 0      | -2.851898               | -1.044679 | -0.058534 |
| 16     | 6      | 0      | -4.293368               | -1.031078 | -0.059892 |
| 17     | 6      | 0      | -3.588717               | -3.303969 | 0.255661  |
| 18     | 6      | 0      | -2.321439               | -2.455658 | -0.120844 |
| 19     | 1      | 0      | -1.973099               | -2.697371 | -1.135762 |
| 20     | 1      | 0      | -1.481220               | -2.636545 | 0.558307  |
| 21     | 6      | 0      | -4.842520               | -2.437903 | -0.129531 |
| 22     | 1      | 0      | -5.689299               | -2.616878 | 0.542988  |
| 23     | 1      | 0      | -5.179185               | -2.673084 | -1.149533 |
| 24     | 1      | 0      | -3.595282               | -4.284004 | -0.235560 |
| 25     | 1      | 0      | -3.593986               | -3.474841 | 1.340069  |
| 26     | 8      | 0      | -3.557081               | 1.107773  | 0.026294  |

|    |   |   |           |           |           |
|----|---|---|-----------|-----------|-----------|
| 27 | 6 | 0 | -2.420562 | 0.263237  | -0.008174 |
| 28 | 6 | 0 | -4.699408 | 0.276674  | -0.009673 |
| 29 | 1 | 0 | -5.644757 | 0.792636  | 0.014455  |
| 30 | 6 | 0 | 4.293366  | -1.031071 | -0.060095 |
| 31 | 6 | 0 | 2.851881  | -1.044696 | -0.058218 |
| 32 | 6 | 0 | 3.588882  | -3.303795 | 0.256915  |
| 33 | 6 | 0 | 4.842504  | -2.437917 | -0.129284 |
| 34 | 1 | 0 | 5.178673  | -2.673580 | -1.149341 |
| 35 | 1 | 0 | 5.689603  | -2.616583 | 0.542914  |
| 36 | 6 | 0 | 2.321439  | -2.455725 | -0.119561 |
| 37 | 1 | 0 | 1.481483  | -2.636291 | 0.559999  |
| 38 | 1 | 0 | 1.972740  | -2.698003 | -1.134225 |
| 39 | 1 | 0 | 3.595257  | -4.284105 | -0.233752 |
| 40 | 1 | 0 | 3.594593  | -3.474040 | 1.341421  |
| 41 | 8 | 0 | 3.557063  | 1.107826  | 0.025242  |
| 42 | 6 | 0 | 4.699396  | 0.276713  | -0.010656 |
| 43 | 6 | 0 | 2.420552  | 0.263247  | -0.008374 |
| 44 | 1 | 0 | 5.644737  | 0.792715  | 0.012883  |

-----

**3CPS**

-----

| Center | Atomic | Atomic | Coordinates (Angstroms) |          |           |
|--------|--------|--------|-------------------------|----------|-----------|
| Number | Number | Type   | X                       | Y        | Z         |
| -----  |        |        |                         |          |           |
| 1      | 6      | 0      | 0.718191                | 1.860059 | 0.037652  |
| 2      | 6      | 0      | -0.718192               | 1.860059 | 0.037651  |
| 3      | 6      | 0      | -0.000000               | 4.138118 | -0.274377 |
| 4      | 6      | 0      | 1.249131                | 3.280693 | 0.107980  |
| S40    |        |        |                         |          |           |



|    |   |   |           |           |           |
|----|---|---|-----------|-----------|-----------|
| 5  | 1 | 0 | 1.592452  | 3.513694  | 1.127116  |
| 6  | 1 | 0 | 2.094818  | 3.464974  | -0.563768 |
| 7  | 6 | 0 | -1.249132 | 3.280693  | 0.107979  |
| 8  | 1 | 0 | -2.094818 | 3.464974  | -0.563771 |
| 9  | 1 | 0 | -1.592454 | 3.513693  | 1.127113  |
| 10 | 1 | 0 | -0.000001 | 5.117932  | 0.216831  |
| 11 | 1 | 0 | 0.000001  | 4.309328  | -1.358597 |
| 12 | 6 | 0 | 1.310199  | 0.610005  | -0.004841 |
| 13 | 6 | 0 | -1.310199 | 0.610005  | -0.004843 |
| 14 | 6 | 0 | -3.287906 | -1.039279 | -0.054447 |
| 15 | 6 | 0 | -4.730925 | -1.031476 | -0.050702 |
| 16 | 6 | 0 | -4.034476 | -3.309796 | 0.265107  |
| 17 | 6 | 0 | -2.775472 | -2.467762 | -0.127992 |
| 18 | 1 | 0 | -2.444590 | -2.708979 | -1.149538 |
| 19 | 1 | 0 | -1.927559 | -2.664100 | 0.537657  |
| 20 | 6 | 0 | -5.272662 | -2.445877 | -0.141958 |
| 21 | 1 | 0 | -6.139619 | -2.624703 | 0.504241  |
| 22 | 1 | 0 | -5.580369 | -2.671181 | -1.173686 |
| 23 | 1 | 0 | -4.038890 | -4.298995 | -0.207287 |
| 24 | 1 | 0 | -4.040952 | -3.458965 | 1.352680  |
| 25 | 6 | 0 | -2.698924 | 0.212492  | -0.003566 |
| 26 | 6 | 0 | -5.290175 | 0.216661  | 0.015752  |
| 27 | 1 | 0 | -6.327726 | 0.517202  | 0.036737  |
| 28 | 6 | 0 | 4.730925  | -1.031475 | -0.050702 |
| 29 | 6 | 0 | 3.287906  | -1.039278 | -0.054454 |
| 30 | 6 | 0 | 4.034475  | -3.309800 | 0.265073  |
| 31 | 6 | 0 | 5.272663  | -2.445875 | -0.141973 |
| 32 | 1 | 0 | 5.580376  | -2.671166 | -1.173702 |
| 33 | 1 | 0 | 6.139617  | -2.624709 | 0.504228  |

|    |    |   |           |           |           |
|----|----|---|-----------|-----------|-----------|
| 34 | 6  | 0 | 2.775473  | -2.467760 | -0.128019 |
| 35 | 1  | 0 | 1.927557  | -2.664107 | 0.537623  |
| 36 | 1  | 0 | 2.444594  | -2.708964 | -1.149570 |
| 37 | 1  | 0 | 4.038891  | -4.298992 | -0.207334 |
| 38 | 1  | 0 | 4.040945  | -3.458984 | 1.352644  |
| 39 | 6  | 0 | 5.290175  | 0.216662  | 0.015770  |
| 40 | 6  | 0 | 2.698924  | 0.212493  | -0.003562 |
| 41 | 1  | 0 | 6.327726  | 0.517202  | 0.036763  |
| 42 | 16 | 0 | -4.017134 | 1.489735  | 0.074839  |
| 43 | 16 | 0 | -0.000000 | -0.668377 | -0.065677 |
| 44 | 16 | 0 | 4.017133  | 1.489734  | 0.074866  |

### 3CPSe

| Center<br>Number | Atomic<br>Number | Atomic<br>Type | Coordinates (Angstroms) |           |           |
|------------------|------------------|----------------|-------------------------|-----------|-----------|
|                  |                  |                | X                       | Y         | Z         |
| 1                | 6                | 0              | 0.719819                | -1.612264 | -0.000451 |
| 2                | 6                | 0              | -0.719826               | -1.612254 | -0.000455 |
| 3                | 6                | 0              | -0.000024               | -3.892315 | 0.339034  |
| 4                | 6                | 0              | 1.244892                | -3.039305 | -0.054119 |
| 5                | 1                | 0              | 1.588941                | -3.285918 | -1.070471 |
| 6                | 1                | 0              | 2.085814                | -3.221350 | 0.625381  |
| 7                | 6                | 0              | -1.244922               | -3.039286 | -0.054131 |
| 8                | 1                | 0              | -2.085856               | -3.221316 | 0.625359  |
| 9                | 1                | 0              | -1.588964               | -3.285892 | -1.070487 |
| 10               | 1                | 0              | -0.000030               | -4.878494 | -0.139084 |
| 11               | 1                | 0              | -0.000031               | -4.048791 | 1.425467  |

|    |   |   |           |           |           |
|----|---|---|-----------|-----------|-----------|
| 12 | 6 | 0 | 1.355672  | -0.380984 | 0.025070  |
| 13 | 6 | 0 | -1.355664 | -0.380969 | 0.025067  |
| 14 | 6 | 0 | -3.395077 | 1.186920  | 0.051456  |
| 15 | 6 | 0 | -4.840871 | 1.178341  | 0.043961  |
| 16 | 6 | 0 | -4.152025 | 3.460165  | -0.275647 |
| 17 | 6 | 0 | -2.893192 | 2.623288  | 0.121070  |
| 18 | 1 | 0 | -2.563052 | 2.869994  | 1.142292  |
| 19 | 1 | 0 | -2.050249 | 2.826883  | -0.549941 |
| 20 | 6 | 0 | -5.382764 | 2.594581  | 0.139705  |
| 21 | 1 | 0 | -6.255999 | 2.770605  | -0.498703 |
| 22 | 1 | 0 | -5.681947 | 2.817755  | 1.174614  |
| 23 | 1 | 0 | -4.157364 | 4.452589  | 0.189858  |
| 24 | 1 | 0 | -4.160469 | 3.601212  | -1.364370 |
| 25 | 6 | 0 | -2.763429 | -0.046649 | 0.009988  |
| 26 | 6 | 0 | -5.438499 | -0.051336 | -0.025852 |
| 27 | 1 | 0 | -6.492923 | -0.295942 | -0.044934 |
| 28 | 6 | 0 | 4.840863  | 1.178353  | 0.043966  |
| 29 | 6 | 0 | 3.395069  | 1.186912  | 0.051469  |
| 30 | 6 | 0 | 4.151980  | 3.460171  | -0.275614 |
| 31 | 6 | 0 | 5.382735  | 2.594601  | 0.139720  |
| 32 | 1 | 0 | 5.681922  | 2.817768  | 1.174630  |
| 33 | 1 | 0 | 6.255963  | 2.770644  | -0.498692 |
| 34 | 6 | 0 | 2.893162  | 2.623271  | 0.121104  |
| 35 | 1 | 0 | 2.050209  | 2.826858  | -0.549896 |
| 36 | 1 | 0 | 2.563027  | 2.869960  | 1.142332  |
| 37 | 1 | 0 | 4.157307  | 4.452590  | 0.189902  |
| 38 | 1 | 0 | 4.160413  | 3.601229  | -1.364336 |
| 39 | 6 | 0 | 5.438507  | -0.051314 | -0.025862 |
| 40 | 6 | 0 | 2.763437  | -0.046662 | 0.009990  |

|    |    |   |           |           |           |
|----|----|---|-----------|-----------|-----------|
| 41 | 1  | 0 | 6.492935  | -0.295906 | -0.044952 |
| 42 | 34 | 0 | -4.133385 | -1.446697 | -0.082701 |
| 43 | 34 | 0 | 0.000012  | 1.018563  | 0.078634  |
| 44 | 34 | 0 | 4.133411  | -1.446691 | -0.082720 |

### 3CPTe

| Center<br>Number | Atomic<br>Number | Atomic<br>Type | Coordinates (Angstroms) |           |           |
|------------------|------------------|----------------|-------------------------|-----------|-----------|
|                  |                  |                | X                       | Y         | Z         |
| 1                | 6                | 0              | 0.723716                | -1.372193 | 0.080260  |
| 2                | 6                | 0              | -0.723727               | -1.372184 | 0.080257  |
| 3                | 6                | 0              | -0.000025               | -3.644474 | 0.513516  |
| 4                | 6                | 0              | 1.237544                | -2.807914 | 0.081298  |
| 5                | 1                | 0              | 1.577053                | -3.100053 | -0.924888 |
| 6                | 1                | 0              | 2.074145                | -2.969292 | 0.772748  |
| 7                | 6                | 0              | -1.237577               | -2.807896 | 0.081287  |
| 8                | 1                | 0              | -2.074189               | -2.969262 | 0.772727  |
| 9                | 1                | 0              | -1.577080               | -3.100029 | -0.924903 |
| 10               | 1                | 0              | -0.000030               | -4.650391 | 0.078821  |
| 11               | 1                | 0              | -0.000030               | -3.751986 | 1.605613  |
| 12               | 6                | 0              | 1.421976                | -0.169234 | 0.062942  |
| 13               | 6                | 0              | -1.421974               | -0.169219 | 0.062940  |
| 14               | 6                | 0              | -3.548380               | 1.274789  | 0.051876  |
| 15               | 6                | 0              | -5.000053               | 1.259084  | 0.029338  |
| 16               | 6                | 0              | -4.333021               | 3.550236  | -0.282875 |
| 17               | 6                | 0              | -3.071212               | 2.724375  | 0.120450  |
| 18               | 1                | 0              | -2.744683               | 2.980361  | 1.140624  |

|    |    |   |           |           |           |
|----|----|---|-----------|-----------|-----------|
| 19 | 1  | 0 | -2.236203 | 2.943582  | -0.557413 |
| 20 | 6  | 0 | -5.549077 | 2.674044  | 0.136206  |
| 21 | 1  | 0 | -6.430418 | 2.843131  | -0.492753 |
| 22 | 1  | 0 | -5.840544 | 2.888091  | 1.175416  |
| 23 | 1  | 0 | -4.345249 | 4.544422  | 0.178604  |
| 24 | 1  | 0 | -4.340471 | 3.685862  | -1.372216 |
| 25 | 6  | 0 | -2.853349 | 0.069439  | 0.023943  |
| 26 | 6  | 0 | -5.646475 | 0.054685  | -0.059766 |
| 27 | 1  | 0 | -6.718924 | -0.100672 | -0.084630 |
| 28 | 6  | 0 | 5.000040  | 1.259097  | 0.029340  |
| 29 | 6  | 0 | 3.548367  | 1.274782  | 0.051882  |
| 30 | 6  | 0 | 4.332974  | 3.550241  | -0.282870 |
| 31 | 6  | 0 | 5.549044  | 2.674065  | 0.136206  |
| 32 | 1  | 0 | 5.840512  | 2.888115  | 1.175416  |
| 33 | 1  | 0 | 6.430381  | 2.843165  | -0.492755 |
| 34 | 6  | 0 | 3.071177  | 2.724362  | 0.120460  |
| 35 | 1  | 0 | 2.236160  | 2.943555  | -0.557397 |
| 36 | 1  | 0 | 2.744651  | 2.980340  | 1.140637  |
| 37 | 1  | 0 | 4.345189  | 4.544426  | 0.178609  |
| 38 | 1  | 0 | 4.340417  | 3.685867  | -1.372211 |
| 39 | 6  | 0 | 5.646478  | 0.054706  | -0.059768 |
| 40 | 6  | 0 | 2.853350  | 0.069426  | 0.023948  |
| 41 | 1  | 0 | 6.718928  | -0.100636 | -0.084635 |
| 42 | 52 | 0 | -4.292467 | -1.513278 | -0.113651 |
| 43 | 52 | 0 | 0.000009  | 1.406361  | 0.085754  |
| 44 | 52 | 0 | 4.292489  | -1.513273 | -0.113654 |

-----

#### 4CPO

| -----  |        |        |                         |           |           |  |
|--------|--------|--------|-------------------------|-----------|-----------|--|
| Center | Atomic | Atomic | Coordinates (Angstroms) |           |           |  |
| Number | Number | Type   | X                       | Y         | Z         |  |
| -----  |        |        |                         |           |           |  |
| 1      | 6      | 0      | 0.623935                | -1.851141 | 0.063170  |  |
| 2      | 6      | 0      | 2.012999                | -2.205552 | 0.065704  |  |
| 3      | 6      | 0      | 0.759246                | -4.227293 | -0.229805 |  |
| 4      | 6      | 0      | -0.251118               | -3.078469 | 0.130139  |  |
| 5      | 1      | 0      | -0.656088               | -3.211547 | 1.143962  |  |
| 6      | 1      | 0      | -1.105456               | -3.042644 | -0.554473 |  |
| 7      | 6      | 0      | 2.194832                | -3.701599 | 0.134293  |  |
| 8      | 1      | 0      | 2.965325                | -4.078716 | -0.546495 |  |
| 9      | 1      | 0      | 2.484089                | -4.010991 | 1.149062  |  |
| 10     | 1      | 0      | 0.519187                | -5.166195 | 0.282588  |  |
| 11     | 1      | 0      | 0.712869                | -4.416974 | -1.310120 |  |
| 12     | 8      | 0      | 1.851585                | 0.056385  | -0.020823 |  |
| 13     | 6      | 0      | 0.535739                | -0.474321 | 0.012952  |  |
| 14     | 6      | 0      | 2.750062                | -1.040680 | 0.016627  |  |
| 15     | 6      | 0      | 4.891863                | 0.432645  | -0.056079 |  |
| 16     | 6      | 0      | 6.284770                | 0.061875  | -0.054420 |  |
| 17     | 6      | 0      | 6.165388                | 2.438763  | 0.259169  |  |
| 18     | 6      | 0      | 4.728072                | 1.931051  | -0.119859 |  |
| 19     | 1      | 0      | 4.452734                | 2.250848  | -1.135603 |  |
| 20     | 1      | 0      | 3.957547                | 2.315313  | 0.557270  |  |
| 21     | 6      | 0      | 7.165921                | 1.288450  | -0.123152 |  |
| 22     | 1      | 0      | 8.029274                | 1.252192  | 0.551119  |  |
| 23     | 1      | 0      | 7.552443                | 1.431961  | -1.142493 |  |

|    |   |   |           |           |           |
|----|---|---|-----------|-----------|-----------|
| 24 | 1 | 0 | 6.415782  | 3.386118  | -0.232319 |
| 25 | 1 | 0 | 6.210682  | 2.603905  | 1.343525  |
| 26 | 8 | 0 | 5.040892  | -1.827684 | 0.030921  |
| 27 | 6 | 0 | 4.149341  | -0.727510 | -0.006140 |
| 28 | 6 | 0 | 6.353694  | -1.305738 | -0.002955 |
| 29 | 1 | 0 | 7.141592  | -2.039916 | 0.023282  |
| 30 | 6 | 0 | -6.284770 | -0.061868 | 0.054455  |
| 31 | 6 | 0 | -4.891863 | -0.432639 | 0.056185  |
| 32 | 6 | 0 | -6.165385 | -2.438804 | -0.258769 |
| 33 | 6 | 0 | -7.165923 | -1.288432 | 0.123364  |
| 34 | 1 | 0 | -7.552457 | -1.431787 | 1.142722  |
| 35 | 1 | 0 | -8.029267 | -1.252277 | -0.550923 |
| 36 | 6 | 0 | -4.728074 | -1.931035 | 0.120201  |
| 37 | 1 | 0 | -3.957539 | -2.315405 | -0.556856 |
| 38 | 1 | 0 | -4.452753 | -2.250673 | 1.135999  |
| 39 | 1 | 0 | -6.415787 | -3.386084 | 0.232859  |
| 40 | 1 | 0 | -6.210665 | -2.604110 | -1.343101 |
| 41 | 8 | 0 | -5.040890 | 1.827678  | -0.031150 |
| 42 | 6 | 0 | -6.353693 | 1.305737  | 0.002791  |
| 43 | 1 | 0 | -7.141590 | 2.039912  | -0.023560 |
| 44 | 6 | 0 | -4.149340 | 0.727508  | 0.006082  |
| 45 | 6 | 0 | -2.013000 | 2.205550  | -0.065789 |
| 46 | 6 | 0 | -0.623935 | 1.851142  | -0.063260 |
| 47 | 6 | 0 | -0.759247 | 4.227297  | 0.229681  |
| 48 | 6 | 0 | -2.194835 | 3.701597  | -0.134396 |
| 49 | 1 | 0 | -2.484102 | 4.010974  | -1.149168 |
| 50 | 1 | 0 | -2.965323 | 4.078723  | 0.546392  |
| 51 | 6 | 0 | 0.251115  | 3.078471  | -0.130259 |
| 52 | 1 | 0 | 1.105463  | 3.042658  | 0.554341  |

|    |   |   |           |           |           |
|----|---|---|-----------|-----------|-----------|
| 53 | 1 | 0 | 0.656070  | 3.211534  | -1.144090 |
| 54 | 1 | 0 | -0.519194 | 5.166194  | -0.282725 |
| 55 | 1 | 0 | -0.712860 | 4.416991  | 1.309994  |
| 56 | 8 | 0 | -1.851583 | -0.056385 | 0.020753  |
| 57 | 6 | 0 | -2.750060 | 1.040678  | -0.016703 |
| 58 | 6 | 0 | -0.535737 | 0.474323  | -0.013025 |

#### 4CPS

| Center<br>Number | Atomic<br>Number | Atomic<br>Type | Coordinates (Angstroms) |           |           |
|------------------|------------------|----------------|-------------------------|-----------|-----------|
|                  |                  |                | X                       | Y         | Z         |
| 1                | 6                | 0              | -1.064935               | 1.618893  | 0.040205  |
| 2                | 6                | 0              | -2.485209               | 1.825022  | 0.038448  |
| 3                | 6                | 0              | -1.447927               | 3.976913  | -0.269766 |
| 4                | 6                | 0              | -0.335690               | 2.948674  | 0.113878  |
| 5                | 1                | 0              | 0.034929                | 3.128963  | 1.134197  |
| 6                | 1                | 0              | 0.528900                | 3.010771  | -0.556241 |
| 7                | 6                | 0              | -2.807574               | 3.306969  | 0.109508  |
| 8                | 1                | 0              | -3.616777               | 3.610963  | -0.563633 |
| 9                | 1                | 0              | -3.116083               | 3.585733  | 1.128264  |
| 10               | 1                | 0              | -1.308384               | 4.946284  | 0.222412  |
| 11               | 1                | 0              | -1.421445               | 4.146982  | -1.353842 |
| 12               | 6                | 0              | -0.657433               | 0.295074  | -0.001681 |
| 13               | 6                | 0              | -3.251772               | 0.672992  | -0.005029 |
| 14               | 6                | 0              | -5.445980               | -0.674116 | -0.056853 |
| 15               | 6                | 0              | -6.872649               | -0.458623 | -0.054536 |
| 16               | 6                | 0              | -6.511980               | -2.813689 | 0.260399  |



|    |   |   |           |           |           |
|----|---|---|-----------|-----------|-----------|
| 17 | 6 | 0 | -5.144413 | -2.161415 | -0.130690 |
| 18 | 1 | 0 | -4.850371 | -2.447250 | -1.151987 |
| 19 | 1 | 0 | -4.334470 | -2.478142 | 0.535839  |
| 20 | 6 | 0 | -7.612428 | -1.780192 | -0.147104 |
| 21 | 1 | 0 | -8.496620 | -1.832596 | 0.498356  |
| 22 | 1 | 0 | -7.948535 | -1.958249 | -1.179196 |
| 23 | 1 | 0 | -6.658211 | -3.791554 | -0.212936 |
| 24 | 1 | 0 | -6.541065 | -2.961255 | 1.347808  |
| 25 | 6 | 0 | -4.682704 | 0.479992  | -0.005100 |
| 26 | 6 | 0 | -7.246588 | 0.857045  | 0.011813  |
| 27 | 1 | 0 | -8.230173 | 1.303619  | 0.031843  |
| 28 | 6 | 0 | 6.872649  | 0.458624  | 0.054534  |
| 29 | 6 | 0 | 5.445980  | 0.674116  | 0.056849  |
| 30 | 6 | 0 | 6.511980  | 2.813688  | -0.260412 |
| 31 | 6 | 0 | 7.612428  | 1.780194  | 0.147096  |
| 32 | 1 | 0 | 7.948534  | 1.958255  | 1.179187  |
| 33 | 1 | 0 | 8.496619  | 1.832594  | -0.498364 |
| 34 | 6 | 0 | 5.144412  | 2.161416  | 0.130679  |
| 35 | 1 | 0 | 4.334469  | 2.478140  | -0.535852 |
| 36 | 1 | 0 | 4.850370  | 2.447256  | 1.151975  |
| 37 | 1 | 0 | 6.658210  | 3.791555  | 0.212918  |
| 38 | 1 | 0 | 6.541065  | 2.961248  | -1.347822 |
| 39 | 6 | 0 | 7.246588  | -0.857045 | -0.011809 |
| 40 | 1 | 0 | 8.230173  | -1.303619 | -0.031837 |
| 41 | 6 | 0 | 4.682704  | -0.479992 | 0.005101  |
| 42 | 6 | 0 | 2.485209  | -1.825022 | -0.038446 |
| 43 | 6 | 0 | 1.064935  | -1.618893 | -0.040203 |
| 44 | 6 | 0 | 1.447927  | -3.976914 | 0.269768  |
| 45 | 6 | 0 | 2.807574  | -3.306969 | -0.109507 |

|    |    |   |           |           |           |
|----|----|---|-----------|-----------|-----------|
| 46 | 1  | 0 | 3.116084  | -3.585733 | -1.128262 |
| 47 | 1  | 0 | 3.616777  | -3.610963 | 0.563635  |
| 48 | 6  | 0 | 0.335690  | -2.948674 | -0.113876 |
| 49 | 1  | 0 | -0.528900 | -3.010771 | 0.556243  |
| 50 | 1  | 0 | -0.034929 | -3.128963 | -1.134195 |
| 51 | 1  | 0 | 1.308384  | -4.946284 | -0.222411 |
| 52 | 1  | 0 | 1.421445  | -4.146983 | 1.353844  |
| 53 | 6  | 0 | 3.251772  | -0.672992 | 0.005030  |
| 54 | 6  | 0 | 0.657433  | -0.295074 | 0.001683  |
| 55 | 16 | 0 | 5.803725  | -1.933773 | -0.072395 |
| 56 | 16 | 0 | 2.139530  | 0.780899  | 0.064855  |
| 57 | 16 | 0 | -2.139529 | -0.780899 | -0.064854 |
| 58 | 16 | 0 | -5.803724 | 1.933773  | 0.072404  |

#### 4CPSe

| Center<br>Number | Atomic<br>Number | Atomic<br>Type | Coordinates (Angstroms) |          |           |
|------------------|------------------|----------------|-------------------------|----------|-----------|
|                  |                  |                | X                       | Y        | Z         |
| 1                | 6                | 0              | -1.236584               | 1.490179 | 0.012555  |
| 2                | 6                | 0              | -2.671123               | 1.593698 | 0.006138  |
| 3                | 6                | 0              | -1.788691               | 3.817067 | -0.323558 |
| 4                | 6                | 0              | -0.610524               | 2.875827 | 0.073056  |
| 5                | 1                | 0              | -0.254708               | 3.094344 | 1.091893  |
| 6                | 1                | 0              | 0.244155                | 2.999401 | -0.602402 |
| 7                | 6                | 0              | -3.093334               | 3.054452 | 0.061144  |
| 8                | 1                | 0              | -3.915534               | 3.297732 | -0.622047 |
| 9                | 1                | 0              | -3.424126               | 3.322366 | 1.076500  |

S50

|    |   |   |           |           |           |
|----|---|---|-----------|-----------|-----------|
| 10 | 1 | 0 | -1.720435 | 4.799620  | 0.157169  |
| 11 | 1 | 0 | -1.772214 | 3.975505  | -1.409618 |
| 12 | 6 | 0 | -0.689199 | 0.214704  | -0.010764 |
| 13 | 6 | 0 | -3.394983 | 0.411264  | -0.023928 |
| 14 | 6 | 0 | -5.541991 | -1.004862 | -0.061651 |
| 15 | 6 | 0 | -6.983225 | -0.891728 | -0.060069 |
| 16 | 6 | 0 | -6.462679 | -3.217986 | 0.257434  |
| 17 | 6 | 0 | -5.144998 | -2.473618 | -0.132402 |
| 18 | 1 | 0 | -4.829451 | -2.741546 | -1.152934 |
| 19 | 1 | 0 | -4.321805 | -2.739118 | 0.541434  |
| 20 | 6 | 0 | -7.625809 | -2.264845 | -0.160967 |
| 21 | 1 | 0 | -8.512138 | -2.378357 | 0.473548  |
| 22 | 1 | 0 | -7.936046 | -2.463830 | -1.197555 |
| 23 | 1 | 0 | -6.537842 | -4.206542 | -0.210212 |
| 24 | 1 | 0 | -6.485800 | -3.360061 | 1.345816  |
| 25 | 6 | 0 | -4.822764 | 0.179974  | -0.015168 |
| 26 | 6 | 0 | -7.490782 | 0.377870  | 0.009706  |
| 27 | 1 | 0 | -8.524867 | 0.697954  | 0.024857  |
| 28 | 6 | 0 | 6.983224  | 0.891731  | 0.060067  |
| 29 | 6 | 0 | 5.541990  | 1.004864  | 0.061647  |
| 30 | 6 | 0 | 6.462675  | 3.217987  | -0.257446 |
| 31 | 6 | 0 | 7.625806  | 2.264849  | 0.160960  |
| 32 | 1 | 0 | 7.936041  | 2.463839  | 1.197548  |
| 33 | 1 | 0 | 8.512136  | 2.378360  | -0.473555 |
| 34 | 6 | 0 | 5.144994  | 2.473619  | 0.132391  |
| 35 | 1 | 0 | 4.321802  | 2.739116  | -0.541445 |
| 36 | 1 | 0 | 4.829447  | 2.741552  | 1.152923  |
| 37 | 1 | 0 | 6.537837  | 4.206545  | 0.210196  |
| 38 | 1 | 0 | 6.485797  | 3.360058  | -1.345829 |

|    |    |   |           |           |           |
|----|----|---|-----------|-----------|-----------|
| 39 | 6  | 0 | 7.490782  | -0.377866 | -0.009703 |
| 40 | 1  | 0 | 8.524868  | -0.697950 | -0.024851 |
| 41 | 6  | 0 | 4.822764  | -0.179973 | 0.015168  |
| 42 | 6  | 0 | 2.671125  | -1.593699 | -0.006138 |
| 43 | 6  | 0 | 1.236585  | -1.490183 | -0.012555 |
| 44 | 6  | 0 | 1.788696  | -3.817070 | 0.323558  |
| 45 | 6  | 0 | 3.093337  | -3.054453 | -0.061145 |
| 46 | 1  | 0 | 3.424130  | -3.322366 | -1.076500 |
| 47 | 1  | 0 | 3.915538  | -3.297732 | 0.622047  |
| 48 | 6  | 0 | 0.610528  | -2.875831 | -0.073055 |
| 49 | 1  | 0 | -0.244151 | -2.999407 | 0.602404  |
| 50 | 1  | 0 | 0.254711  | -3.094349 | -1.091892 |
| 51 | 1  | 0 | 1.720441  | -4.799623 | -0.157170 |
| 52 | 1  | 0 | 1.772220  | -3.975508 | 1.409618  |
| 53 | 6  | 0 | 3.394983  | -0.411265 | 0.023928  |
| 54 | 6  | 0 | 0.689199  | -0.214708 | 0.010764  |
| 55 | 34 | 0 | 6.088599  | -1.675163 | -0.074559 |
| 56 | 34 | 0 | 2.144238  | 1.082324  | 0.072689  |
| 57 | 34 | 0 | -2.144240 | -1.082326 | -0.072689 |
| 58 | 34 | 0 | -6.088598 | 1.675165  | 0.074566  |

-----

4CPTe

-----

| Center | Atomic | Atomic | Coordinates (Angstroms) |   |   |
|--------|--------|--------|-------------------------|---|---|
| Number | Number | Type   | X                       | Y | Z |

-----

|   |   |   |           |          |           |
|---|---|---|-----------|----------|-----------|
| 1 | 6 | 0 | -1.393517 | 1.343575 | -0.046407 |
| 2 | 6 | 0 | -2.839181 | 1.367961 | -0.060824 |

|    |   |   |           |           |           |
|----|---|---|-----------|-----------|-----------|
| 3  | 6 | 0 | -2.076032 | 3.632059  | -0.467410 |
| 4  | 6 | 0 | -0.856399 | 2.771179  | -0.032895 |
| 5  | 1 | 0 | -0.517123 | 3.049376  | 0.977167  |
| 6  | 1 | 0 | -0.014190 | 2.925378  | -0.719257 |
| 7  | 6 | 0 | -3.330567 | 2.811457  | -0.054963 |
| 8  | 1 | 0 | -4.157380 | 2.991633  | -0.753441 |
| 9  | 1 | 0 | -3.675813 | 3.100125  | 0.950278  |
| 10 | 1 | 0 | -2.063692 | 4.633494  | -0.022654 |
| 11 | 1 | 0 | -2.064568 | 3.750378  | -1.558363 |
| 12 | 6 | 0 | -0.712764 | 0.127466  | -0.024794 |
| 13 | 6 | 0 | -3.559373 | 0.176838  | -0.058520 |
| 14 | 6 | 0 | -5.710622 | -1.229190 | -0.083006 |
| 15 | 6 | 0 | -7.161719 | -1.188131 | -0.074213 |
| 16 | 6 | 0 | -6.538273 | -3.494276 | 0.217197  |
| 17 | 6 | 0 | -5.258220 | -2.686074 | -0.163746 |
| 18 | 1 | 0 | -4.925512 | -2.935839 | -1.183499 |
| 19 | 1 | 0 | -4.434366 | -2.928022 | 0.519947  |
| 20 | 6 | 0 | -7.734576 | -2.591797 | -0.202825 |
| 21 | 1 | 0 | -8.624712 | -2.752539 | 0.415840  |
| 22 | 1 | 0 | -8.019861 | -2.788453 | -1.247175 |
| 23 | 1 | 0 | -6.563383 | -4.482465 | -0.256444 |
| 24 | 1 | 0 | -6.558851 | -3.642826 | 1.304693  |
| 25 | 6 | 0 | -4.994540 | -0.036379 | -0.035596 |
| 26 | 6 | 0 | -7.787994 | 0.026453  | 0.021934  |
| 27 | 1 | 0 | -8.857772 | 0.200295  | 0.037845  |
| 28 | 6 | 0 | 7.161539  | 1.188421  | 0.074168  |
| 29 | 6 | 0 | 5.710438  | 1.229245  | 0.083021  |
| 30 | 6 | 0 | 6.537688  | 3.494469  | -0.217172 |
| 31 | 6 | 0 | 7.734166  | 2.592181  | 0.202775  |

|    |    |   |           |           |           |
|----|----|---|-----------|-----------|-----------|
| 32 | 1  | 0 | 8.019469  | 2.788867  | 1.247115  |
| 33 | 1  | 0 | 8.624245  | 2.753083  | -0.415930 |
| 34 | 6  | 0 | 5.257788  | 2.686047  | 0.163823  |
| 35 | 1  | 0 | 4.433843  | 2.927861  | -0.519811 |
| 36 | 1  | 0 | 4.925099  | 2.935727  | 1.183603  |
| 37 | 1  | 0 | 6.562656  | 4.482654  | 0.256484  |
| 38 | 1  | 0 | 6.558185  | 3.643041  | -1.304668 |
| 39 | 6  | 0 | 7.788003  | -0.026062 | -0.022029 |
| 40 | 1  | 0 | 8.857807  | -0.199734 | -0.037985 |
| 41 | 6  | 0 | 4.994539  | 0.036331  | 0.035606  |
| 42 | 6  | 0 | 2.839210  | -1.368144 | 0.060872  |
| 43 | 6  | 0 | 1.393544  | -1.343765 | 0.046456  |
| 44 | 6  | 0 | 2.076049  | -3.632248 | 0.467466  |
| 45 | 6  | 0 | 3.330588  | -2.811645 | 0.055035  |
| 46 | 1  | 0 | 3.675855  | -3.100326 | -0.950196 |
| 47 | 1  | 0 | 4.157377  | -2.991827 | 0.753537  |
| 48 | 6  | 0 | 0.856425  | -2.771369 | 0.032939  |
| 49 | 1  | 0 | 0.014211  | -2.925568 | 0.719294  |
| 50 | 1  | 0 | 0.517158  | -3.049567 | -0.977125 |
| 51 | 1  | 0 | 2.063714  | -4.633682 | 0.022710  |
| 52 | 1  | 0 | 2.064573  | -3.750565 | 1.558419  |
| 53 | 6  | 0 | 3.559389  | -0.177005 | 0.058556  |
| 54 | 6  | 0 | 0.712780  | -0.127661 | 0.024844  |
| 55 | 52 | 0 | 6.407831  | -1.569585 | -0.105694 |
| 56 | 52 | 0 | 2.165396  | 1.421548  | 0.071626  |
| 57 | 52 | 0 | -2.165395 | -1.421729 | -0.071585 |
| 58 | 52 | 0 | -6.407585 | 1.569763  | 0.105611  |

-----

## Optimization of 5CPX

### 5CPO

| -----  |        |        |                         |           |           |  |
|--------|--------|--------|-------------------------|-----------|-----------|--|
| Center | Atomic | Atomic | Coordinates (Angstroms) |           |           |  |
| Number | Number | Type   | X                       | Y         | Z         |  |
| -----  |        |        |                         |           |           |  |
| 1      | 6      | 0      | -2.843532               | 1.992683  | 0.063177  |  |
| 2      | 6      | 0      | -4.276883               | 1.991282  | 0.062802  |  |
| 3      | 6      | 0      | -3.563466               | 4.260718  | -0.232771 |  |
| 4      | 6      | 0      | -2.300384               | 3.398737  | 0.130138  |  |
| 5      | 1      | 0      | -1.942886               | 3.628782  | 1.144437  |  |
| 6      | 1      | 0      | -1.462579               | 3.575544  | -0.552980 |  |
| 7      | 6      | 0      | -4.824456               | 3.395458  | 0.129180  |  |
| 8      | 1      | 0      | -5.662956               | 3.569052  | -0.553556 |  |
| 9      | 1      | 0      | -5.183711               | 3.623958  | 1.143013  |  |
| 10     | 1      | 0      | -3.564861               | 5.230047  | 0.279148  |  |
| 11     | 1      | 0      | -3.563378               | 4.455484  | -1.313163 |  |
| 12     | 8      | 0      | -3.559348               | -0.160273 | -0.020016 |  |
| 13     | 6      | 0      | -2.416238               | 0.680515  | 0.015118  |  |
| 14     | 6      | 0      | -4.701903               | 0.679813  | 0.014233  |  |
| 15     | 6      | 0      | -6.411926               | -1.278202 | -0.059928 |  |
| 16     | 6      | 0      | -7.853241               | -1.263795 | -0.062205 |  |
| 17     | 6      | 0      | -7.150100               | -3.536743 | 0.256215  |  |
| 18     | 6      | 0      | -5.882138               | -2.689496 | -0.120317 |  |
| 19     | 1      | 0      | -5.533218               | -2.932515 | -1.134729 |  |
| 20     | 1      | 0      | -5.042469               | -2.870160 | 0.559559  |  |
| 21     | 6      | 0      | -8.403188               | -2.670383 | -0.130595 |  |
| 22     | 1      | 0      | -9.250449               | -2.848102 | 0.541640  |  |

S55

|    |   |   |           |           |           |
|----|---|---|-----------|-----------|-----------|
| 23 | 1 | 0 | -8.739435 | -2.906399 | -1.150534 |
| 24 | 1 | 0 | -7.156845 | -4.517205 | -0.234100 |
| 25 | 1 | 0 | -7.156108 | -3.706626 | 1.340766  |
| 26 | 8 | 0 | -7.116133 | 0.875003  | 0.021957  |
| 27 | 6 | 0 | -5.979815 | 0.029787  | -0.010817 |
| 28 | 6 | 0 | -8.258735 | 0.044261  | -0.013761 |
| 29 | 1 | 0 | -9.203928 | 0.560567  | 0.009191  |
| 30 | 6 | 0 | 4.276891  | 1.991264  | 0.062757  |
| 31 | 6 | 0 | 2.843538  | 1.992671  | 0.063139  |
| 32 | 6 | 0 | 3.563464  | 4.260701  | -0.232831 |
| 33 | 6 | 0 | 4.824463  | 3.395441  | 0.129099  |
| 34 | 1 | 0 | 5.183737  | 3.623951  | 1.142927  |
| 35 | 1 | 0 | 5.662949  | 3.569024  | -0.553651 |
| 36 | 6 | 0 | 2.300390  | 3.398725  | 0.130108  |
| 37 | 1 | 0 | 1.462576  | 3.575524  | -0.553003 |
| 38 | 1 | 0 | 1.942904  | 3.628781  | 1.144406  |
| 39 | 1 | 0 | 3.564875  | 5.230034  | 0.279082  |
| 40 | 1 | 0 | 3.563341  | 4.455460  | -1.313225 |
| 41 | 8 | 0 | 3.559334  | -0.160284 | -0.020078 |
| 42 | 6 | 0 | 4.701886  | 0.679784  | 0.014204  |
| 43 | 6 | 0 | 2.416220  | 0.680513  | 0.015094  |
| 44 | 6 | 0 | 0.716197  | -1.284646 | -0.055551 |
| 45 | 6 | 0 | -0.716237 | -1.284642 | -0.055518 |
| 46 | 6 | 0 | -0.000011 | -3.553443 | 0.240467  |
| 47 | 6 | 0 | 1.261735  | -2.689736 | -0.122339 |
| 48 | 1 | 0 | 1.619911  | -2.919307 | -1.136485 |
| 49 | 1 | 0 | 2.099509  | -2.865105 | 0.561186  |
| 50 | 6 | 0 | -1.261778 | -2.689733 | -0.122258 |
| 51 | 1 | 0 | -2.099510 | -2.865098 | 0.561316  |



|    |   |   |           |           |           |
|----|---|---|-----------|-----------|-----------|
| 52 | 1 | 0 | -1.620017 | -2.919303 | -1.136386 |
| 53 | 1 | 0 | -0.000031 | -4.523089 | -0.270982 |
| 54 | 1 | 0 | 0.000032  | -3.747406 | 1.321015  |
| 55 | 8 | 0 | -0.000007 | 0.867783  | 0.026569  |
| 56 | 6 | 0 | 1.143310  | 0.027847  | -0.007885 |
| 57 | 6 | 0 | -1.143324 | 0.027862  | -0.007834 |
| 58 | 6 | 0 | 7.853257  | -1.263770 | -0.062168 |
| 59 | 6 | 0 | 6.411929  | -1.278208 | -0.059860 |
| 60 | 6 | 0 | 7.150176  | -3.536720 | 0.256314  |
| 61 | 6 | 0 | 8.403215  | -2.670352 | -0.130614 |
| 62 | 1 | 0 | 8.739339  | -2.906350 | -1.150600 |
| 63 | 1 | 0 | 9.250552  | -2.848092 | 0.541517  |
| 64 | 6 | 0 | 5.882182  | -2.689520 | -0.120207 |
| 65 | 1 | 0 | 5.042530  | -2.870211 | 0.559682  |
| 66 | 1 | 0 | 5.533258  | -2.932569 | -1.134613 |
| 67 | 1 | 0 | 7.156915  | -4.517215 | -0.233931 |
| 68 | 1 | 0 | 7.156253  | -3.706517 | 1.340879  |
| 69 | 8 | 0 | 7.116106  | 0.875018  | 0.021916  |
| 70 | 6 | 0 | 8.258726  | 0.044292  | -0.013777 |
| 71 | 6 | 0 | 5.979807  | 0.029775  | -0.010775 |
| 72 | 1 | 0 | 9.203903  | 0.560628  | 0.009153  |

# 5CPS

| Center<br>Number | Atomic<br>Number | Atomic<br>Type | Coordinates (Angstroms) |          |          |
|------------------|------------------|----------------|-------------------------|----------|----------|
|                  |                  |                | X                       | Y        | Z        |
| 1                | 6                | 0              | -3.291454               | 1.697153 | 0.040854 |

|    |   |   |            |           |           |
|----|---|---|------------|-----------|-----------|
| 2  | 6 | 0 | -4.726320  | 1.696358  | 0.040739  |
| 3  | 6 | 0 | -4.010587  | 3.975810  | -0.265493 |
| 4  | 6 | 0 | -2.761257  | 3.118012  | 0.115161  |
| 5  | 1 | 0 | -2.418587  | 3.348780  | 1.135073  |
| 6  | 1 | 0 | -1.915820  | 3.304749  | -0.556255 |
| 7  | 6 | 0 | -5.259069  | 3.116235  | 0.113633  |
| 8  | 1 | 0 | -6.104007  | 3.300946  | -0.558911 |
| 9  | 1 | 0 | -5.604115  | 3.346473  | 1.132777  |
| 10 | 1 | 0 | -4.011646  | 4.954221  | 0.228534  |
| 11 | 1 | 0 | -4.010122  | 4.150015  | -1.349221 |
| 12 | 6 | 0 | -2.697123  | 0.445598  | -0.002749 |
| 13 | 6 | 0 | -5.319086  | 0.445777  | -0.003072 |
| 14 | 6 | 0 | -7.296368  | -1.203348 | -0.054047 |
| 15 | 6 | 0 | -8.739137  | -1.195568 | -0.050257 |
| 16 | 6 | 0 | -8.042719  | -3.474447 | 0.262074  |
| 17 | 6 | 0 | -6.783708  | -2.631613 | -0.129344 |
| 18 | 1 | 0 | -6.452188  | -2.871405 | -1.151017 |
| 19 | 1 | 0 | -5.936124  | -2.828764 | 0.536499  |
| 20 | 6 | 0 | -9.281004  | -2.609818 | -0.143208 |
| 21 | 1 | 0 | -10.147554 | -2.789457 | 0.503312  |
| 22 | 1 | 0 | -9.589427  | -2.833622 | -1.175029 |
| 23 | 1 | 0 | -8.047093  | -4.462660 | -0.212346 |
| 24 | 1 | 0 | -8.049154  | -3.625889 | 1.349321  |
| 25 | 6 | 0 | -6.707146  | 0.048706  | -0.002021 |
| 26 | 6 | 0 | -9.298621  | 0.052533  | 0.017413  |
| 27 | 1 | 0 | -10.336225 | 0.352859  | 0.038683  |
| 28 | 6 | 0 | 4.726320   | 1.696358  | 0.040739  |
| 29 | 6 | 0 | 3.291454   | 1.697153  | 0.040854  |
| 30 | 6 | 0 | 4.010587   | 3.975810  | -0.265493 |

|    |   |   |           |           |           |
|----|---|---|-----------|-----------|-----------|
| 31 | 6 | 0 | 5.259069  | 3.116235  | 0.113634  |
| 32 | 1 | 0 | 5.604115  | 3.346473  | 1.132778  |
| 33 | 1 | 0 | 6.104007  | 3.300946  | -0.558911 |
| 34 | 6 | 0 | 2.761257  | 3.118012  | 0.115161  |
| 35 | 1 | 0 | 1.915820  | 3.304749  | -0.556255 |
| 36 | 1 | 0 | 2.418587  | 3.348780  | 1.135073  |
| 37 | 1 | 0 | 4.011646  | 4.954221  | 0.228534  |
| 38 | 1 | 0 | 4.010122  | 4.150015  | -1.349221 |
| 39 | 6 | 0 | 5.319086  | 0.445777  | -0.003071 |
| 40 | 6 | 0 | 2.697123  | 0.445598  | -0.002748 |
| 41 | 6 | 0 | 0.716903  | -1.200115 | -0.044844 |
| 42 | 6 | 0 | -0.716903 | -1.200115 | -0.044844 |
| 43 | 6 | 0 | 0.000000  | -3.479415 | 0.259910  |
| 44 | 6 | 0 | 1.248642  | -2.620419 | -0.119807 |
| 45 | 1 | 0 | 1.592068  | -2.850142 | -1.139681 |
| 46 | 1 | 0 | 2.093890  | -2.806582 | 0.551986  |
| 47 | 6 | 0 | -1.248642 | -2.620419 | -0.119807 |
| 48 | 1 | 0 | -2.093890 | -2.806582 | 0.551986  |
| 49 | 1 | 0 | -1.592068 | -2.850142 | -1.139681 |
| 50 | 1 | 0 | 0.000000  | -4.457807 | -0.234265 |
| 51 | 1 | 0 | -0.000000 | -3.653587 | 1.343658  |
| 52 | 6 | 0 | 1.311550  | 0.051652  | -0.001230 |
| 53 | 6 | 0 | -1.311550 | 0.051652  | -0.001231 |
| 54 | 6 | 0 | 8.739137  | -1.195568 | -0.050258 |
| 55 | 6 | 0 | 7.296368  | -1.203348 | -0.054048 |
| 56 | 6 | 0 | 8.042719  | -3.474447 | 0.262071  |
| 57 | 6 | 0 | 9.281004  | -2.609817 | -0.143209 |
| 58 | 1 | 0 | 9.589427  | -2.833620 | -1.175031 |
| 59 | 1 | 0 | 10.147554 | -2.789457 | 0.503311  |

|    |    |   |           |           |           |
|----|----|---|-----------|-----------|-----------|
| 60 | 6  | 0 | 6.783708  | -2.631613 | -0.129347 |
| 61 | 1  | 0 | 5.936123  | -2.828764 | 0.536496  |
| 62 | 1  | 0 | 6.452188  | -2.871404 | -1.151021 |
| 63 | 1  | 0 | 8.047093  | -4.462660 | -0.212350 |
| 64 | 1  | 0 | 8.049154  | -3.625890 | 1.349317  |
| 65 | 6  | 0 | 9.298620  | 0.052533  | 0.017415  |
| 66 | 6  | 0 | 6.707146  | 0.048706  | -0.002021 |
| 67 | 1  | 0 | 10.336225 | 0.352859  | 0.038686  |
| 68 | 16 | 0 | -8.025859 | 1.325819  | 0.077727  |
| 69 | 16 | 0 | -4.009071 | -0.832728 | -0.065528 |
| 70 | 16 | 0 | -0.000000 | 1.329990  | 0.061730  |
| 71 | 16 | 0 | 4.009071  | -0.832728 | -0.065527 |
| 72 | 16 | 0 | 8.025859  | 1.325819  | 0.077730  |

## 5CPSe

| Center<br>Number | Atomic<br>Number | Atomic<br>Type | Coordinates (Angstroms) |           |           |
|------------------|------------------|----------------|-------------------------|-----------|-----------|
|                  |                  |                | X                       | Y         | Z         |
| 1                | 6                | 0              | 3.401003                | -1.526840 | 0.013587  |
| 2                | 6                | 0              | 4.838939                | -1.526357 | 0.013217  |
| 3                | 6                | 0              | 4.121145                | -3.808952 | -0.311794 |
| 4                | 6                | 0              | 2.876314                | -2.953849 | 0.076150  |
| 5                | 1                | 0              | 2.532164                | -3.194176 | 1.094107  |
| 6                | 1                | 0              | 2.036145                | -3.141083 | -0.602824 |
| 7                | 6                | 0              | 5.365660                | -2.952501 | 0.074641  |
| 8                | 1                | 0              | 6.205679                | -3.137707 | -0.605079 |
| 9                | 1                | 0              | 5.711521                | -3.192447 | 1.091957  |

S60

|    |   |   |           |           |           |
|----|---|---|-----------|-----------|-----------|
| 10 | 1 | 0 | 4.122095  | -4.791898 | 0.172911  |
| 11 | 1 | 0 | 4.120696  | -3.972588 | -1.397207 |
| 12 | 6 | 0 | 2.762590  | -0.294006 | -0.015704 |
| 13 | 6 | 0 | 5.475821  | -0.294667 | -0.017517 |
| 14 | 6 | 0 | 7.514994  | 1.272737  | -0.050911 |
| 15 | 6 | 0 | 8.960540  | 1.263935  | -0.044025 |
| 16 | 6 | 0 | 8.272346  | 3.547385  | 0.265203  |
| 17 | 6 | 0 | 7.013213  | 2.708784  | -0.126856 |
| 18 | 1 | 0 | 6.682459  | 2.950751  | -1.149068 |
| 19 | 1 | 0 | 6.170772  | 2.915707  | 0.543733  |
| 20 | 6 | 0 | 9.502801  | 2.679571  | -0.146305 |
| 21 | 1 | 0 | 10.376118 | 2.858288  | 0.491228  |
| 22 | 1 | 0 | 9.801982  | 2.897827  | -1.182258 |
| 23 | 1 | 0 | 8.277651  | 4.537485  | -0.205175 |
| 24 | 1 | 0 | 8.281185  | 3.693789  | 1.353224  |
| 25 | 6 | 0 | 6.882944  | 0.039084  | -0.004023 |
| 26 | 6 | 0 | 9.558208  | 0.034424  | 0.030610  |
| 27 | 1 | 0 | 10.612646 | -0.210108 | 0.050162  |
| 28 | 6 | 0 | -4.838939 | -1.526357 | 0.013217  |
| 29 | 6 | 0 | -3.401003 | -1.526840 | 0.013586  |
| 30 | 6 | 0 | -4.121145 | -3.808952 | -0.311795 |
| 31 | 6 | 0 | -5.365660 | -2.952501 | 0.074640  |
| 32 | 1 | 0 | -5.711521 | -3.192447 | 1.091956  |
| 33 | 1 | 0 | -6.205679 | -3.137707 | -0.605080 |
| 34 | 6 | 0 | -2.876314 | -2.953849 | 0.076149  |
| 35 | 1 | 0 | -2.036145 | -3.141083 | -0.602826 |
| 36 | 1 | 0 | -2.532165 | -3.194177 | 1.094106  |
| 37 | 1 | 0 | -4.122095 | -4.791898 | 0.172909  |
| 38 | 1 | 0 | -4.120696 | -3.972587 | -1.397209 |

|    |   |   |            |           |           |
|----|---|---|------------|-----------|-----------|
| 39 | 6 | 0 | -5.475821  | -0.294667 | -0.017517 |
| 40 | 6 | 0 | -2.762590  | -0.294007 | -0.015704 |
| 41 | 6 | 0 | -0.718371  | 1.267093  | -0.029659 |
| 42 | 6 | 0 | 0.718371   | 1.267093  | -0.029659 |
| 43 | 6 | 0 | -0.000000  | 3.549832  | 0.293793  |
| 44 | 6 | 0 | -1.244435  | 2.693619  | -0.092617 |
| 45 | 1 | 0 | -1.589789  | 2.932879  | -1.110372 |
| 46 | 1 | 0 | -2.084113  | 2.880367  | 0.587101  |
| 47 | 6 | 0 | 1.244435   | 2.693619  | -0.092617 |
| 48 | 1 | 0 | 2.084112   | 2.880367  | 0.587101  |
| 49 | 1 | 0 | 1.589789   | 2.932879  | -1.110372 |
| 50 | 1 | 0 | -0.000000  | 4.532476  | -0.191593 |
| 51 | 1 | 0 | -0.000000  | 3.714085  | 1.379141  |
| 52 | 6 | 0 | -1.357357  | 0.034089  | -0.000892 |
| 53 | 6 | 0 | 1.357357   | 0.034089  | -0.000892 |
| 54 | 6 | 0 | -8.960540  | 1.263935  | -0.044025 |
| 55 | 6 | 0 | -7.514994  | 1.272737  | -0.050911 |
| 56 | 6 | 0 | -8.272346  | 3.547385  | 0.265202  |
| 57 | 6 | 0 | -9.502801  | 2.679571  | -0.146305 |
| 58 | 1 | 0 | -9.801982  | 2.897826  | -1.182259 |
| 59 | 1 | 0 | -10.376118 | 2.858288  | 0.491228  |
| 60 | 6 | 0 | -7.013213  | 2.708784  | -0.126858 |
| 61 | 1 | 0 | -6.170772  | 2.915708  | 0.543732  |
| 62 | 1 | 0 | -6.682460  | 2.950750  | -1.149069 |
| 63 | 1 | 0 | -8.277651  | 4.537485  | -0.205177 |
| 64 | 1 | 0 | -8.281184  | 3.693789  | 1.353223  |
| 65 | 6 | 0 | -9.558207  | 0.034424  | 0.030610  |
| 66 | 6 | 0 | -6.882944  | 0.039084  | -0.004023 |
| 67 | 1 | 0 | -10.612646 | -0.210108 | 0.050163  |

|    |    |   |           |           |           |
|----|----|---|-----------|-----------|-----------|
| 68 | 34 | 0 | 8.253180  | -1.360575 | 0.093880  |
| 69 | 34 | 0 | 4.120739  | 1.104557  | -0.075629 |
| 70 | 34 | 0 | 0.000000  | -1.364503 | 0.057249  |
| 71 | 34 | 0 | -4.120739 | 1.104557  | -0.075629 |
| 72 | 34 | 0 | -8.253180 | -1.360575 | 0.093881  |

## 5CPTe

| Center<br>Number | Atomic<br>Number | Atomic<br>Type | Coordinates (Angstroms) |           |           |
|------------------|------------------|----------------|-------------------------|-----------|-----------|
|                  |                  |                | X                       | Y         | Z         |
| 1                | 6                | 0              | -3.557439               | -1.351944 | 0.045227  |
| 2                | 6                | 0              | -5.002954               | -1.351197 | 0.045473  |
| 3                | 6                | 0              | -4.283574               | -3.631889 | 0.439470  |
| 4                | 6                | 0              | -3.044848               | -2.788454 | 0.025261  |
| 5                | 1                | 0              | -2.699099               | -3.063869 | -0.983395 |
| 6                | 1                | 0              | -2.213138               | -2.963144 | 0.719432  |
| 7                | 6                | 0              | -5.519565               | -2.785694 | 0.022817  |
| 8                | 1                | 0              | -6.355745               | -2.957062 | 0.712308  |
| 9                | 1                | 0              | -5.860720               | -3.059626 | -0.987919 |
| 10               | 1                | 0              | -4.284224               | -4.629119 | -0.014776 |
| 11               | 1                | 0              | -4.284956               | -3.760778 | 1.529286  |
| 12               | 6                | 0              | -2.854951               | -0.147466 | 0.039047  |
| 13               | 6                | 0              | -5.702662               | -0.147624 | 0.045472  |
| 14               | 6                | 0              | -7.829250               | 1.295301  | 0.060616  |
| 15               | 6                | 0              | -9.280599               | 1.279572  | 0.038130  |
| 16               | 6                | 0              | -8.614577               | 3.576761  | -0.229018 |
| 17               | 6                | 0              | -7.352335               | 2.743360  | 0.157084  |

|    |   |   |            |           |           |
|----|---|---|------------|-----------|-----------|
| 18 | 1 | 0 | -7.024709  | 2.979296  | 1.181782  |
| 19 | 1 | 0 | -6.518155  | 2.976219  | -0.517177 |
| 20 | 6 | 0 | -9.830273  | 2.691941  | 0.172559  |
| 21 | 1 | 0 | -10.711567 | 2.872924  | -0.453149 |
| 22 | 1 | 0 | -10.122086 | 2.885350  | 1.215701  |
| 23 | 1 | 0 | -8.626975  | 4.561414  | 0.252437  |
| 24 | 1 | 0 | -8.622400  | 3.734364  | -1.315402 |
| 25 | 6 | 0 | -7.133451  | 0.090523  | 0.010586  |
| 26 | 6 | 0 | -9.926970  | 0.076799  | -0.073215 |
| 27 | 1 | 0 | -10.999420 | -0.078164 | -0.100351 |
| 28 | 6 | 0 | 5.003088   | -1.351273 | 0.045559  |
| 29 | 6 | 0 | 3.557570   | -1.352221 | 0.045366  |
| 30 | 6 | 0 | 4.284107   | -3.632050 | 0.439684  |
| 31 | 6 | 0 | 5.519931   | -2.785683 | 0.022909  |
| 32 | 1 | 0 | 5.861051   | -3.059594 | -0.987845 |
| 33 | 1 | 0 | 6.356199   | -2.956886 | 0.712337  |
| 34 | 6 | 0 | 3.045220   | -2.788823 | 0.025529  |
| 35 | 1 | 0 | 2.213619   | -2.963628 | 0.719798  |
| 36 | 1 | 0 | 2.699424   | -3.064357 | -0.983078 |
| 37 | 1 | 0 | 4.284880   | -4.629299 | -0.014521 |
| 38 | 1 | 0 | 4.285588   | -3.760893 | 1.529505  |
| 39 | 6 | 0 | 5.702645   | -0.147619 | 0.045490  |
| 40 | 6 | 0 | 2.854940   | -0.147809 | 0.039132  |
| 41 | 6 | 0 | 0.722248   | 1.286393  | -0.006192 |
| 42 | 6 | 0 | -0.722007  | 1.286556  | -0.006237 |
| 43 | 6 | 0 | 0.000440   | 3.566013  | -0.408364 |
| 44 | 6 | 0 | 1.237380   | 2.722019  | 0.009054  |
| 45 | 1 | 0 | 1.582901   | 3.000034  | 1.017047  |
| 46 | 1 | 0 | 2.069862   | 2.892563  | -0.685215 |



|    |    |   |           |           |           |
|----|----|---|-----------|-----------|-----------|
| 47 | 6  | 0 | -1.236761 | 2.722323  | 0.008917  |
| 48 | 1  | 0 | -2.069090 | 2.893091  | -0.685475 |
| 49 | 1  | 0 | -1.582341 | 3.000449  | 1.016858  |
| 50 | 1  | 0 | 0.000541  | 4.564399  | 0.043370  |
| 51 | 1  | 0 | 0.000518  | 3.692160  | -1.498526 |
| 52 | 6  | 0 | 1.425382  | 0.081755  | 0.004747  |
| 53 | 6  | 0 | -1.425382 | 0.082041  | 0.004684  |
| 54 | 6  | 0 | 9.280559  | 1.279674  | 0.038018  |
| 55 | 6  | 0 | 7.829209  | 1.295408  | 0.060503  |
| 56 | 6  | 0 | 8.614555  | 3.576847  | -0.229294 |
| 57 | 6  | 0 | 9.830241  | 2.692049  | 0.172352  |
| 58 | 1  | 0 | 10.122049 | 2.885529  | 1.215482  |
| 59 | 1  | 0 | 10.711540 | 2.872984  | -0.453363 |
| 60 | 6  | 0 | 7.352307  | 2.743480  | 0.156857  |
| 61 | 1  | 0 | 6.518144  | 2.976304  | -0.517436 |
| 62 | 1  | 0 | 7.024668  | 2.979497  | 1.181532  |
| 63 | 1  | 0 | 8.626956  | 4.561533  | 0.252094  |
| 64 | 1  | 0 | 8.622387  | 3.734375  | -1.315689 |
| 65 | 6  | 0 | 9.926931  | 0.076894  | -0.073242 |
| 66 | 6  | 0 | 7.133417  | 0.090617  | 0.010565  |
| 67 | 1  | 0 | 10.999381 | -0.078070 | -0.100368 |
| 68 | 52 | 0 | -8.572838 | -1.489617 | -0.156227 |
| 69 | 52 | 0 | -4.281394 | 1.426336  | 0.083708  |
| 70 | 52 | 0 | -0.000157 | -1.491000 | -0.026538 |
| 71 | 52 | 0 | 4.281190  | 1.426171  | 0.083677  |
| 72 | 52 | 0 | 8.572806  | -1.489534 | -0.156131 |

-----

## 6CPO

| -----  |        |        |                         |           |           |  |
|--------|--------|--------|-------------------------|-----------|-----------|--|
| Center | Atomic | Atomic | Coordinates (Angstroms) |           |           |  |
| Number | Number | Type   | X                       | Y         | Z         |  |
| -----  |        |        |                         |           |           |  |
| 1      | 6      | 0      | -4.446081               | 2.072592  | 0.063252  |  |
| 2      | 6      | 0      | -5.873025               | 2.207441  | 0.064049  |  |
| 3      | 6      | 0      | -4.947409               | 4.398977  | -0.231026 |  |
| 4      | 6      | 0      | -3.771738               | 3.420638  | 0.130589  |  |
| 5      | 1      | 0      | -3.393486               | 3.615103  | 1.144830  |  |
| 6      | 1      | 0      | -2.921308               | 3.517516  | -0.552954 |  |
| 7      | 6      | 0      | -6.284670               | 3.657258  | 0.131461  |  |
| 8      | 1      | 0      | -7.103315               | 3.910126  | -0.550599 |  |
| 9      | 1      | 0      | -6.619874               | 3.918411  | 1.145653  |  |
| 10     | 1      | 0      | -4.856336               | 5.363785  | 0.281347  |  |
| 11     | 1      | 0      | -4.929552               | 4.593395  | -1.311338 |  |
| 12     | 8      | 0      | -5.363381               | -0.002477 | -0.020084 |  |
| 13     | 6      | 0      | -4.145447               | 0.725680  | 0.014277  |  |
| 14     | 6      | 0      | -6.420874               | 0.942294  | 0.015398  |  |
| 15     | 6      | 0      | -8.308725               | -0.844882 | -0.056278 |  |
| 16     | 6      | 0      | -9.742175               | -0.694052 | -0.057468 |  |
| 17     | 6      | 0      | -9.257213               | -3.023159 | 0.262120  |  |
| 18     | 6      | 0      | -7.915028               | -2.300060 | -0.116042 |  |
| 19     | 1      | 0      | -7.591614               | -2.575720 | -1.130565 |  |
| 20     | 1      | 0      | -7.095656               | -2.559046 | 0.563261  |  |
| 21     | 6      | 0      | -10.422911              | -2.042280 | -0.124456 |  |
| 22     | 1      | 0      | -11.282703              | -2.138511 | 0.548458  |  |
| 23     | 1      | 0      | -10.780716              | -2.246072 | -1.144010 |  |

|    |   |   |            |           |           |
|----|---|---|------------|-----------|-----------|
| 24 | 1 | 0 | -9.357188  | -3.998914 | -0.227419 |
| 25 | 1 | 0 | -9.278395  | -3.190936 | 1.346810  |
| 26 | 8 | 0 | -8.805791  | 1.365383  | 0.024966  |
| 27 | 6 | 0 | -7.754652  | 0.416364  | -0.008307 |
| 28 | 6 | 0 | -10.021937 | 0.646563  | -0.009506 |
| 29 | 1 | 0 | -10.913989 | 1.250043  | 0.013840  |
| 30 | 6 | 0 | 2.640889   | 1.392736  | 0.058519  |
| 31 | 6 | 0 | 1.215272   | 1.529736  | 0.059331  |
| 32 | 6 | 0 | 2.144877   | 3.719960  | -0.235034 |
| 33 | 6 | 0 | 3.318386   | 2.739154  | 0.126208  |
| 34 | 1 | 0 | 3.697308   | 2.932343  | 1.140405  |
| 35 | 1 | 0 | 4.168803   | 2.834253  | -0.557562 |
| 36 | 6 | 0 | 0.806467   | 2.980449  | 0.127427  |
| 37 | 1 | 0 | -0.010871  | 3.235744  | -0.555615 |
| 38 | 1 | 0 | 0.472053   | 3.242392  | 1.141842  |
| 39 | 1 | 0 | 2.237735   | 4.684532  | 0.277521  |
| 40 | 1 | 0 | 2.162988   | 3.914340  | -1.315347 |
| 41 | 8 | 0 | 1.722350   | -0.681547 | -0.024752 |
| 42 | 6 | 0 | 2.940653   | 0.045302  | 0.009774  |
| 43 | 6 | 0 | 0.664423   | 0.263853  | 0.011102  |
| 44 | 6 | 0 | -1.215303  | -1.529732 | -0.059571 |
| 45 | 6 | 0 | -2.640920  | -1.392725 | -0.058696 |
| 46 | 6 | 0 | -2.144906  | -3.719959 | 0.234777  |
| 47 | 6 | 0 | -0.806511  | -2.980446 | -0.127738 |
| 48 | 1 | 0 | -0.472158  | -3.242360 | -1.142180 |
| 49 | 1 | 0 | 0.010864   | -3.235769 | 0.555249  |
| 50 | 6 | 0 | -3.318428  | -2.739136 | -0.126376 |
| 51 | 1 | 0 | -4.168806  | -2.834244 | 0.557442  |
| 52 | 1 | 0 | -3.697409  | -2.932301 | -1.140556 |

|    |   |   |           |           |           |
|----|---|---|-----------|-----------|-----------|
| 53 | 1 | 0 | -2.237798 | -4.684516 | -0.277801 |
| 54 | 1 | 0 | -2.162958 | -3.914369 | 1.315084  |
| 55 | 8 | 0 | -1.722366 | 0.681550  | 0.024613  |
| 56 | 6 | 0 | -0.664445 | -0.263857 | -0.011283 |
| 57 | 6 | 0 | -2.940674 | -0.045291 | -0.009881 |
| 58 | 6 | 0 | 9.742199  | 0.694010  | 0.057767  |
| 59 | 6 | 0 | 8.308745  | 0.844888  | 0.056389  |
| 60 | 6 | 0 | 9.257363  | 3.023072  | -0.262286 |
| 61 | 6 | 0 | 10.422950 | 2.042229  | 0.124715  |
| 62 | 1 | 0 | 10.780454 | 2.246160  | 1.144352  |
| 63 | 1 | 0 | 11.282932 | 2.138382  | -0.547963 |
| 64 | 6 | 0 | 7.915099  | 2.300094  | 0.115847  |
| 65 | 1 | 0 | 7.095814  | 2.558994  | -0.563590 |
| 66 | 1 | 0 | 7.591606  | 2.575973  | 1.130289  |
| 67 | 1 | 0 | 9.357285  | 3.998937  | 0.227040  |
| 68 | 1 | 0 | 9.278726  | 3.190576  | -1.347014 |
| 69 | 8 | 0 | 8.805754  | -1.365410 | -0.024404 |
| 70 | 6 | 0 | 10.021919 | -0.646617 | 0.010028  |
| 71 | 6 | 0 | 7.754638  | -0.416340 | 0.008506  |
| 72 | 6 | 0 | 5.873025  | -2.207412 | -0.064012 |
| 73 | 6 | 0 | 4.446077  | -2.072574 | -0.063282 |
| 74 | 6 | 0 | 4.947415  | -4.398969 | 0.230915  |
| 75 | 6 | 0 | 6.284683  | -3.657221 | -0.131486 |
| 76 | 1 | 0 | 6.619932  | -3.918320 | -1.145678 |
| 77 | 1 | 0 | 7.103305  | -3.910115 | 0.550592  |
| 78 | 6 | 0 | 3.771749  | -3.420624 | -0.130700 |
| 79 | 1 | 0 | 2.921293  | -3.517541 | 0.552803  |
| 80 | 1 | 0 | 3.393541  | -3.615046 | -1.144966 |
| 81 | 1 | 0 | 4.856368  | -5.363756 | -0.281504 |

|    |   |   |           |           |           |
|----|---|---|-----------|-----------|-----------|
| 82 | 1 | 0 | 4.929521  | -4.593435 | 1.311218  |
| 83 | 8 | 0 | 5.363358  | 0.002492  | 0.020294  |
| 84 | 6 | 0 | 6.420856  | -0.942262 | -0.015275 |
| 85 | 6 | 0 | 4.145430  | -0.725664 | -0.014301 |
| 86 | 1 | 0 | 10.913955 | -1.250129 | -0.013132 |

## 6CPS

| Center<br>Number | Atomic<br>Number | Atomic<br>Type | Coordinates (Angstroms) |           |           |
|------------------|------------------|----------------|-------------------------|-----------|-----------|
|                  |                  |                | X                       | Y         | Z         |
| 1                | 6                | 0              | 5.204796                | 1.747285  | -0.040306 |
| 2                | 6                | 0              | 6.637282                | 1.828095  | -0.039533 |
| 3                | 6                | 0              | 5.792911                | 4.063159  | 0.266147  |
| 4                | 6                | 0              | 4.594617                | 3.135649  | -0.115075 |
| 5                | 1                | 0              | 4.239947                | 3.346441  | -1.135221 |
| 6                | 1                | 0              | 3.739548                | 3.273998  | 0.555866  |
| 7                | 6                | 0              | 7.088442                | 3.275987  | -0.112345 |
| 8                | 1                | 0              | 7.921184                | 3.508559  | 0.560555  |
| 9                | 1                | 0              | 7.420279                | 3.525407  | -1.131363 |
| 10               | 1                | 0              | 5.738559                | 5.040044  | -0.227921 |
| 11               | 1                | 0              | 5.782015                | 4.237052  | 1.349872  |
| 12               | 6                | 0              | 4.682489                | 0.463885  | 0.003107  |
| 13               | 6                | 0              | 7.300255                | 0.613216  | 0.004560  |
| 14               | 6                | 0              | 9.368248                | -0.920552 | 0.056088  |
| 15               | 6                | 0              | 10.808218               | -0.830550 | 0.052648  |
| 16               | 6                | 0              | 10.242917               | -3.145423 | -0.259824 |
| 17               | 6                | 0              | 8.937820                | -2.375731 | 0.131310  |

|    |   |   |           |           |           |
|----|---|---|-----------|-----------|-----------|
| 18 | 1 | 0 | 8.620336  | -2.634016 | 1.152935  |
| 19 | 1 | 0 | 8.102991  | -2.620931 | -0.534688 |
| 20 | 6 | 0 | 11.429791 | -2.211616 | 0.145767  |
| 21 | 1 | 0 | 12.305348 | -2.341561 | -0.500513 |
| 22 | 1 | 0 | 11.750184 | -2.417470 | 1.177676  |
| 23 | 1 | 0 | 10.303499 | -4.131781 | 0.214602  |
| 24 | 1 | 0 | 10.258242 | -3.296245 | -1.347064 |
| 25 | 6 | 0 | 8.708617  | 0.295897  | 0.003892  |
| 26 | 6 | 0 | 11.295686 | 0.447407  | -0.014927 |
| 27 | 1 | 0 | 12.314511 | 0.806334  | -0.035952 |
| 28 | 6 | 0 | -2.798906 | 1.291587  | -0.044480 |
| 29 | 6 | 0 | -1.367747 | 1.373176  | -0.043693 |
| 30 | 6 | 0 | -2.213236 | 3.608175  | 0.259493  |
| 31 | 6 | 0 | -3.410716 | 2.679255  | -0.120337 |
| 32 | 1 | 0 | -3.766232 | 2.888495  | -1.140474 |
| 33 | 1 | 0 | -4.265491 | 2.817218  | 0.551027  |
| 34 | 6 | 0 | -0.917512 | 2.821367  | -0.118897 |
| 35 | 1 | 0 | -0.084776 | 3.055656  | 0.553450  |
| 36 | 1 | 0 | -0.586878 | 3.069859  | -1.138601 |
| 37 | 1 | 0 | -2.268569 | 4.584612  | -0.235410 |
| 38 | 1 | 0 | -2.223802 | 3.782852  | 1.343098  |
| 39 | 6 | 0 | -3.321682 | 0.007931  | -0.000909 |
| 40 | 6 | 0 | -0.702522 | 0.156976  | 0.000496  |
| 41 | 6 | 0 | 1.367747  | -1.373175 | 0.043689  |
| 42 | 6 | 0 | 2.798906  | -1.291587 | 0.044477  |
| 43 | 6 | 0 | 2.213236  | -3.608174 | -0.259501 |
| 44 | 6 | 0 | 0.917512  | -2.821367 | 0.118891  |
| 45 | 1 | 0 | 0.586878  | -3.069860 | 1.138594  |
| 46 | 1 | 0 | 0.084776  | -3.055654 | -0.553457 |

|    |   |   |            |           |           |
|----|---|---|------------|-----------|-----------|
| 47 | 6 | 0 | 3.410716   | -2.679255 | 0.120332  |
| 48 | 1 | 0 | 4.265491   | -2.817216 | -0.551032 |
| 49 | 1 | 0 | 3.766231   | -2.888497 | 1.140468  |
| 50 | 1 | 0 | 2.268569   | -4.584612 | 0.235400  |
| 51 | 1 | 0 | 2.223802   | -3.782848 | -1.343107 |
| 52 | 6 | 0 | 0.702522   | -0.156975 | -0.000498 |
| 53 | 6 | 0 | 3.321682   | -0.007930 | 0.000907  |
| 54 | 6 | 0 | -10.808219 | 0.830548  | -0.052643 |
| 55 | 6 | 0 | -9.368249  | 0.920551  | -0.056088 |
| 56 | 6 | 0 | -10.242918 | 3.145424  | 0.259812  |
| 57 | 6 | 0 | -11.429792 | 2.211613  | -0.145769 |
| 58 | 1 | 0 | -11.750188 | 2.417461  | -1.177679 |
| 59 | 1 | 0 | -12.305348 | 2.341562  | 0.500512  |
| 60 | 6 | 0 | -8.937821  | 2.375729  | -0.131320 |
| 61 | 1 | 0 | -8.102991  | 2.620934  | 0.534674  |
| 62 | 1 | 0 | -8.620340  | 2.634008  | -1.152947 |
| 63 | 1 | 0 | -10.303501 | 4.131779  | -0.214619 |
| 64 | 1 | 0 | -10.258240 | 3.296252  | 1.347052  |
| 65 | 6 | 0 | -11.295686 | -0.447408 | 0.014940  |
| 66 | 6 | 0 | -8.708617  | -0.295897 | -0.003886 |
| 67 | 6 | 0 | -6.637281  | -1.828095 | 0.039534  |
| 68 | 6 | 0 | -5.204796  | -1.747284 | 0.040305  |
| 69 | 6 | 0 | -5.792911  | -4.063158 | -0.266152 |
| 70 | 6 | 0 | -7.088441  | -3.275987 | 0.112344  |
| 71 | 1 | 0 | -7.420276  | -3.525410 | 1.131361  |
| 72 | 1 | 0 | -7.921185  | -3.508558 | -0.560556 |
| 73 | 6 | 0 | -4.594616  | -3.135649 | 0.115070  |
| 74 | 1 | 0 | -3.739548  | -3.273996 | -0.555873 |
| 75 | 1 | 0 | -4.239945  | -3.346443 | 1.135215  |

|    |    |   |            |           |           |
|----|----|---|------------|-----------|-----------|
| 76 | 1  | 0 | -5.738558  | -5.040044 | 0.227913  |
| 77 | 1  | 0 | -5.782016  | -4.237048 | -1.349878 |
| 78 | 6  | 0 | -7.300255  | -0.613215 | -0.004557 |
| 79 | 6  | 0 | -4.682489  | -0.463884 | -0.003107 |
| 80 | 1  | 0 | -12.314510 | -0.806336 | 0.035970  |
| 81 | 16 | 0 | 9.952445   | 1.646105  | -0.075566 |
| 82 | 16 | 0 | 6.065066   | -0.737761 | 0.066591  |
| 83 | 16 | 0 | 1.939638   | 1.193912  | -0.063132 |
| 84 | 16 | 0 | -1.939638  | -1.193911 | 0.063132  |
| 85 | 16 | 0 | -6.065066  | 0.737761  | -0.066586 |
| 86 | 16 | 0 | -9.952444  | -1.646105 | 0.075583  |

# 6CPSe

| Center<br>Number | Atomic<br>Number | Atomic<br>Type | Coordinates (Angstroms) |          |           |
|------------------|------------------|----------------|-------------------------|----------|-----------|
|                  |                  |                | X                       | Y        | Z         |
| 1                | 6                | 0              | 5.418822                | 1.552663 | -0.012633 |
| 2                | 6                | 0              | 6.856098                | 1.593252 | -0.010032 |
| 3                | 6                | 0              | 6.072866                | 3.854503 | 0.312864  |
| 4                | 6                | 0              | 4.853638                | 2.964033 | -0.076772 |
| 5                | 1                | 0              | 4.504561                | 3.193977 | -1.095473 |
| 6                | 1                | 0              | 4.007260                | 3.127436 | 0.600642  |
| 7                | 6                | 0              | 7.341935                | 3.033850 | -0.071356 |
| 8                | 1                | 0              | 8.175330                | 3.243319 | 0.609469  |
| 9                | 1                | 0              | 7.682247                | 3.283168 | -1.088295 |
| 10               | 1                | 0              | 6.046500                | 4.836956 | -0.172131 |
| 11               | 1                | 0              | 6.066026                | 4.018310 | 1.398234  |



|    |   |   |           |           |           |
|----|---|---|-----------|-----------|-----------|
| 12 | 6 | 0 | 4.815756  | 0.302027  | 0.016329  |
| 13 | 6 | 0 | 7.527916  | 0.380231  | 0.022279  |
| 14 | 6 | 0 | 9.610997  | -1.128160 | 0.059452  |
| 15 | 6 | 0 | 11.055701 | -1.078041 | 0.054399  |
| 16 | 6 | 0 | 10.433479 | -3.380385 | -0.254441 |
| 17 | 6 | 0 | 9.150420  | -2.577939 | 0.135663  |
| 18 | 1 | 0 | 8.825611  | -2.828699 | 1.157671  |
| 19 | 1 | 0 | 8.315007  | -2.809327 | -0.535714 |
| 20 | 6 | 0 | 11.638089 | -2.477537 | 0.158150  |
| 21 | 1 | 0 | 12.516977 | -2.631528 | -0.478179 |
| 22 | 1 | 0 | 11.942070 | -2.686630 | 1.194595  |
| 23 | 1 | 0 | 10.466508 | -4.369703 | 0.216446  |
| 24 | 1 | 0 | 10.447855 | -3.526990 | -1.342375 |
| 25 | 6 | 0 | 8.943985  | 0.086918  | 0.010958  |
| 26 | 6 | 0 | 11.618074 | 0.168011  | -0.020290 |
| 27 | 1 | 0 | 12.665119 | 0.442566  | -0.038679 |
| 28 | 6 | 0 | -2.816891 | 1.316759  | -0.028074 |
| 29 | 6 | 0 | -1.381092 | 1.357967  | -0.025265 |
| 30 | 6 | 0 | -2.165129 | 3.619651  | 0.293540  |
| 31 | 6 | 0 | -3.383721 | 2.727459  | -0.093781 |
| 32 | 1 | 0 | -3.734134 | 2.955284  | -1.112428 |
| 33 | 1 | 0 | -4.229561 | 2.890798  | 0.584316  |
| 34 | 6 | 0 | -0.895897 | 2.798866  | -0.088997 |
| 35 | 1 | 0 | -0.063478 | 3.010603  | 0.592291  |
| 36 | 1 | 0 | -0.555251 | 3.046568  | -1.106353 |
| 37 | 1 | 0 | -2.192338 | 4.601076  | -0.193511 |
| 38 | 1 | 0 | -2.171963 | 3.785637  | 1.378605  |
| 39 | 6 | 0 | -3.420629 | 0.065876  | 0.000698  |
| 40 | 6 | 0 | -0.706703 | 0.143483  | 0.005962  |

|    |   |   |            |           |           |
|----|---|---|------------|-----------|-----------|
| 41 | 6 | 0 | 1.381092   | -1.357965 | 0.025256  |
| 42 | 6 | 0 | 2.816891   | -1.316757 | 0.028066  |
| 43 | 6 | 0 | 2.165129   | -3.619649 | -0.293554 |
| 44 | 6 | 0 | 0.895896   | -2.798864 | 0.088985  |
| 45 | 1 | 0 | 0.555251   | -3.046568 | 1.106341  |
| 46 | 1 | 0 | 0.063477   | -3.010600 | -0.592303 |
| 47 | 6 | 0 | 3.383721   | -2.727458 | 0.093771  |
| 48 | 1 | 0 | 4.229561   | -2.890796 | -0.584326 |
| 49 | 1 | 0 | 3.734132   | -2.955285 | 1.112417  |
| 50 | 1 | 0 | 2.192337   | -4.601075 | 0.193495  |
| 51 | 1 | 0 | 2.171963   | -3.785632 | -1.378619 |
| 52 | 6 | 0 | 0.706703   | -0.143481 | -0.005970 |
| 53 | 6 | 0 | 3.420629   | -0.065875 | -0.000705 |
| 54 | 6 | 0 | -11.055702 | 1.078038  | -0.054387 |
| 55 | 6 | 0 | -9.610998  | 1.128158  | -0.059447 |
| 56 | 6 | 0 | -10.433480 | 3.380384  | 0.254440  |
| 57 | 6 | 0 | -11.638091 | 2.477533  | -0.158141 |
| 58 | 1 | 0 | -11.942077 | 2.686622  | -1.194586 |
| 59 | 1 | 0 | -12.516977 | 2.631526  | 0.478191  |
| 60 | 6 | 0 | -9.150423  | 2.577937  | -0.135666 |
| 61 | 1 | 0 | -8.315008  | 2.809329  | 0.535707  |
| 62 | 1 | 0 | -8.825618  | 2.828693  | -1.157677 |
| 63 | 1 | 0 | -10.466513 | 4.369700  | -0.216451 |
| 64 | 1 | 0 | -10.447851 | 3.526994  | 1.342373  |
| 65 | 6 | 0 | -11.618074 | -0.168014 | 0.020309  |
| 66 | 6 | 0 | -8.943985  | -0.086919 | -0.010952 |
| 67 | 6 | 0 | -6.856097  | -1.593252 | 0.010029  |
| 68 | 6 | 0 | -5.418821  | -1.552663 | 0.012626  |
| 69 | 6 | 0 | -6.072865  | -3.854502 | -0.312877 |

|    |    |   |            |           |           |
|----|----|---|------------|-----------|-----------|
| 70 | 6  | 0 | -7.341934  | -3.033850 | 0.071349  |
| 71 | 1  | 0 | -7.682241  | -3.283172 | 1.088289  |
| 72 | 1  | 0 | -8.175331  | -3.243318 | -0.609473 |
| 73 | 6  | 0 | -4.853637  | -2.964032 | 0.076760  |
| 74 | 1  | 0 | -4.007260  | -3.127433 | -0.600656 |
| 75 | 1  | 0 | -4.504558  | -3.193980 | 1.095459  |
| 76 | 1  | 0 | -6.046498  | -4.836956 | 0.172114  |
| 77 | 1  | 0 | -6.066027  | -4.018304 | -1.398248 |
| 78 | 6  | 0 | -7.527916  | -0.380232 | -0.022278 |
| 79 | 6  | 0 | -4.815756  | -0.302026 | -0.016334 |
| 80 | 1  | 0 | -12.665119 | -0.442570 | 0.038703  |
| 81 | 34 | 0 | 10.273777  | 1.525134  | -0.086064 |
| 82 | 34 | 0 | 6.213308   | -1.057131 | 0.079092  |
| 83 | 34 | 0 | 2.023935   | 1.293342  | -0.062810 |
| 84 | 34 | 0 | -2.023935  | -1.293340 | 0.062804  |
| 85 | 34 | 0 | -6.213309  | 1.057131  | -0.079090 |
| 86 | 34 | 0 | -10.273776 | -1.525136 | 0.086082  |

# 6CPTe

| Center<br>Number | Atomic<br>Number | Atomic<br>Type | Coordinates (Angstroms) |           |           |
|------------------|------------------|----------------|-------------------------|-----------|-----------|
|                  |                  |                | X                       | Y         | Z         |
| 1                | 6                | 0              | -5.688340               | -1.359313 | 0.042726  |
| 2                | 6                | 0              | -7.133716               | -1.368471 | 0.048634  |
| 3                | 6                | 0              | -6.397217               | -3.645754 | 0.430414  |
| 4                | 6                | 0              | -5.165975               | -2.792157 | 0.014767  |
| 5                | 1                | 0              | -4.822478               | -3.061057 | -0.996436 |

|    |   |   |            |           |           |
|----|---|---|------------|-----------|-----------|
| 6  | 1 | 0 | -4.330277  | -2.963965 | 0.704844  |
| 7  | 6 | 0 | -7.640619  | -2.806360 | 0.022148  |
| 8  | 1 | 0 | -8.472835  | -2.986272 | 0.714245  |
| 9  | 1 | 0 | -7.983931  | -3.078474 | -0.988348 |
| 10 | 1 | 0 | -6.392861  | -4.641108 | -0.027902 |
| 11 | 1 | 0 | -6.393355  | -3.779047 | 1.519698  |
| 12 | 6 | 0 | -4.994030  | -0.149911 | 0.038685  |
| 13 | 6 | 0 | -7.841721  | -0.169692 | 0.056173  |
| 14 | 6 | 0 | -9.978047  | 1.258593  | 0.084884  |
| 15 | 6 | 0 | -11.429307 | 1.232993  | 0.067766  |
| 16 | 6 | 0 | -10.780058 | 3.535684  | -0.193102 |
| 17 | 6 | 0 | -9.510704  | 2.709512  | 0.185125  |
| 18 | 1 | 0 | -9.180875  | 2.943796  | 1.209492  |
| 19 | 1 | 0 | -8.680670  | 2.950644  | -0.491348 |
| 20 | 6 | 0 | -11.988144 | 2.641038  | 0.209604  |
| 21 | 1 | 0 | -12.872973 | 2.818394  | -0.412131 |
| 22 | 1 | 0 | -12.277350 | 2.828457  | 1.254567  |
| 23 | 1 | 0 | -10.797398 | 4.518407  | 0.292114  |
| 24 | 1 | 0 | -10.793002 | 3.697299  | -1.278850 |
| 25 | 6 | 0 | -9.274177  | 0.058771  | 0.027651  |
| 26 | 6 | 0 | -12.067857 | 0.026255  | -0.045666 |
| 27 | 1 | 0 | -13.139318 | -0.135939 | -0.069364 |
| 28 | 6 | 0 | 2.871270   | -1.298998 | 0.008781  |
| 29 | 6 | 0 | 1.427497   | -1.309067 | 0.015473  |
| 30 | 6 | 0 | 2.167168   | -3.586225 | 0.399691  |
| 31 | 6 | 0 | 3.396396   | -2.730844 | -0.017253 |
| 32 | 1 | 0 | 3.740076   | -3.000061 | -1.028241 |
| 33 | 1 | 0 | 4.232678   | -2.899780 | 0.672827  |
| 34 | 6 | 0 | 0.922210   | -2.748104 | -0.005501 |

|    |   |   |           |           |           |
|----|---|---|-----------|-----------|-----------|
| 35 | 1 | 0 | 0.095238  | -2.928814 | 0.692724  |
| 36 | 1 | 0 | 0.572350  | -3.022222 | -1.013088 |
| 37 | 1 | 0 | 2.171926  | -4.581244 | -0.059345 |
| 38 | 1 | 0 | 2.173261  | -3.720368 | 1.488885  |
| 39 | 6 | 0 | 3.566469  | -0.089402 | 0.000802  |
| 40 | 6 | 0 | 0.715291  | -0.109047 | 0.013474  |
| 41 | 6 | 0 | -1.427698 | 1.309607  | -0.015623 |
| 42 | 6 | 0 | -2.871472 | 1.299299  | -0.008869 |
| 43 | 6 | 0 | -2.167823 | 3.586639  | -0.399848 |
| 44 | 6 | 0 | -0.922687 | 2.748746  | 0.005265  |
| 45 | 1 | 0 | -0.572787 | 3.022964  | 1.012812  |
| 46 | 1 | 0 | -0.095828 | 2.929611  | -0.693050 |
| 47 | 6 | 0 | -3.396863 | 2.731045  | 0.017191  |
| 48 | 1 | 0 | -4.233229 | 2.899817  | -0.672827 |
| 49 | 1 | 0 | -3.740519 | 3.000208  | 1.028202  |
| 50 | 1 | 0 | -2.172730 | 4.581663  | 0.059177  |
| 51 | 1 | 0 | -2.174020 | 3.720767  | -1.489043 |
| 52 | 6 | 0 | -0.715313 | 0.109677  | -0.013612 |
| 53 | 6 | 0 | -3.566482 | 0.089599  | -0.000848 |
| 54 | 6 | 0 | 11.429304 | -1.233316 | -0.067723 |
| 55 | 6 | 0 | 9.978042  | -1.258898 | -0.084844 |
| 56 | 6 | 0 | 10.780037 | -3.536006 | 0.193089  |
| 57 | 6 | 0 | 11.988128 | -2.641362 | -0.209598 |
| 58 | 1 | 0 | 12.277330 | -2.828758 | -1.254566 |
| 59 | 1 | 0 | 12.872957 | -2.818741 | 0.412130  |
| 60 | 6 | 0 | 9.510690  | -2.709814 | -0.185112 |
| 61 | 1 | 0 | 8.680663  | -2.950958 | 0.491364  |
| 62 | 1 | 0 | 9.180851  | -2.944075 | -1.209482 |
| 63 | 1 | 0 | 10.797367 | -4.518717 | -0.292151 |

|    |    |   |            |           |           |
|----|----|---|------------|-----------|-----------|
| 64 | 1  | 0 | 10.792984  | -3.697648 | 1.278834  |
| 65 | 6  | 0 | 12.067870  | -0.026589 | 0.045738  |
| 66 | 6  | 0 | 9.274191   | -0.059063 | -0.027589 |
| 67 | 6  | 0 | 7.133842   | 1.368307  | -0.048553 |
| 68 | 6  | 0 | 5.688466   | 1.359275  | -0.042673 |
| 69 | 6  | 0 | 6.397553   | 3.645665  | -0.430270 |
| 70 | 6  | 0 | 7.640873   | 2.806149  | -0.022001 |
| 71 | 1  | 0 | 7.984182   | 3.078195  | 0.988514  |
| 72 | 1  | 0 | 8.473129   | 2.986007  | -0.714067 |
| 73 | 6  | 0 | 5.166225   | 2.792162  | -0.014675 |
| 74 | 1  | 0 | 4.330551   | 2.964061  | -0.704758 |
| 75 | 1  | 0 | 4.822734   | 3.061056  | 0.996531  |
| 76 | 1  | 0 | 6.393274   | 4.641005  | 0.028077  |
| 77 | 1  | 0 | 6.393726   | 3.778992  | -1.519550 |
| 78 | 6  | 0 | 7.841746   | 0.169473  | -0.056122 |
| 79 | 6  | 0 | 4.994049   | 0.149937  | -0.038686 |
| 80 | 1  | 0 | 13.139333  | 0.135590  | 0.069442  |
| 81 | 52 | 0 | -10.703399 | -1.530499 | -0.139676 |
| 82 | 52 | 0 | -6.431174  | 1.413794  | 0.095396  |
| 83 | 52 | 0 | -2.130265  | -1.472991 | -0.046171 |
| 84 | 52 | 0 | 2.130485   | 1.473404  | 0.046112  |
| 85 | 52 | 0 | 6.431060   | -1.413889 | -0.095425 |
| 86 | 52 | 0 | 10.703435  | 1.530183  | 0.139775  |

---

## Optimization of PCPXs

### PCPO

---

| Center | Atomic | Atomic | Coordinates (Angstroms) |           |           |
|--------|--------|--------|-------------------------|-----------|-----------|
| Number | Number | Type   | X                       | Y         | Z         |
| -----  |        |        |                         |           |           |
| 1      | 6      | 0      | 2.528481                | 1.588473  | -0.003457 |
| 2      | 6      | 0      | 1.096825                | 1.617805  | -0.006846 |
| 3      | 6      | 0      | 1.859879                | 3.856877  | -0.396716 |
| 4      | 6      | 0      | 3.102885                | 2.983610  | 0.005190  |
| 5      | 1      | 0      | 3.464265                | 3.248395  | 1.009577  |
| 6      | 1      | 0      | 3.945196                | 3.112587  | -0.683065 |
| 7      | 6      | 0      | 0.580199                | 3.035283  | -0.000684 |
| 8      | 1      | 0      | -0.252886               | 3.198714  | -0.692797 |
| 9      | 1      | 0      | 0.225504                | 3.314672  | 1.002109  |
| 10     | 1      | 0      | 1.879063                | 4.846950  | 0.073447  |
| 11     | 1      | 0      | 1.865411                | 4.005026  | -1.484457 |
| 12     | 8      | 0      | 1.768562                | -0.551102 | 0.003128  |
| 13     | 6      | 0      | 2.928964                | 0.266285  | 0.005170  |
| 14     | 6      | 0      | 0.642687                | 0.312882  | -0.000615 |
| 15     | 6      | 0      | -1.096820               | -1.617802 | 0.007090  |
| 16     | 6      | 0      | -2.528476               | -1.588470 | 0.003683  |
| 17     | 6      | 0      | -1.859879               | -3.856919 | 0.396691  |
| 18     | 6      | 0      | -0.580193               | -3.035279 | 0.000775  |
| 19     | 1      | 0      | -0.225479               | -3.314553 | -1.002044 |
| 20     | 1      | 0      | 0.252878                | -3.198788 | 0.692885  |
| 21     | 6      | 0      | -3.102880               | -2.983606 | -0.005130 |
| 22     | 1      | 0      | -3.945198               | -3.112661 | 0.683102  |
| 23     | 1      | 0      | -3.464250               | -3.248277 | -1.009551 |
| 24     | 1      | 0      | -1.879056               | -4.846937 | -0.073587 |
| 25     | 1      | 0      | -1.865426               | -4.005194 | 1.484415  |
| 26     | 8      | 0      | -1.768558               | 0.551106  | -0.002669 |

|    |    |   |           |           |           |
|----|----|---|-----------|-----------|-----------|
| 27 | 6  | 0 | -0.642683 | -0.312878 | 0.000989  |
| 28 | 6  | 0 | -2.928960 | -0.266281 | -0.004814 |
| 29 | -2 | 0 | 7.116408  | -0.145820 | 0.016879  |

-----

## PCPS

-----

| Center | Atomic | Atomic | Coordinates (Angstroms) |   |   |
|--------|--------|--------|-------------------------|---|---|
| Number | Number | Type   | X                       | Y | Z |

-----

|    |   |   |           |           |           |
|----|---|---|-----------|-----------|-----------|
| 1  | 6 | 0 | 2.712482  | 1.405793  | -0.006001 |
| 2  | 6 | 0 | 1.294711  | 1.432413  | -0.014993 |
| 3  | 6 | 0 | 2.048500  | 3.670920  | -0.409299 |
| 4  | 6 | 0 | 3.273198  | 2.808293  | 0.002892  |
| 5  | 1 | 0 | 3.630774  | 3.074976  | 1.007123  |
| 6  | 1 | 0 | 4.118328  | 2.946898  | -0.678203 |
| 7  | 6 | 0 | 0.787121  | 2.855051  | -0.012838 |
| 8  | 1 | 0 | -0.043492 | 3.025284  | -0.704536 |
| 9  | 1 | 0 | 0.427149  | 3.135281  | 0.986845  |
| 10 | 1 | 0 | 2.064361  | 4.666831  | 0.041976  |
| 11 | 1 | 0 | 2.057898  | 3.805576  | -1.496114 |
| 12 | 6 | 0 | 3.263810  | 0.137668  | 0.013138  |
| 13 | 6 | 0 | 0.695905  | 0.185925  | -0.003135 |
| 14 | 6 | 0 | -1.294711 | -1.432413 | 0.014989  |
| 15 | 6 | 0 | -2.712482 | -1.405793 | 0.005997  |

S80



|    |    |   |           |           |           |
|----|----|---|-----------|-----------|-----------|
| 16 | 6  | 0 | -2.048500 | -3.670919 | 0.409302  |
| 17 | 6  | 0 | -0.787121 | -2.855051 | 0.012838  |
| 18 | 1  | 0 | -0.427150 | -3.135284 | -0.986844 |
| 19 | 1  | 0 | 0.043493  | -3.025282 | 0.704536  |
| 20 | 6  | 0 | -3.273198 | -2.808294 | -0.002892 |
| 21 | 1  | 0 | -4.118328 | -2.946897 | 0.678203  |
| 22 | 1  | 0 | -3.630774 | -3.074979 | -1.007122 |
| 23 | 1  | 0 | -2.064361 | -4.666832 | -0.041969 |
| 24 | 1  | 0 | -2.057897 | -3.805571 | 1.496117  |
| 25 | 6  | 0 | -0.695906 | -0.185925 | 0.003128  |
| 26 | 6  | 0 | -3.263811 | -0.137668 | -0.013145 |
| 27 | 16 | 0 | 1.957034  | -1.054688 | 0.000029  |
| 28 | 16 | 0 | -1.957034 | 1.054687  | -0.000040 |
| 29 | -2 | 0 | 7.904395  | -0.148487 | 0.050196  |

# PCPSe

| Center<br>Number | Atomic<br>Number | Atomic<br>Type | Coordinates (Angstroms) |          |           |
|------------------|------------------|----------------|-------------------------|----------|-----------|
|                  |                  |                | X                       | Y        | Z         |
| 1                | 6                | 0              | 2.795693                | 1.360791 | -0.008175 |
| 2                | 6                | 0              | 1.360229                | 1.379364 | -0.020598 |
| 3                | 6                | 0              | 2.110985                | 3.639227 | -0.421695 |
| 4                | 6                | 0              | 3.340703                | 2.781520 | 0.006064  |
| 5                | 1                | 0              | 3.681715                | 3.053732 | 1.017032  |
| 6                | 1                | 0              | 4.187797                | 2.931753 | -0.673464 |
| 7                | 6                | 0              | 0.852235                | 2.813801 | -0.015346 |
| 8                | 1                | 0              | 0.021096                | 2.986106 | -0.709146 |

|    |    |   |           |           |           |
|----|----|---|-----------|-----------|-----------|
| 9  | 1  | 0 | 0.501248  | 3.094836  | 0.989789  |
| 10 | 1  | 0 | 2.120114  | 4.638710  | 0.027798  |
| 11 | 1  | 0 | 2.122058  | 3.763956  | -1.512247 |
| 12 | 6  | 0 | 3.419521  | 0.118808  | 0.015294  |
| 13 | 6  | 0 | 0.704150  | 0.153855  | -0.007809 |
| 14 | 6  | 0 | -1.360226 | -1.379364 | 0.020595  |
| 15 | 6  | 0 | -2.795691 | -1.360789 | 0.008171  |
| 16 | 6  | 0 | -2.110986 | -3.639226 | 0.421696  |
| 17 | 6  | 0 | -0.852235 | -2.813802 | 0.015346  |
| 18 | 1  | 0 | -0.501248 | -3.094839 | -0.989788 |
| 19 | 1  | 0 | -0.021096 | -2.986107 | 0.709147  |
| 20 | 6  | 0 | -3.340703 | -2.781518 | -0.006066 |
| 21 | 1  | 0 | -4.187798 | -2.931748 | 0.673460  |
| 22 | 1  | 0 | -3.681714 | -3.053730 | -1.017034 |
| 23 | 1  | 0 | -2.120116 | -4.638709 | -0.027796 |
| 24 | 1  | 0 | -2.122060 | -3.763953 | 1.512248  |
| 25 | 6  | 0 | -0.704147 | -0.153856 | 0.007804  |
| 26 | 6  | 0 | -3.419517 | -0.118806 | -0.015300 |
| 27 | 34 | 0 | 2.043766  | -1.263303 | -0.001254 |
| 28 | 34 | 0 | -2.043761 | 1.263304  | 0.001246  |
| 29 | -2 | 0 | 8.238407  | -0.106458 | 0.070031  |

PCPTe

| Center<br>Number | Atomic<br>Number | Atomic<br>Type | Coordinates (Angstroms) |          |           |
|------------------|------------------|----------------|-------------------------|----------|-----------|
|                  |                  |                | X                       | Y        | Z         |
| 1                | 6                | 0              | 2.845701                | 1.352797 | -0.008195 |

S82

|    |    |   |           |           |           |
|----|----|---|-----------|-----------|-----------|
| 2  | 6  | 0 | 1.402959  | 1.335889  | -0.021191 |
| 3  | 6  | 0 | 2.101617  | 3.623345  | -0.420705 |
| 4  | 6  | 0 | 3.344562  | 2.794190  | 0.007866  |
| 5  | 1  | 0 | 3.679601  | 3.077563  | 1.017958  |
| 6  | 1  | 0 | 4.180345  | 2.972620  | -0.680410 |
| 7  | 6  | 0 | 0.870782  | 2.765351  | -0.014184 |
| 8  | 1  | 0 | 0.043513  | 2.924728  | -0.717285 |
| 9  | 1  | 0 | 0.511369  | 3.040880  | 0.989680  |
| 10 | 1  | 0 | 2.086057  | 4.621708  | 0.030753  |
| 11 | 1  | 0 | 2.109925  | 3.749462  | -1.510828 |
| 12 | 6  | 0 | 3.564115  | 0.155945  | 0.014325  |
| 13 | 6  | 0 | 0.712740  | 0.122505  | -0.011445 |
| 14 | 6  | 0 | -1.403130 | -1.335782 | 0.021137  |
| 15 | 6  | 0 | -2.845871 | -1.352906 | 0.008243  |
| 16 | 6  | 0 | -2.101341 | -3.623340 | 0.420710  |
| 17 | 6  | 0 | -0.870697 | -2.765144 | 0.014056  |
| 18 | 1  | 0 | -0.511358 | -3.040600 | -0.989855 |
| 19 | 1  | 0 | -0.043300 | -2.924362 | 0.717046  |
| 20 | 6  | 0 | -3.344473 | -2.794394 | -0.007737 |
| 21 | 1  | 0 | -4.180128 | -2.972978 | 0.680649  |
| 22 | 1  | 0 | -3.679581 | -3.077845 | -1.017785 |
| 23 | 1  | 0 | -2.085658 | -4.621702 | -0.030744 |
| 24 | 1  | 0 | -2.109512 | -3.749452 | 1.510835  |
| 25 | 6  | 0 | -0.713068 | -0.122323 | 0.011364  |
| 26 | 6  | 0 | -3.564440 | -0.156133 | -0.014272 |
| 27 | 52 | 0 | -2.157447 | 1.433734  | 0.023426  |
| 28 | 52 | 0 | 2.156911  | -1.433740 | -0.023406 |
| 29 | -2 | 0 | 8.559000  | 0.101232  | 0.077392  |

## Optimization of CHX

### CHO

| Center<br>Number | Atomic<br>Number | Atomic<br>Type | Coordinates (Angstroms) |           |           |
|------------------|------------------|----------------|-------------------------|-----------|-----------|
|                  |                  |                | X                       | Y         | Z         |
| 1                | 6                | 0              | -1.702328               | 1.122621  | 0.042580  |
| 2                | 6                | 0              | -0.386461               | 0.727584  | 0.028734  |
| 3                | 6                | 0              | -0.386463               | -0.727574 | -0.028948 |
| 4                | 6                | 0              | -1.702326               | -1.122625 | -0.042567 |
| 5                | 6                | 0              | 2.104040                | 0.694181  | -0.342293 |
| 6                | 1                | 0              | 2.085537                | 0.556169  | -1.433998 |
| 7                | 1                | 0              | 3.030181                | 1.232962  | -0.100137 |
| 8                | 6                | 0              | 2.103890                | -0.694248 | 0.342756  |
| 9                | 1                | 0              | 2.084883                | -0.556323 | 1.434459  |
| 10               | 1                | 0              | 3.030140                | -1.233005 | 0.100961  |
| 11               | 6                | 0              | 0.883863                | 1.545205  | 0.098032  |
| 12               | 1                | 0              | 0.805262                | 2.448221  | -0.522145 |
| 13               | 1                | 0              | 1.047213                | 1.887924  | 1.131466  |
| 14               | 6                | 0              | 0.883877                | -1.545159 | -0.098231 |
| 15               | 1                | 0              | 0.805096                | -2.448481 | 0.521469  |
| 16               | 1                | 0              | 1.047576                | -1.887354 | -1.131789 |
| 17               | 8                | 0              | -2.539939               | -0.000000 | -0.000108 |
| 18               | 1                | 0              | -2.202454               | -2.076691 | -0.080911 |
| 19               | 1                | 0              | -2.202471               | 2.076671  | 0.081116  |

## CHS

| -----  |        |        |                         |           |           |  |
|--------|--------|--------|-------------------------|-----------|-----------|--|
| Center | Atomic | Atomic | Coordinates (Angstroms) |           |           |  |
| Number | Number | Type   | X                       | Y         | Z         |  |
| -----  |        |        |                         |           |           |  |
| 1      | 6      | 0      | 1.319381                | 1.262148  | -0.033676 |  |
| 2      | 6      | 0      | 0.051852                | 0.728098  | -0.023665 |  |
| 3      | 6      | 0      | 0.051853                | -0.728102 | 0.023593  |  |
| 4      | 6      | 0      | 1.319382                | -1.262150 | 0.033611  |  |
| 5      | 6      | 0      | -2.461200               | 0.692364  | 0.343289  |  |
| 6      | 1      | 0      | -2.444330               | 0.554769  | 1.435025  |  |
| 7      | 1      | 0      | -3.383915               | 1.237002  | 0.100444  |  |
| 8      | 6      | 0      | -2.461164               | -0.692378 | -0.343439 |  |
| 9      | 1      | 0      | -2.444193               | -0.554798 | -1.435176 |  |
| 10     | 1      | 0      | -3.383893               | -1.237024 | -0.100669 |  |
| 11     | 6      | 0      | -1.238206               | 1.530220  | -0.102407 |  |
| 12     | 1      | 0      | -1.158943               | 2.444379  | 0.500884  |  |
| 13     | 1      | 0      | -1.397375               | 1.854469  | -1.142692 |  |
| 14     | 6      | 0      | -1.238204               | -1.530209 | 0.102396  |  |
| 15     | 1      | 0      | -1.158917               | -2.444433 | -0.500791 |  |
| 16     | 1      | 0      | -1.397427               | -1.854343 | 1.142712  |  |
| 17     | 1      | 0      | 1.613388                | -2.301762 | 0.068329  |  |
| 18     | 1      | 0      | 1.613394                | 2.301761  | -0.068299 |  |
| 19     | 16     | 0      | 2.592503                | 0.000002  | 0.000126  |  |

## CHSe

| -----  |        |        |                         |  |  |     |
|--------|--------|--------|-------------------------|--|--|-----|
| Center | Atomic | Atomic | Coordinates (Angstroms) |  |  |     |
|        |        |        |                         |  |  | S85 |

| Number | Number | Type | X         | Y         | Z         |
|--------|--------|------|-----------|-----------|-----------|
| -----  |        |      |           |           |           |
| 1      | 6      | 0    | -0.010347 | 1.299506  | 0.761903  |
| 2      | 6      | 0    | -0.000000 | 0.729852  | -0.489468 |
| 3      | 6      | 0    | -0.000000 | -0.729852 | -0.489468 |
| 4      | 6      | 0    | 0.010347  | -1.299506 | 0.761903  |
| 5      | 6      | 0    | -0.362224 | 0.682153  | -3.010139 |
| 6      | 1      | 0    | -1.449815 | 0.514483  | -2.993687 |
| 7      | 1      | 0    | -0.134146 | 1.234966  | -3.931864 |
| 8      | 6      | 0    | 0.362224  | -0.682153 | -3.010139 |
| 9      | 1      | 0    | 1.449815  | -0.514483 | -2.993687 |
| 10     | 1      | 0    | 0.134146  | -1.234966 | -3.931864 |
| 11     | 6      | 0    | 0.061772  | 1.528192  | -1.786183 |
| 12     | 1      | 0    | -0.560420 | 2.429731  | -1.708706 |
| 13     | 1      | 0    | 1.095598  | 1.873852  | -1.943782 |
| 14     | 6      | 0    | -0.061772 | -1.528192 | -1.786183 |
| 15     | 1      | 0    | 0.560420  | -2.429731 | -1.708706 |
| 16     | 1      | 0    | -1.095598 | -1.873852 | -1.943782 |
| 17     | 1      | 0    | 0.008520  | -2.355065 | 1.004418  |
| 18     | 1      | 0    | -0.008520 | 2.355065  | 1.004418  |
| 19     | 34     | 0    | -0.000000 | 0.000000  | 2.159820  |

# CHTe

| Center | Atomic | Atomic | Coordinates (Angstroms) |          |          |
|--------|--------|--------|-------------------------|----------|----------|
| Number | Number | Type   | X                       | Y        | Z        |
| -----  |        |        |                         |          |          |
| 1      | 6      | 0      | -0.000000               | 1.349168 | 0.318926 |

|    |    |   |           |           |           |
|----|----|---|-----------|-----------|-----------|
| 2  | 6  | 0 | 0.007616  | 0.732472  | -0.911311 |
| 3  | 6  | 0 | -0.007616 | -0.732472 | -0.911311 |
| 4  | 6  | 0 | -0.000000 | -1.349168 | 0.318926  |
| 5  | 6  | 0 | -0.351004 | 0.687358  | -3.443007 |
| 6  | 1  | 0 | -1.441266 | 0.537940  | -3.427307 |
| 7  | 1  | 0 | -0.113254 | 1.239097  | -4.363037 |
| 8  | 6  | 0 | 0.351004  | -0.687358 | -3.443007 |
| 9  | 1  | 0 | 1.441266  | -0.537940 | -3.427307 |
| 10 | 1  | 0 | 0.113254  | -1.239097 | -4.363037 |
| 11 | 6  | 0 | 0.089202  | 1.520704  | -2.217612 |
| 12 | 1  | 0 | -0.508762 | 2.438462  | -2.141508 |
| 13 | 1  | 0 | 1.132462  | 1.838589  | -2.372521 |
| 14 | 6  | 0 | -0.089202 | -1.520704 | -2.217612 |
| 15 | 1  | 0 | 0.508762  | -2.438462 | -2.141508 |
| 16 | 1  | 0 | -1.132462 | -1.838589 | -2.372521 |
| 17 | 1  | 0 | -0.013957 | -2.421222 | 0.481344  |
| 18 | 1  | 0 | 0.013957  | 2.421222  | 0.481344  |
| 19 | 52 | 0 | 0.000000  | 0.000000  | 1.897733  |

-----

## Optimization of 2CHX

### 2CHO

-----

| Center | Atomic | Atomic | Coordinates (Angstroms) |   |   |
|--------|--------|--------|-------------------------|---|---|
| Number | Number | Type   | X                       | Y | Z |

-----

|   |   |   |          |          |           |
|---|---|---|----------|----------|-----------|
| 1 | 6 | 0 | 0.004904 | 0.719861 | -0.009337 |
| 2 | 6 | 0 | 1.004620 | 1.677358 | 0.014407  |

S87

|    |   |   |           |           |           |
|----|---|---|-----------|-----------|-----------|
| 3  | 6 | 0 | 0.348754  | 2.971717  | -0.011848 |
| 4  | 6 | 0 | -1.004620 | 2.737882  | -0.049877 |
| 5  | 6 | 0 | 3.197875  | 2.852635  | 0.405818  |
| 6  | 1 | 0 | 3.090661  | 3.031334  | 1.486767  |
| 7  | 1 | 0 | 4.273711  | 2.775488  | 0.197990  |
| 8  | 6 | 0 | 2.593328  | 4.051885  | -0.363648 |
| 9  | 1 | 0 | 2.667742  | 3.861504  | -1.444999 |
| 10 | 1 | 0 | 3.168537  | 4.964130  | -0.154662 |
| 11 | 6 | 0 | 2.506765  | 1.517545  | 0.026681  |
| 12 | 1 | 0 | 2.805416  | 0.716242  | 0.712900  |
| 13 | 1 | 0 | 2.849811  | 1.201767  | -0.970668 |
| 14 | 6 | 0 | 1.109445  | 4.277614  | 0.026494  |
| 15 | 1 | 0 | 0.646871  | 5.020309  | -0.637308 |
| 16 | 1 | 0 | 1.072000  | 4.698221  | 1.043253  |
| 17 | 8 | 0 | -1.251757 | 1.356542  | -0.048371 |
| 18 | 1 | 0 | -1.878494 | 3.368078  | -0.078441 |
| 19 | 6 | 0 | -0.004904 | -0.719861 | -0.009337 |
| 20 | 6 | 0 | -1.004620 | -1.677358 | 0.014407  |
| 21 | 8 | 0 | 1.251757  | -1.356542 | -0.048371 |
| 22 | 6 | 0 | -0.348754 | -2.971717 | -0.011848 |
| 23 | 6 | 0 | -2.506765 | -1.517545 | 0.026681  |
| 24 | 6 | 0 | 1.004620  | -2.737882 | -0.049877 |
| 25 | 6 | 0 | -1.109445 | -4.277614 | 0.026494  |
| 26 | 6 | 0 | -3.197875 | -2.852635 | 0.405818  |
| 27 | 1 | 0 | -2.805416 | -0.716242 | 0.712900  |
| 28 | 1 | 0 | -2.849811 | -1.201767 | -0.970668 |
| 29 | 1 | 0 | 1.878494  | -3.368078 | -0.078441 |
| 30 | 6 | 0 | -2.593328 | -4.051885 | -0.363648 |
| 31 | 1 | 0 | -0.646871 | -5.020309 | -0.637308 |



|    |   |   |           |           |           |
|----|---|---|-----------|-----------|-----------|
| 32 | 1 | 0 | -1.072000 | -4.698221 | 1.043253  |
| 33 | 1 | 0 | -3.090661 | -3.031334 | 1.486767  |
| 34 | 1 | 0 | -4.273711 | -2.775488 | 0.197990  |
| 35 | 1 | 0 | -2.667742 | -3.861504 | -1.444999 |
| 36 | 1 | 0 | -3.168537 | -4.964130 | -0.154662 |

## 2CHS

| Center<br>Number | Atomic<br>Number | Atomic<br>Type | Coordinates (Angstroms) |          |           |
|------------------|------------------|----------------|-------------------------|----------|-----------|
|                  |                  |                | X                       | Y        | Z         |
| 1                | 6                | 0              | -0.336298               | 0.646734 | -0.365590 |
| 2                | 6                | 0              | 0.115742                | 1.884562 | 0.066429  |
| 3                | 6                | 0              | -0.837369               | 2.961584 | -0.142523 |
| 4                | 6                | 0              | -1.999669               | 2.544785 | -0.747769 |
| 5                | 6                | 0              | 1.508477                | 3.480686 | 1.472110  |
| 6                | 1                | 0              | 0.926725                | 3.392884 | 2.402369  |
| 7                | 1                | 0              | 2.544416                | 3.706265 | 1.759693  |
| 8                | 6                | 0              | 0.927718                | 4.626800 | 0.615023  |
| 9                | 1                | 0              | 1.487655                | 4.691063 | -0.330113 |
| 10               | 1                | 0              | 1.049598                | 5.589901 | 1.129326  |
| 11               | 6                | 0              | 1.475662                | 2.141777 | 0.697761  |
| 12               | 1                | 0              | 1.754458                | 1.306606 | 1.352804  |
| 13               | 1                | 0              | 2.241454                | 2.178169 | -0.092030 |
| 14               | 6                | 0              | -0.572592               | 4.384340 | 0.326336  |
| 15               | 1                | 0              | -0.942307               | 5.104715 | -0.415616 |
| 16               | 1                | 0              | -1.140363               | 4.569135 | 1.251607  |
| 17               | 1                | 0              | -2.870475               | 3.132837 | -1.002979 |

|    |    |   |           |           |           |
|----|----|---|-----------|-----------|-----------|
| 18 | 6  | 0 | 0.336298  | -0.646734 | -0.365590 |
| 19 | 6  | 0 | -0.115742 | -1.884562 | 0.066429  |
| 20 | 6  | 0 | 0.837369  | -2.961584 | -0.142523 |
| 21 | 6  | 0 | -1.475662 | -2.141777 | 0.697761  |
| 22 | 6  | 0 | 1.999669  | -2.544785 | -0.747769 |
| 23 | 6  | 0 | 0.572592  | -4.384340 | 0.326336  |
| 24 | 6  | 0 | -1.508477 | -3.480686 | 1.472110  |
| 25 | 1  | 0 | -1.754458 | -1.306606 | 1.352804  |
| 26 | 1  | 0 | -2.241454 | -2.178169 | -0.092030 |
| 27 | 1  | 0 | 2.870475  | -3.132837 | -1.002979 |
| 28 | 6  | 0 | -0.927718 | -4.626800 | 0.615023  |
| 29 | 1  | 0 | 0.942307  | -5.104715 | -0.415616 |
| 30 | 1  | 0 | 1.140363  | -4.569135 | 1.251607  |
| 31 | 1  | 0 | -0.926725 | -3.392884 | 2.402369  |
| 32 | 1  | 0 | -2.544416 | -3.706265 | 1.759693  |
| 33 | 1  | 0 | -1.487655 | -4.691063 | -0.330113 |
| 34 | 1  | 0 | -1.049598 | -5.589901 | 1.129326  |
| 35 | 16 | 0 | 1.999669  | -0.793578 | -1.099107 |
| 36 | 16 | 0 | -1.999669 | 0.793578  | -1.099107 |

## 2CHSe

| Center<br>Number | Atomic<br>Number | Atomic<br>Type | Coordinates (Angstroms) |          |           |
|------------------|------------------|----------------|-------------------------|----------|-----------|
|                  |                  |                | X                       | Y        | Z         |
| 1                | 6                | 0              | -0.235798               | 0.691716 | -0.194969 |
| 2                | 6                | 0              | 0.353128                | 1.813464 | 0.365594  |
| 3                | 6                | 0              | -0.353128               | 3.067991 | 0.144212  |

S90

|    |   |   |           |           |           |
|----|---|---|-----------|-----------|-----------|
| 4  | 6 | 0 | -1.493587 | 2.960100  | -0.616617 |
| 5  | 6 | 0 | 1.855267  | 3.025269  | 2.031165  |
| 6  | 1 | 0 | 1.167531  | 2.992466  | 2.889975  |
| 7  | 1 | 0 | 2.876701  | 3.027783  | 2.435603  |
| 8  | 6 | 0 | 1.594455  | 4.312649  | 1.219900  |
| 9  | 1 | 0 | 2.259178  | 4.329033  | 0.342913  |
| 10 | 1 | 0 | 1.831032  | 5.200744  | 1.821890  |
| 11 | 6 | 0 | 1.660689  | 1.771777  | 1.147071  |
| 12 | 1 | 0 | 1.709696  | 0.856400  | 1.750123  |
| 13 | 1 | 0 | 2.501710  | 1.714203  | 0.438088  |
| 14 | 6 | 0 | 0.117268  | 4.377144  | 0.767452  |
| 15 | 1 | 0 | -0.033384 | 5.206820  | 0.063938  |
| 16 | 1 | 0 | -0.506313 | 4.596875  | 1.648396  |
| 17 | 1 | 0 | -2.172338 | 3.758272  | -0.892305 |
| 18 | 6 | 0 | 0.235798  | -0.691716 | -0.194969 |
| 19 | 6 | 0 | -0.353128 | -1.813464 | 0.365594  |
| 20 | 6 | 0 | 0.353128  | -3.067991 | 0.144212  |
| 21 | 6 | 0 | -1.660689 | -1.771777 | 1.147071  |
| 22 | 6 | 0 | 1.493587  | -2.960100 | -0.616617 |
| 23 | 6 | 0 | -0.117268 | -4.377144 | 0.767452  |
| 24 | 6 | 0 | -1.855267 | -3.025269 | 2.031165  |
| 25 | 1 | 0 | -1.709696 | -0.856400 | 1.750123  |
| 26 | 1 | 0 | -2.501710 | -1.714203 | 0.438088  |
| 27 | 1 | 0 | 2.172338  | -3.758272 | -0.892305 |
| 28 | 6 | 0 | -1.594455 | -4.312649 | 1.219900  |
| 29 | 1 | 0 | 0.033384  | -5.206820 | 0.063938  |
| 30 | 1 | 0 | 0.506313  | -4.596875 | 1.648396  |
| 31 | 1 | 0 | -1.167531 | -2.992466 | 2.889975  |
| 32 | 1 | 0 | -2.876701 | -3.027783 | 2.435603  |

|    |    |   |           |           |           |
|----|----|---|-----------|-----------|-----------|
| 33 | 1  | 0 | -2.259178 | -4.329033 | 0.342913  |
| 34 | 1  | 0 | -1.831032 | -5.200744 | 1.821890  |
| 35 | 34 | 0 | -1.845605 | 1.174099  | -1.167102 |
| 36 | 34 | 0 | 1.845605  | -1.174099 | -1.167102 |

## 2CHTe

| Center<br>Number | Atomic<br>Number | Atomic<br>Type | Coordinates (Angstroms) |           |           |
|------------------|------------------|----------------|-------------------------|-----------|-----------|
|                  |                  |                | X                       | Y         | Z         |
| 1                | 6                | 0              | -0.018584               | 0.733052  | -0.034620 |
| 2                | 6                | 0              | 0.754657                | 1.591127  | 0.730552  |
| 3                | 6                | 0              | 0.549234                | 3.029041  | 0.552398  |
| 4                | 6                | 0              | -0.381014               | 3.414913  | -0.384893 |
| 5                | 6                | 0              | 2.285412                | 2.118077  | 2.717747  |
| 6                | 1                | 0              | 1.502433                | 2.271467  | 3.476240  |
| 7                | 1                | 0              | 3.174323                | 1.743644  | 3.243839  |
| 8                | 6                | 0              | 2.591179                | 3.463775  | 2.028519  |
| 9                | 1                | 0              | 3.353041                | 3.309955  | 1.249362  |
| 10               | 1                | 0              | 3.005812                | 4.180776  | 2.750553  |
| 11               | 6                | 0              | 1.825579                | 1.064898  | 1.684670  |
| 12               | 1                | 0              | 1.465990                | 0.159262  | 2.188284  |
| 13               | 1                | 0              | 2.699744                | 0.751216  | 1.091468  |
| 14               | 6                | 0              | 1.303187                | 4.047432  | 1.406074  |
| 15               | 1                | 0              | 1.532933                | 4.939033  | 0.807931  |
| 16               | 1                | 0              | 0.644991                | 4.380248  | 2.224461  |
| 17               | 1                | 0              | -0.635538               | 4.442825  | -0.619630 |
| 18               | 6                | 0              | 0.018584                | -0.733052 | -0.034620 |

|    |    |   |           |           |           |
|----|----|---|-----------|-----------|-----------|
| 19 | 6  | 0 | -0.754657 | -1.591127 | 0.730552  |
| 20 | 6  | 0 | -0.549234 | -3.029041 | 0.552398  |
| 21 | 6  | 0 | -1.825579 | -1.064898 | 1.684670  |
| 22 | 6  | 0 | 0.381014  | -3.414913 | -0.384893 |
| 23 | 6  | 0 | -1.303187 | -4.047432 | 1.406074  |
| 24 | 6  | 0 | -2.285412 | -2.118077 | 2.717747  |
| 25 | 1  | 0 | -1.465990 | -0.159262 | 2.188284  |
| 26 | 1  | 0 | -2.699744 | -0.751216 | 1.091468  |
| 27 | 1  | 0 | 0.635538  | -4.442825 | -0.619630 |
| 28 | 6  | 0 | -2.591179 | -3.463775 | 2.028519  |
| 29 | 1  | 0 | -1.532933 | -4.939033 | 0.807931  |
| 30 | 1  | 0 | -0.644991 | -4.380248 | 2.224461  |
| 31 | 1  | 0 | -1.502433 | -2.271467 | 3.476240  |
| 32 | 1  | 0 | -3.174323 | -1.743644 | 3.243839  |
| 33 | 1  | 0 | -3.353041 | -3.309955 | 1.249362  |
| 34 | 1  | 0 | -3.005812 | -4.180776 | 2.750553  |
| 35 | 52 | 0 | 1.303187  | -1.812415 | -1.319523 |
| 36 | 52 | 0 | -1.303187 | 1.812415  | -1.319523 |

## Optimization of 3CHX

### 3CHO

| Center<br>Number | Atomic<br>Number | Atomic<br>Type | Coordinates (Angstroms) |          |           |
|------------------|------------------|----------------|-------------------------|----------|-----------|
|                  |                  |                | X                       | Y        | Z         |
| 1                | 6                | 0              | 1.132967                | 1.003345 | -0.010745 |
| 2                | 6                | 0              | 0.722092                | 2.327175 | -0.005320 |

S93

|    |   |   |           |           |           |
|----|---|---|-----------|-----------|-----------|
| 3  | 6 | 0 | -0.722090 | 2.327177  | 0.005329  |
| 4  | 6 | 0 | -1.132970 | 1.003349  | 0.010764  |
| 5  | 6 | 0 | 0.678537  | 4.815543  | 0.371416  |
| 6  | 1 | 0 | 0.493488  | 4.800051  | 1.456439  |
| 7  | 1 | 0 | 1.230936  | 5.739317  | 0.151854  |
| 8  | 6 | 0 | -0.678524 | 4.815532  | -0.371458 |
| 9  | 1 | 0 | -0.493482 | 4.799997  | -1.456481 |
| 10 | 1 | 0 | -1.230919 | 5.739315  | -0.151925 |
| 11 | 6 | 0 | 1.544560  | 3.593879  | -0.027351 |
| 12 | 1 | 0 | 2.415109  | 3.499573  | 0.632259  |
| 13 | 1 | 0 | 1.949774  | 3.750249  | -1.038915 |
| 14 | 6 | 0 | -1.544547 | 3.593887  | 0.027362  |
| 15 | 1 | 0 | -2.415120 | 3.499578  | -0.632211 |
| 16 | 1 | 0 | -1.949715 | 3.750283  | 1.038945  |
| 17 | 8 | 0 | -0.000002 | 0.162800  | 0.000004  |
| 18 | 6 | 0 | 2.416985  | 0.357419  | -0.027296 |
| 19 | 6 | 0 | 2.842090  | -0.960103 | 0.040538  |
| 20 | 8 | 0 | 3.539480  | 1.203167  | -0.139661 |
| 21 | 6 | 0 | 4.290644  | -0.940480 | -0.033008 |
| 22 | 6 | 0 | 2.043490  | -2.238720 | 0.137367  |
| 23 | 6 | 0 | 4.672071  | 0.375153  | -0.140874 |
| 24 | 6 | 0 | 5.133857  | -2.193291 | 0.037278  |
| 25 | 6 | 0 | 2.953070  | -3.423980 | 0.550833  |
| 26 | 1 | 0 | 1.211705  | -2.122953 | 0.842137  |
| 27 | 1 | 0 | 1.585348  | -2.459918 | -0.839330 |
| 28 | 1 | 0 | 5.620258  | 0.881255  | -0.220776 |
| 29 | 6 | 0 | 4.270535  | -3.446352 | -0.261220 |
| 30 | 1 | 0 | 5.980144  | -2.135738 | -0.660334 |
| 31 | 1 | 0 | 5.564222  | -2.293368 | 1.045656  |

|    |   |   |           |           |           |
|----|---|---|-----------|-----------|-----------|
| 32 | 1 | 0 | 3.194916  | -3.349124 | 1.622157  |
| 33 | 1 | 0 | 2.407327  | -4.366803 | 0.409346  |
| 34 | 1 | 0 | 4.031883  | -3.485374 | -1.334867 |
| 35 | 1 | 0 | 4.846046  | -4.351388 | -0.023907 |
| 36 | 6 | 0 | -4.672077 | 0.375161  | 0.140833  |
| 37 | 6 | 0 | -4.290647 | -0.940475 | 0.032997  |
| 38 | 8 | 0 | -3.539481 | 1.203168  | 0.139717  |
| 39 | 6 | 0 | -2.842091 | -0.960099 | -0.040518 |
| 40 | 6 | 0 | -5.133860 | -2.193284 | -0.037318 |
| 41 | 6 | 0 | -2.416989 | 0.357424  | 0.027306  |
| 42 | 6 | 0 | -2.043491 | -2.238717 | -0.137339 |
| 43 | 6 | 0 | -4.270548 | -3.446347 | 0.261200  |
| 44 | 1 | 0 | -5.980168 | -2.135733 | 0.660269  |
| 45 | 1 | 0 | -5.564195 | -2.293356 | -1.045709 |
| 46 | 6 | 0 | -2.953066 | -3.423976 | -0.550824 |
| 47 | 1 | 0 | -1.211696 | -2.122948 | -0.842097 |
| 48 | 1 | 0 | -1.585364 | -2.459919 | 0.839364  |
| 49 | 1 | 0 | -4.031920 | -3.485370 | 1.334852  |
| 50 | 1 | 0 | -4.846055 | -4.351382 | 0.023874  |
| 51 | 1 | 0 | -3.194889 | -3.349119 | -1.622153 |
| 52 | 1 | 0 | -2.407327 | -4.366800 | -0.409327 |
| 53 | 1 | 0 | -5.620266 | 0.881265  | 0.220696  |

-----

### 3CHS

-----

| Center | Atomic | Atomic | Coordinates (Angstroms) |   |   |
|--------|--------|--------|-------------------------|---|---|
| Number | Number | Type   | X                       | Y | Z |

-----

|    |   |   |           |           |           |
|----|---|---|-----------|-----------|-----------|
| 1  | 6 | 0 | -1.276817 | 0.510677  | 0.185942  |
| 2  | 6 | 0 | -0.716215 | 1.777084  | 0.110912  |
| 3  | 6 | 0 | 0.716215  | 1.777083  | -0.110907 |
| 4  | 6 | 0 | 1.276816  | 0.510677  | -0.185936 |
| 5  | 6 | 0 | -0.722474 | 4.293200  | -0.270996 |
| 6  | 1 | 0 | -0.697087 | 4.274355  | -1.371141 |
| 7  | 1 | 0 | -1.244702 | 5.213429  | 0.024268  |
| 8  | 6 | 0 | 0.722476  | 4.293200  | 0.270995  |
| 9  | 1 | 0 | 0.697089  | 4.274357  | 1.371141  |
| 10 | 1 | 0 | 1.244704  | 5.213427  | -0.024270 |
| 11 | 6 | 0 | -1.502516 | 3.070763  | 0.264364  |
| 12 | 1 | 0 | -2.476581 | 2.981458  | -0.233326 |
| 13 | 1 | 0 | -1.720072 | 3.238073  | 1.330174  |
| 14 | 6 | 0 | 1.502516  | 3.070761  | -0.264363 |
| 15 | 1 | 0 | 2.476582  | 2.981457  | 0.233327  |
| 16 | 1 | 0 | 1.720072  | 3.238069  | -1.330173 |
| 17 | 6 | 0 | -2.654731 | 0.112716  | 0.446702  |
| 18 | 6 | 0 | -3.457378 | -0.798763 | -0.223486 |
| 19 | 6 | 0 | -4.773704 | -0.966721 | 0.368819  |
| 20 | 6 | 0 | -3.041246 | -1.578111 | -1.461940 |
| 21 | 6 | 0 | -4.961078 | -0.200789 | 1.495450  |
| 22 | 6 | 0 | -5.837206 | -1.860001 | -0.251855 |
| 23 | 6 | 0 | -4.262350 | -2.140970 | -2.226951 |
| 24 | 1 | 0 | -2.427146 | -0.948942 | -2.118542 |
| 25 | 1 | 0 | -2.400330 | -2.421156 | -1.161914 |
| 26 | 1 | 0 | -5.843892 | -0.125841 | 2.115389  |
| 27 | 6 | 0 | -5.231477 | -2.861033 | -1.263793 |
| 28 | 1 | 0 | -6.390983 | -2.393766 | 0.532101  |
| 29 | 1 | 0 | -6.570814 | -1.230940 | -0.779795 |



|    |    |   |           |           |           |
|----|----|---|-----------|-----------|-----------|
| 30 | 1  | 0 | -4.797010 | -1.325033 | -2.736712 |
| 31 | 1  | 0 | -3.912985 | -2.833077 | -3.005135 |
| 32 | 1  | 0 | -4.687300 | -3.654307 | -0.729400 |
| 33 | 1  | 0 | -6.040835 | -3.346432 | -1.826126 |
| 34 | 6  | 0 | 4.961076  | -0.200781 | -1.495448 |
| 35 | 6  | 0 | 4.773703  | -0.966719 | -0.368822 |
| 36 | 6  | 0 | 3.457378  | -0.798765 | 0.223485  |
| 37 | 6  | 0 | 5.837207  | -1.860001 | 0.251847  |
| 38 | 6  | 0 | 2.654729  | 0.112716  | -0.446698 |
| 39 | 6  | 0 | 3.041248  | -1.578119 | 1.461937  |
| 40 | 6  | 0 | 5.231480  | -2.861038 | 1.263782  |
| 41 | 1  | 0 | 6.390983  | -2.393763 | -0.532112 |
| 42 | 1  | 0 | 6.570815  | -1.230942 | 0.779789  |
| 43 | 6  | 0 | 4.262354  | -2.140979 | 2.226944  |
| 44 | 1  | 0 | 2.427149  | -0.948954 | 2.118542  |
| 45 | 1  | 0 | 2.400333  | -2.421163 | 1.161908  |
| 46 | 1  | 0 | 4.687303  | -3.654310 | 0.729386  |
| 47 | 1  | 0 | 6.040839  | -3.346438 | 1.826112  |
| 48 | 1  | 0 | 4.797013  | -1.325045 | 2.736707  |
| 49 | 1  | 0 | 3.912991  | -2.833090 | 3.005126  |
| 50 | 1  | 0 | 5.843890  | -0.125828 | -2.115388 |
| 51 | 16 | 0 | 3.528168  | 0.785128  | -1.900705 |
| 52 | 16 | 0 | -0.000001 | -0.767253 | 0.000002  |
| 53 | 16 | 0 | -3.528170 | 0.785117  | 1.900712  |

-----

**3CHSe**

-----

| Center | Atomic | Atomic | Coordinates (Angstroms) |
|--------|--------|--------|-------------------------|
|--------|--------|--------|-------------------------|

S97

| Number | Number | Type | X         | Y         | Z         |
|--------|--------|------|-----------|-----------|-----------|
| -----  |        |      |           |           |           |
| 1      | 6      | 0    | 1.323228  | -0.344775 | 0.117371  |
| 2      | 6      | 0    | 0.723245  | -1.593082 | 0.074227  |
| 3      | 6      | 0    | -0.723245 | -1.593081 | -0.074233 |
| 4      | 6      | 0    | -1.323228 | -0.344774 | -0.117372 |
| 5      | 6      | 0    | 0.710456  | -4.117291 | -0.300542 |
| 6      | 1      | 0    | 0.639575  | -4.099574 | -1.398850 |
| 7      | 1      | 0    | 1.245646  | -5.036626 | -0.026221 |
| 8      | 6      | 0    | -0.710458 | -4.117292 | 0.300523  |
| 9      | 1      | 0    | -0.639577 | -4.099580 | 1.398832  |
| 10     | 1      | 0    | -1.245647 | -5.036626 | 0.026199  |
| 11     | 6      | 0    | 1.508966  | -2.893266 | 0.201083  |
| 12     | 1      | 0    | 2.465447  | -2.805554 | -0.329509 |
| 13     | 1      | 0    | 1.763684  | -3.057529 | 1.260021  |
| 14     | 6      | 0    | -1.508967 | -2.893264 | -0.201096 |
| 15     | 1      | 0    | -2.465447 | -2.805554 | 0.329496  |
| 16     | 1      | 0    | -1.763685 | -3.057522 | -1.260034 |
| 17     | 6      | 0    | 2.732958  | -0.009700 | 0.311667  |
| 18     | 6      | 0    | 3.596845  | 0.652087  | -0.545918 |
| 19     | 6      | 0    | 4.938322  | 0.883288  | -0.027415 |
| 20     | 6      | 0    | 3.193580  | 1.136169  | -1.933531 |
| 21     | 6      | 0    | 5.145009  | 0.434588  | 1.255879  |
| 22     | 6      | 0    | 6.031312  | 1.519734  | -0.878204 |
| 23     | 6      | 0    | 4.417785  | 1.416288  | -2.835330 |
| 24     | 1      | 0    | 2.519215  | 0.410093  | -2.404729 |
| 25     | 1      | 0    | 2.615536  | 2.068679  | -1.835108 |
| 26     | 1      | 0    | 6.063174  | 0.492942  | 1.828055  |
| 27     | 6      | 0    | 5.456723  | 2.284194  | -2.093269 |

|    |    |   |           |           |           |
|----|----|---|-----------|-----------|-----------|
| 28 | 1  | 0 | 6.650333  | 2.185871  | -0.262512 |
| 29 | 1  | 0 | 6.699584  | 0.727460  | -1.250903 |
| 30 | 1  | 0 | 4.887895  | 0.468570  | -3.139401 |
| 31 | 1  | 0 | 4.083418  | 1.919606  | -3.752736 |
| 32 | 1  | 0 | 4.977523  | 3.217340  | -1.760250 |
| 33 | 1  | 0 | 6.276291  | 2.564599  | -2.769075 |
| 34 | 6  | 0 | -5.145008 | 0.434595  | -1.255878 |
| 35 | 6  | 0 | -4.938322 | 0.883287  | 0.027418  |
| 36 | 6  | 0 | -3.596845 | 0.652084  | 0.545922  |
| 37 | 6  | 0 | -6.031313 | 1.519730  | 0.878210  |
| 38 | 6  | 0 | -2.732958 | -0.009698 | -0.311667 |
| 39 | 6  | 0 | -3.193580 | 1.136158  | 1.933537  |
| 40 | 6  | 0 | -5.456724 | 2.284183  | 2.093279  |
| 41 | 1  | 0 | -6.650333 | 2.185869  | 0.262522  |
| 42 | 1  | 0 | -6.699584 | 0.727453  | 1.250905  |
| 43 | 6  | 0 | -4.417786 | 1.416274  | 2.835337  |
| 44 | 1  | 0 | -2.519216 | 0.410080  | 2.404731  |
| 45 | 1  | 0 | -2.615537 | 2.068669  | 1.835119  |
| 46 | 1  | 0 | -4.977524 | 3.217331  | 1.760265  |
| 47 | 1  | 0 | -6.276292 | 2.564584  | 2.769087  |
| 48 | 1  | 0 | -4.887897 | 0.468554  | 3.139403  |
| 49 | 1  | 0 | -4.083419 | 1.919587  | 3.752746  |
| 50 | 1  | 0 | -6.063173 | 0.492951  | -1.828054 |
| 51 | 34 | 0 | -3.603822 | -0.390314 | -2.004968 |
| 52 | 34 | 0 | 0.000000  | 1.059160  | 0.000002  |
| 53 | 34 | 0 | 3.603823  | -0.390325 | 2.004966  |

| Center | Atomic | Atomic | Coordinates (Angstroms) |           |           |
|--------|--------|--------|-------------------------|-----------|-----------|
| Number | Number | Type   | X                       | Y         | Z         |
| -----  |        |        |                         |           |           |
| 1      | 6      | 0      | 1.377567                | -0.070060 | -0.230940 |
| 2      | 6      | 0      | 0.729782                | -0.044584 | -1.454948 |
| 3      | 6      | 0      | -0.729781               | 0.044595  | -1.454948 |
| 4      | 6      | 0      | -1.377568               | 0.070061  | -0.230940 |
| 5      | 6      | 0      | 0.700661                | 0.321049  | -3.991295 |
| 6      | 1      | 0      | 0.597161                | 1.416922  | -3.977598 |
| 7      | 1      | 0      | 1.246481                | 0.059820  | -4.908345 |
| 8      | 6      | 0      | -0.700660               | -0.321012 | -3.991298 |
| 9      | 1      | 0      | -0.597160               | -1.416885 | -3.977612 |
| 10     | 1      | 0      | -1.246479               | -0.059775 | -4.908346 |
| 11     | 6      | 0      | 1.509776                | -0.152852 | -2.764330 |
| 12     | 1      | 0      | 2.452713                | 0.401141  | -2.682283 |
| 13     | 1      | 0      | 1.793471                | -1.206606 | -2.918941 |
| 14     | 6      | 0      | -1.509775               | 0.152878  | -2.764329 |
| 15     | 1      | 0      | -2.452712               | -0.401114 | -2.682289 |
| 16     | 1      | 0      | -1.793468               | 1.206634  | -2.918931 |
| 17     | 6      | 0      | 2.822280                | -0.165102 | 0.004657  |
| 18     | 6      | 0      | 3.714873                | 0.880644  | 0.175132  |
| 19     | 6      | 0      | 5.118001                | 0.541496  | 0.415741  |
| 20     | 6      | 0      | 3.249998                | 2.335898  | 0.171359  |
| 21     | 6      | 0      | 5.434325                | -0.795701 | 0.482062  |
| 22     | 6      | 0      | 6.184371                | 1.628708  | 0.538613  |
| 23     | 6      | 0      | 4.407408                | 3.339965  | -0.029131 |
| 24     | 1      | 0      | 2.475585                | 2.479769  | -0.592121 |
| 25     | 1      | 0      | 2.763463                | 2.550832  | 1.136592  |
| S100   |        |        |                         |           |           |

|    |    |   |           |           |           |
|----|----|---|-----------|-----------|-----------|
| 26 | 1  | 0 | 6.430016  | -1.190346 | 0.653406  |
| 27 | 6  | 0 | 5.589007  | 3.006547  | 0.904766  |
| 28 | 1  | 0 | 6.941834  | 1.327461  | 1.274152  |
| 29 | 1  | 0 | 6.705939  | 1.724075  | -0.427116 |
| 30 | 1  | 0 | 4.754905  | 3.313665  | -1.073391 |
| 31 | 1  | 0 | 4.039917  | 4.357480  | 0.162405  |
| 32 | 1  | 0 | 5.239769  | 3.003620  | 1.948423  |
| 33 | 1  | 0 | 6.370448  | 3.775008  | 0.826409  |
| 34 | 6  | 0 | -5.434325 | 0.795696  | 0.482065  |
| 35 | 6  | 0 | -5.118001 | -0.541500 | 0.415740  |
| 36 | 6  | 0 | -3.714873 | -0.880646 | 0.175124  |
| 37 | 6  | 0 | -6.184370 | -1.628713 | 0.538607  |
| 38 | 6  | 0 | -2.822280 | 0.165101  | 0.004657  |
| 39 | 6  | 0 | -3.249998 | -2.335900 | 0.171343  |
| 40 | 6  | 0 | -5.589005 | -3.006554 | 0.904751  |
| 41 | 1  | 0 | -6.941832 | -1.327470 | 1.274149  |
| 42 | 1  | 0 | -6.705939 | -1.724074 | -0.427121 |
| 43 | 6  | 0 | -4.407407 | -3.339966 | -0.029150 |
| 44 | 1  | 0 | -2.475585 | -2.479767 | -0.592138 |
| 45 | 1  | 0 | -2.763461 | -2.550838 | 1.136575  |
| 46 | 1  | 0 | -5.239765 | -3.003633 | 1.948407  |
| 47 | 1  | 0 | -6.370446 | -3.775015 | 0.826391  |
| 48 | 1  | 0 | -4.754906 | -3.313661 | -1.073409 |
| 49 | 1  | 0 | -4.039916 | -4.357482 | 0.162381  |
| 50 | 1  | 0 | -6.430017 | 1.190341  | 0.653412  |
| 51 | 52 | 0 | -3.796998 | 2.031138  | 0.189782  |
| 52 | 52 | 0 | -0.000000 | -0.000006 | 1.360774  |
| 53 | 52 | 0 | 3.796998  | -2.031140 | 0.189772  |

## Optimization of 4CHX

### 4CHO

| -----  |        |        |                         |           |           |      |
|--------|--------|--------|-------------------------|-----------|-----------|------|
| Center | Atomic | Atomic | Coordinates (Angstroms) |           |           |      |
| Number | Number | Type   | X                       | Y         | Z         |      |
| -----  |        |        |                         |           |           |      |
| 1      | 6      | 0      | 2.671135                | 1.188744  | -0.087883 |      |
| 2      | 6      | 0      | 1.882621                | 2.324430  | -0.192847 |      |
| 3      | 6      | 0      | 0.508194                | 1.887983  | -0.245544 |      |
| 4      | 6      | 0      | 0.511671                | 0.502589  | -0.165366 |      |
| 5      | 6      | 0      | 1.072869                | 4.701147  | -0.013672 |      |
| 6      | 1      | 0      | 0.826273                | 4.698055  | 1.059198  |      |
| 7      | 1      | 0      | 1.337641                | 5.733292  | -0.280479 |      |
| 8      | 6      | 0      | -0.167644               | 4.243265  | -0.816840 |      |
| 9      | 1      | 0      | 0.088492                | 4.213989  | -1.886976 |      |
| 10     | 1      | 0      | -0.983962               | 4.969192  | -0.700264 |      |
| 11     | 6      | 0      | 2.289533                | 3.776841  | -0.271986 |      |
| 12     | 1      | 0      | 3.099235                | 3.989471  | 0.436094  |      |
| 13     | 1      | 0      | 2.701430                | 3.988063  | -1.270668 |      |
| 14     | 6      | 0      | -0.654446               | 2.845436  | -0.358586 |      |
| 15     | 1      | 0      | -1.412366               | 2.450540  | -1.045631 |      |
| 16     | 1      | 0      | -1.151002               | 2.938436  | 0.619680  |      |
| 17     | 8      | 0      | 1.843888                | 0.046650  | -0.067691 |      |
| 18     | 6      | 0      | 4.087387                | 0.961878  | -0.003195 |      |
| 19     | 6      | 0      | 4.879332                | -0.156485 | 0.205542  |      |
| 20     | 8      | 0      | 4.913002                | 2.093876  | -0.162285 |      |
| 21     | 6      | 0      | 6.258526                | 0.291371  | 0.174010  |      |
|        |        |        |                         |           |           | S102 |

|    |   |   |           |           |           |
|----|---|---|-----------|-----------|-----------|
| 22 | 6 | 0 | 4.490255  | -1.601893 | 0.408766  |
| 23 | 6 | 0 | 6.238223  | 1.647270  | -0.048591 |
| 24 | 6 | 0 | 7.429550  | -0.639835 | 0.391308  |
| 25 | 6 | 0 | 5.685152  | -2.418444 | 0.964268  |
| 26 | 1 | 0 | 3.623343  | -1.678562 | 1.075779  |
| 27 | 1 | 0 | 4.172485  | -2.035929 | -0.552050 |
| 28 | 1 | 0 | 6.996785  | 2.406519  | -0.147339 |
| 29 | 6 | 0 | 6.993599  | -2.115065 | 0.195262  |
| 30 | 1 | 0 | 8.258272  | -0.391832 | -0.285383 |
| 31 | 1 | 0 | 7.813539  | -0.518399 | 1.415927  |
| 32 | 1 | 0 | 5.833200  | -2.181020 | 2.028936  |
| 33 | 1 | 0 | 5.451958  | -3.490146 | 0.903109  |
| 34 | 1 | 0 | 6.837803  | -2.316776 | -0.875361 |
| 35 | 1 | 0 | 7.796866  | -2.781706 | 0.537238  |
| 36 | 6 | 0 | -4.087387 | -0.961877 | -0.003198 |
| 37 | 6 | 0 | -4.879333 | 0.156484  | 0.205546  |
| 38 | 6 | 0 | -6.258526 | -0.291372 | 0.174004  |
| 39 | 6 | 0 | -6.238222 | -1.647269 | -0.048610 |
| 40 | 6 | 0 | -5.685157 | 2.418437  | 0.964283  |
| 41 | 1 | 0 | -5.833210 | 2.181006  | 2.028948  |
| 42 | 1 | 0 | -5.451963 | 3.490140  | 0.903133  |
| 43 | 6 | 0 | -6.993600 | 2.115064  | 0.195268  |
| 44 | 1 | 0 | -6.837798 | 2.316783  | -0.875353 |
| 45 | 1 | 0 | -7.796868 | 2.781702  | 0.537244  |
| 46 | 6 | 0 | -4.490257 | 1.601890  | 0.408780  |
| 47 | 1 | 0 | -3.623348 | 1.678555  | 1.075798  |
| 48 | 1 | 0 | -4.172483 | 2.035933  | -0.552031 |
| 49 | 6 | 0 | -7.429552 | 0.639832  | 0.391301  |
| 50 | 1 | 0 | -8.258269 | 0.391834  | -0.285398 |

|    |   |   |           |           |           |
|----|---|---|-----------|-----------|-----------|
| 51 | 1 | 0 | -7.813548 | 0.518390  | 1.415916  |
| 52 | 8 | 0 | -4.913000 | -2.093877 | -0.162288 |
| 53 | 1 | 0 | -6.996784 | -2.406516 | -0.147371 |
| 54 | 6 | 0 | -2.671134 | -1.188742 | -0.087884 |
| 55 | 6 | 0 | -1.882620 | -2.324429 | -0.192846 |
| 56 | 8 | 0 | -1.843888 | -0.046648 | -0.067689 |
| 57 | 6 | 0 | -0.508193 | -1.887982 | -0.245540 |
| 58 | 6 | 0 | -2.289532 | -3.776840 | -0.271984 |
| 59 | 6 | 0 | -0.511670 | -0.502587 | -0.165366 |
| 60 | 6 | 0 | 0.654448  | -2.845434 | -0.358579 |
| 61 | 6 | 0 | -1.072868 | -4.701145 | -0.013666 |
| 62 | 1 | 0 | -3.099235 | -3.989469 | 0.436095  |
| 63 | 1 | 0 | -2.701426 | -3.988063 | -1.270667 |
| 64 | 6 | 0 | 0.167647  | -4.243264 | -0.816832 |
| 65 | 1 | 0 | 1.412368  | -2.450539 | -1.045624 |
| 66 | 1 | 0 | 1.151002  | -2.938432 | 0.619688  |
| 67 | 1 | 0 | -0.826274 | -4.698052 | 1.059205  |
| 68 | 1 | 0 | -1.337639 | -5.733291 | -0.280472 |
| 69 | 1 | 0 | -0.088487 | -4.213990 | -1.886969 |
| 70 | 1 | 0 | 0.983964  | -4.969191 | -0.700253 |

#### 4CHS

| Center<br>Number | Atomic<br>Number | Atomic<br>Type | Coordinates (Angstroms) |          |          |
|------------------|------------------|----------------|-------------------------|----------|----------|
|                  |                  |                | X                       | Y        | Z        |
| 1                | 6                | 0              | 3.238946                | 0.399792 | 0.397007 |
| 2                | 6                | 0              | 2.683103                | 1.013060 | 1.510103 |

S104



|    |   |   |           |           |           |
|----|---|---|-----------|-----------|-----------|
| 3  | 6 | 0 | 1.252851  | 1.227389  | 1.414273  |
| 4  | 6 | 0 | 0.695960  | 0.803508  | 0.216261  |
| 5  | 6 | 0 | 2.571709  | 1.712898  | 3.954553  |
| 6  | 1 | 0 | 2.205076  | 0.759187  | 4.363672  |
| 7  | 1 | 0 | 3.160544  | 2.198215  | 4.744760  |
| 8  | 6 | 0 | 1.367352  | 2.592973  | 3.558922  |
| 9  | 1 | 0 | 1.733857  | 3.531201  | 3.115446  |
| 10 | 1 | 0 | 0.779494  | 2.863421  | 4.446548  |
| 11 | 6 | 0 | 3.478775  | 1.453332  | 2.730160  |
| 12 | 1 | 0 | 4.249499  | 0.708703  | 2.966799  |
| 13 | 1 | 0 | 4.017349  | 2.383736  | 2.494588  |
| 14 | 6 | 0 | 0.458735  | 1.848703  | 2.554129  |
| 15 | 1 | 0 | -0.312517 | 2.519629  | 2.155024  |
| 16 | 1 | 0 | -0.079342 | 1.055629  | 3.095177  |
| 17 | 6 | 0 | 4.629501  | 0.071998  | 0.107335  |
| 18 | 6 | 0 | 5.183139  | -1.107702 | -0.368409 |
| 19 | 6 | 0 | 6.618456  | -1.036086 | -0.583774 |
| 20 | 6 | 0 | 4.401817  | -2.380421 | -0.658536 |
| 21 | 6 | 0 | 7.147834  | 0.199006  | -0.291611 |
| 22 | 6 | 0 | 7.435548  | -2.239257 | -1.029735 |
| 23 | 6 | 0 | 5.323908  | -3.620740 | -0.727295 |
| 24 | 1 | 0 | 3.614202  | -2.522395 | 0.092236  |
| 25 | 1 | 0 | 3.885721  | -2.277215 | -1.625241 |
| 26 | 1 | 0 | 8.179884  | 0.516406  | -0.350094 |
| 27 | 6 | 0 | 6.544400  | -3.349873 | -1.634121 |
| 28 | 1 | 0 | 8.205922  | -1.930736 | -1.749092 |
| 29 | 1 | 0 | 7.968189  | -2.653947 | -0.159721 |
| 30 | 1 | 0 | 5.673696  | -3.887257 | 0.281715  |
| 31 | 1 | 0 | 4.749344  | -4.476999 | -1.105961 |

|    |   |   |           |           |           |
|----|---|---|-----------|-----------|-----------|
| 32 | 1 | 0 | 6.193310  | -3.049533 | -2.632869 |
| 33 | 1 | 0 | 7.138092  | -4.265366 | -1.761748 |
| 34 | 6 | 0 | -4.629501 | 0.071998  | -0.107335 |
| 35 | 6 | 0 | -5.183139 | -1.107702 | 0.368409  |
| 36 | 6 | 0 | -6.618456 | -1.036086 | 0.583774  |
| 37 | 6 | 0 | -7.147834 | 0.199006  | 0.291611  |
| 38 | 6 | 0 | -5.323908 | -3.620740 | 0.727296  |
| 39 | 1 | 0 | -5.673696 | -3.887257 | -0.281714 |
| 40 | 1 | 0 | -4.749344 | -4.476999 | 1.105962  |
| 41 | 6 | 0 | -6.544400 | -3.349872 | 1.634122  |
| 42 | 1 | 0 | -6.193310 | -3.049533 | 2.632870  |
| 43 | 1 | 0 | -7.138092 | -4.265366 | 1.761749  |
| 44 | 6 | 0 | -4.401818 | -2.380421 | 0.658537  |
| 45 | 1 | 0 | -3.614202 | -2.522395 | -0.092236 |
| 46 | 1 | 0 | -3.885721 | -2.277215 | 1.625242  |
| 47 | 6 | 0 | -7.435548 | -2.239257 | 1.029735  |
| 48 | 1 | 0 | -8.205922 | -1.930735 | 1.749092  |
| 49 | 1 | 0 | -7.968189 | -2.653947 | 0.159722  |
| 50 | 1 | 0 | -8.179884 | 0.516407  | 0.350094  |
| 51 | 6 | 0 | -3.238946 | 0.399792  | -0.397007 |
| 52 | 6 | 0 | -2.683103 | 1.013059  | -1.510103 |
| 53 | 6 | 0 | -1.252851 | 1.227389  | -1.414273 |
| 54 | 6 | 0 | -3.478775 | 1.453331  | -2.730160 |
| 55 | 6 | 0 | -0.695960 | 0.803508  | -0.216261 |
| 56 | 6 | 0 | -0.458735 | 1.848702  | -2.554130 |
| 57 | 6 | 0 | -2.571709 | 1.712897  | -3.954553 |
| 58 | 1 | 0 | -4.249499 | 0.708702  | -2.966799 |
| 59 | 1 | 0 | -4.017349 | 2.383736  | -2.494588 |
| 60 | 6 | 0 | -1.367352 | 2.592972  | -3.558923 |

|    |    |   |           |          |           |
|----|----|---|-----------|----------|-----------|
| 61 | 1  | 0 | 0.312517  | 2.519629 | -2.155025 |
| 62 | 1  | 0 | 0.079342  | 1.055628 | -3.095177 |
| 63 | 1  | 0 | -2.205076 | 0.759186 | -4.363672 |
| 64 | 1  | 0 | -3.160544 | 2.198214 | -4.744761 |
| 65 | 1  | 0 | -1.733857 | 3.531200 | -3.115447 |
| 66 | 1  | 0 | -0.779494 | 2.863420 | -4.446549 |
| 67 | 16 | 0 | -5.912872 | 1.357985 | -0.274653 |
| 68 | 16 | 0 | -1.968015 | 0.079256 | 0.859724  |
| 69 | 16 | 0 | 1.968015  | 0.079255 | -0.859724 |
| 70 | 16 | 0 | 5.912872  | 1.357985 | 0.274653  |

#### 4CHSe

| Center<br>Number | Atomic<br>Number | Atomic<br>Type | Coordinates (Angstroms) |          |           |
|------------------|------------------|----------------|-------------------------|----------|-----------|
|                  |                  |                | X                       | Y        | Z         |
| 1                | 6                | 0              | -3.333804               | 0.260380 | -0.250796 |
| 2                | 6                | 0              | -2.810910               | 1.014239 | -1.289189 |
| 3                | 6                | 0              | -1.375168               | 1.240046 | -1.244913 |
| 4                | 6                | 0              | -0.715605               | 0.704672 | -0.149704 |
| 5                | 6                | 0              | -2.844641               | 2.012160 | -3.637684 |
| 6                | 1                | 0              | -2.501897               | 1.117244 | -4.179283 |
| 7                | 1                | 0              | -3.481094               | 2.583124 | -4.327430 |
| 8                | 6                | 0              | -1.620212               | 2.848341 | -3.211526 |
| 9                | 1                | 0              | -1.960885               | 3.724868 | -2.639450 |
| 10               | 1                | 0              | -1.084818               | 3.226232 | -4.093154 |
| 11               | 6                | 0              | -3.673877               | 1.600727 | -2.400628 |
| 12               | 1                | 0              | -4.462375               | 0.889269 | -2.676623 |

S107

|    |   |   |           |           |           |
|----|---|---|-----------|-----------|-----------|
| 13 | 1 | 0 | -4.192042 | 2.494863  | -2.019540 |
| 14 | 6 | 0 | -0.655895 | 1.996311  | -2.356368 |
| 15 | 1 | 0 | 0.142346  | 2.617480  | -1.930905 |
| 16 | 1 | 0 | -0.156031 | 1.272182  | -3.018957 |
| 17 | 6 | 0 | -4.726957 | -0.091760 | 0.018003  |
| 18 | 6 | 0 | -5.312327 | -1.346228 | 0.077265  |
| 19 | 6 | 0 | -6.726155 | -1.361219 | 0.427377  |
| 20 | 6 | 0 | -4.550158 | -2.640632 | -0.179816 |
| 21 | 6 | 0 | -7.270466 | -0.123626 | 0.678481  |
| 22 | 6 | 0 | -7.536399 | -2.652148 | 0.448744  |
| 23 | 6 | 0 | -5.493717 | -3.822619 | -0.500804 |
| 24 | 1 | 0 | -3.819370 | -2.494101 | -0.985121 |
| 25 | 1 | 0 | -3.965976 | -2.898236 | 0.717872  |
| 26 | 1 | 0 | -8.297817 | 0.096388  | 0.943013  |
| 27 | 6 | 0 | -6.636564 | -3.906672 | 0.533743  |
| 28 | 1 | 0 | -8.252610 | -2.635577 | 1.281066  |
| 29 | 1 | 0 | -8.132232 | -2.714289 | -0.475540 |
| 30 | 1 | 0 | -5.923508 | -3.700613 | -1.506794 |
| 31 | 1 | 0 | -4.914445 | -4.755997 | -0.508375 |
| 32 | 1 | 0 | -6.205923 | -3.994947 | 1.542744  |
| 33 | 1 | 0 | -7.245264 | -4.805014 | 0.361979  |
| 34 | 6 | 0 | 4.726957  | -0.091760 | -0.018003 |
| 35 | 6 | 0 | 5.312327  | -1.346228 | -0.077265 |
| 36 | 6 | 0 | 6.726155  | -1.361219 | -0.427378 |
| 37 | 6 | 0 | 7.270465  | -0.123626 | -0.678482 |
| 38 | 6 | 0 | 5.493717  | -3.822619 | 0.500802  |
| 39 | 1 | 0 | 5.923508  | -3.700613 | 1.506793  |
| 40 | 1 | 0 | 4.914445  | -4.755997 | 0.508373  |
| 41 | 6 | 0 | 6.636564  | -3.906672 | -0.533744 |

|    |    |   |           |           |           |
|----|----|---|-----------|-----------|-----------|
| 42 | 1  | 0 | 6.205923  | -3.994947 | -1.542746 |
| 43 | 1  | 0 | 7.245264  | -4.805014 | -0.361981 |
| 44 | 6  | 0 | 4.550158  | -2.640632 | 0.179815  |
| 45 | 1  | 0 | 3.819370  | -2.494101 | 0.985121  |
| 46 | 1  | 0 | 3.965976  | -2.898235 | -0.717873 |
| 47 | 6  | 0 | 7.536399  | -2.652147 | -0.448745 |
| 48 | 1  | 0 | 8.252610  | -2.635576 | -1.281067 |
| 49 | 1  | 0 | 8.132232  | -2.714289 | 0.475539  |
| 50 | 1  | 0 | 8.297817  | 0.096389  | -0.943013 |
| 51 | 6  | 0 | 3.333804  | 0.260380  | 0.250796  |
| 52 | 6  | 0 | 2.810910  | 1.014238  | 1.289190  |
| 53 | 6  | 0 | 1.375168  | 1.240045  | 1.244914  |
| 54 | 6  | 0 | 3.673877  | 1.600725  | 2.400629  |
| 55 | 6  | 0 | 0.715605  | 0.704672  | 0.149704  |
| 56 | 6  | 0 | 0.655895  | 1.996309  | 2.356370  |
| 57 | 6  | 0 | 2.844641  | 2.012157  | 3.637685  |
| 58 | 1  | 0 | 4.462375  | 0.889267  | 2.676624  |
| 59 | 1  | 0 | 4.192042  | 2.494862  | 2.019542  |
| 60 | 6  | 0 | 1.620212  | 2.848338  | 3.211528  |
| 61 | 1  | 0 | -0.142346 | 2.617478  | 1.930907  |
| 62 | 1  | 0 | 0.156031  | 1.272179  | 3.018958  |
| 63 | 1  | 0 | 2.501897  | 1.117241  | 4.179284  |
| 64 | 1  | 0 | 3.481094  | 2.583120  | 4.327432  |
| 65 | 1  | 0 | 1.960885  | 3.724866  | 2.639452  |
| 66 | 1  | 0 | 1.084819  | 3.226228  | 4.093156  |
| 67 | 34 | 0 | 6.011977  | 1.288285  | -0.480967 |
| 68 | 34 | 0 | 1.948639  | -0.241657 | -1.000219 |
| 69 | 34 | 0 | -1.948639 | -0.241658 | 1.000219  |
| 70 | 34 | 0 | -6.011977 | 1.288285  | 0.480967  |

-----

## 4CHTe

-----

| Center<br>Number | Atomic<br>Number | Atomic<br>Type | Coordinates (Angstroms) |           |           |
|------------------|------------------|----------------|-------------------------|-----------|-----------|
|                  |                  |                | X                       | Y         | Z         |
| 1                | 6                | 0              | 3.464486                | -0.171081 | -0.143685 |
| 2                | 6                | 0              | 2.910045                | -1.079404 | -1.030116 |
| 3                | 6                | 0              | 1.458245                | -1.254558 | -1.012506 |
| 4                | 6                | 0              | 0.728009                | -0.523501 | -0.090147 |
| 5                | 6                | 0              | 3.006516                | -2.523767 | -3.145226 |
| 6                | 1                | 0              | 2.731015                | -1.740484 | -3.868014 |
| 7                | 1                | 0              | 3.651341                | -3.238845 | -3.674350 |
| 8                | 6                | 0              | 1.727406                | -3.217834 | -2.637240 |
| 9                | 1                | 0              | 2.000482                | -3.982461 | -1.893873 |
| 10               | 1                | 0              | 1.214957                | -3.735609 | -3.459667 |
| 11               | 6                | 0              | 3.789591                | -1.908032 | -1.965299 |
| 12               | 1                | 0              | 4.624251                | -1.296630 | -2.329110 |
| 13               | 1                | 0              | 4.247250                | -2.725935 | -1.385342 |
| 14               | 6                | 0              | 0.767661                | -2.183659 | -2.009776 |
| 15               | 1                | 0              | -0.080717               | -2.682956 | -1.526029 |
| 16               | 1                | 0              | 0.335091                | -1.573505 | -2.819401 |
| 17               | 6                | 0              | 4.885368                | 0.154521  | 0.019706  |
| 18               | 6                | 0              | 5.585802                | 1.182094  | -0.590952 |
| 19               | 6                | 0              | 7.003857                | 1.326406  | -0.259162 |
| 20               | 6                | 0              | 4.897241                | 2.168032  | -1.533023 |
| 21               | 6                | 0              | 7.522802                | 0.443273  | 0.659187  |
| 22               | 6                | 0              | 7.872378                | 2.381309  | -0.942666 |

S110

|    |   |   |           |           |           |
|----|---|---|-----------|-----------|-----------|
| 23 | 6 | 0 | 5.892077  | 2.962372  | -2.408833 |
| 24 | 1 | 0 | 4.165857  | 1.640595  | -2.157706 |
| 25 | 1 | 0 | 4.315538  | 2.882593  | -0.928308 |
| 26 | 1 | 0 | 8.553535  | 0.432852  | 0.996874  |
| 27 | 6 | 0 | 7.040983  | 3.532344  | -1.551712 |
| 28 | 1 | 0 | 8.612405  | 2.773122  | -0.232471 |
| 29 | 1 | 0 | 8.441176  | 1.900007  | -1.754177 |
| 30 | 1 | 0 | 6.313722  | 2.310461  | -3.189298 |
| 31 | 1 | 0 | 5.355081  | 3.772340  | -2.921314 |
| 32 | 1 | 0 | 6.621976  | 4.161881  | -0.752118 |
| 33 | 1 | 0 | 7.694219  | 4.172958  | -2.160161 |
| 34 | 6 | 0 | -4.885368 | 0.154521  | -0.019706 |
| 35 | 6 | 0 | -5.585801 | 1.182094  | 0.590952  |
| 36 | 6 | 0 | -7.003857 | 1.326406  | 0.259162  |
| 37 | 6 | 0 | -7.522802 | 0.443273  | -0.659186 |
| 38 | 6 | 0 | -5.892076 | 2.962373  | 2.408832  |
| 39 | 1 | 0 | -6.313722 | 2.310462  | 3.189298  |
| 40 | 1 | 0 | -5.355081 | 3.772341  | 2.921313  |
| 41 | 6 | 0 | -7.040983 | 3.532345  | 1.551711  |
| 42 | 1 | 0 | -6.621976 | 4.161882  | 0.752117  |
| 43 | 1 | 0 | -7.694218 | 4.172958  | 2.160161  |
| 44 | 6 | 0 | -4.897240 | 2.168032  | 1.533023  |
| 45 | 1 | 0 | -4.165857 | 1.640595  | 2.157706  |
| 46 | 1 | 0 | -4.315538 | 2.882593  | 0.928307  |
| 47 | 6 | 0 | -7.872377 | 2.381309  | 0.942666  |
| 48 | 1 | 0 | -8.612405 | 2.773122  | 0.232471  |
| 49 | 1 | 0 | -8.441176 | 1.900008  | 1.754177  |
| 50 | 1 | 0 | -8.553535 | 0.432852  | -0.996873 |
| 51 | 6 | 0 | -3.464486 | -0.171081 | 0.143685  |

|    |    |   |           |           |           |
|----|----|---|-----------|-----------|-----------|
| 52 | 6  | 0 | -2.910045 | -1.079404 | 1.030117  |
| 53 | 6  | 0 | -1.458245 | -1.254558 | 1.012506  |
| 54 | 6  | 0 | -3.789591 | -1.908032 | 1.965299  |
| 55 | 6  | 0 | -0.728009 | -0.523501 | 0.090147  |
| 56 | 6  | 0 | -0.767660 | -2.183659 | 2.009776  |
| 57 | 6  | 0 | -3.006515 | -2.523767 | 3.145226  |
| 58 | 1  | 0 | -4.624251 | -1.296629 | 2.329110  |
| 59 | 1  | 0 | -4.247250 | -2.725935 | 1.385342  |
| 60 | 6  | 0 | -1.727406 | -3.217833 | 2.637241  |
| 61 | 1  | 0 | 0.080717  | -2.682955 | 1.526030  |
| 62 | 1  | 0 | -0.335091 | -1.573504 | 2.819401  |
| 63 | 1  | 0 | -2.731015 | -1.740483 | 3.868014  |
| 64 | 1  | 0 | -3.651341 | -3.238845 | 3.674350  |
| 65 | 1  | 0 | -2.000482 | -3.982461 | 1.893874  |
| 66 | 1  | 0 | -1.214957 | -3.735608 | 3.459668  |
| 67 | 52 | 0 | -6.128057 | -0.927857 | -1.342786 |
| 68 | 52 | 0 | -1.982034 | 0.720136  | -1.058581 |
| 69 | 52 | 0 | 1.982034  | 0.720136  | 1.058581  |
| 70 | 52 | 0 | 6.128057  | -0.927857 | 1.342786  |

## Optimization of 5CHX

### 5CHO

| Center<br>Number | Atomic<br>Number | Atomic<br>Type | Coordinates (Angstroms) |          |           |
|------------------|------------------|----------------|-------------------------|----------|-----------|
|                  |                  |                | X                       | Y        | Z         |
| 1                | 6                | 0              | 4.672315                | 0.725118 | -0.188790 |

S112



|    |   |   |          |           |           |
|----|---|---|----------|-----------|-----------|
| 2  | 6 | 0 | 4.251256 | 2.032947  | -0.376628 |
| 3  | 6 | 0 | 2.808557 | 2.022709  | -0.375050 |
| 4  | 6 | 0 | 2.405338 | 0.708952  | -0.180214 |
| 5  | 6 | 0 | 4.186766 | 4.549342  | -0.385181 |
| 6  | 1 | 0 | 3.989509 | 4.700863  | 0.687192  |
| 7  | 1 | 0 | 4.734738 | 5.432779  | -0.739931 |
| 8  | 6 | 0 | 2.838059 | 4.421758  | -1.132304 |
| 9  | 1 | 0 | 3.035008 | 4.237160  | -2.199436 |
| 10 | 1 | 0 | 2.277307 | 5.364107  | -1.066196 |
| 11 | 6 | 0 | 5.065983 | 3.288298  | -0.580808 |
| 12 | 1 | 0 | 5.927438 | 3.303347  | 0.097347  |
| 13 | 1 | 0 | 5.485490 | 3.291267  | -1.598456 |
| 14 | 6 | 0 | 1.976995 | 3.270702  | -0.553943 |
| 15 | 1 | 0 | 1.112560 | 3.067585  | -1.197367 |
| 16 | 1 | 0 | 1.564327 | 3.580998  | 0.418453  |
| 17 | 8 | 0 | 3.545908 | -0.114443 | -0.063189 |
| 18 | 6 | 0 | 5.960504 | 0.094586  | -0.104886 |
| 19 | 6 | 0 | 6.394411 | -1.189329 | 0.186533  |
| 20 | 8 | 0 | 7.076776 | 0.914151  | -0.370573 |
| 21 | 6 | 0 | 7.841986 | -1.175711 | 0.097841  |
| 22 | 6 | 0 | 5.603961 | -2.433441 | 0.517057  |
| 23 | 6 | 0 | 8.214371 | 0.103707  | -0.238149 |
| 24 | 6 | 0 | 8.693321 | -2.393647 | 0.376090  |
| 25 | 6 | 0 | 6.525123 | -3.523854 | 1.121761  |
| 26 | 1 | 0 | 4.780221 | -2.197289 | 1.201226  |
| 27 | 1 | 0 | 5.134300 | -2.825058 | -0.398694 |
| 28 | 1 | 0 | 9.158902 | 0.593111  | -0.411226 |
| 29 | 6 | 0 | 7.833897 | -3.682818 | 0.311029  |
| 30 | 1 | 0 | 9.531562 | -2.455661 | -0.330790 |

|    |   |   |           |           |           |
|----|---|---|-----------|-----------|-----------|
| 31 | 1 | 0 | 9.135230  | -2.314389 | 1.381306  |
| 32 | 1 | 0 | 6.777964  | -3.260980 | 2.160390  |
| 33 | 1 | 0 | 5.983664  | -4.479067 | 1.154420  |
| 34 | 1 | 0 | 7.584089  | -3.909747 | -0.736486 |
| 35 | 1 | 0 | 8.417091  | -4.530261 | 0.696143  |
| 36 | 6 | 0 | -2.405349 | 0.708950  | 0.180267  |
| 37 | 6 | 0 | -2.808573 | 2.022704  | 0.375114  |
| 38 | 6 | 0 | -4.251272 | 2.032941  | 0.376647  |
| 39 | 6 | 0 | -4.672323 | 0.725114  | 0.188778  |
| 40 | 6 | 0 | -2.838101 | 4.421757  | 1.132354  |
| 41 | 1 | 0 | -3.035085 | 4.237163  | 2.199480  |
| 42 | 1 | 0 | -2.277347 | 5.364106  | 1.066260  |
| 43 | 6 | 0 | -4.186783 | 4.549338  | 0.385186  |
| 44 | 1 | 0 | -3.989490 | 4.700853  | -0.687181 |
| 45 | 1 | 0 | -4.734767 | 5.432777  | 0.739915  |
| 46 | 6 | 0 | -1.977018 | 3.270698  | 0.554026  |
| 47 | 1 | 0 | -1.112603 | 3.067585  | 1.197478  |
| 48 | 1 | 0 | -1.564320 | 3.580989  | -0.418359 |
| 49 | 6 | 0 | -5.066007 | 3.288295  | 0.580787  |
| 50 | 1 | 0 | -5.927435 | 3.303340  | -0.097401 |
| 51 | 1 | 0 | -5.485551 | 3.291271  | 1.598420  |
| 52 | 8 | 0 | -3.545912 | -0.114456 | 0.063269  |
| 53 | 6 | 0 | -1.131119 | 0.058855  | 0.083949  |
| 54 | 6 | 0 | -0.718736 | -1.266435 | 0.055335  |
| 55 | 8 | 0 | -0.000006 | 0.898330  | 0.000019  |
| 56 | 6 | 0 | 0.718727  | -1.266435 | -0.055244 |
| 57 | 6 | 0 | -1.540440 | -2.532610 | 0.107540  |
| 58 | 6 | 0 | 1.131109  | 0.058855  | -0.083887 |
| 59 | 6 | 0 | 1.540432  | -2.532612 | -0.107387 |

|    |   |   |           |           |           |
|----|---|---|-----------|-----------|-----------|
| 60 | 6 | 0 | -0.642818 | -3.753509 | 0.430520  |
| 61 | 1 | 0 | -2.348675 | -2.436597 | 0.842463  |
| 62 | 1 | 0 | -2.032323 | -2.692156 | -0.864376 |
| 63 | 6 | 0 | 0.642814  | -3.753519 | -0.430347 |
| 64 | 1 | 0 | 2.348687  | -2.436626 | -0.842288 |
| 65 | 1 | 0 | 2.032282  | -2.692127 | 0.864553  |
| 66 | 1 | 0 | -0.361743 | -3.735726 | 1.494685  |
| 67 | 1 | 0 | -1.211631 | -4.678224 | 0.262643  |
| 68 | 1 | 0 | 0.361744  | -3.735756 | -1.494514 |
| 69 | 1 | 0 | 1.211627  | -4.678229 | -0.262447 |
| 70 | 6 | 0 | -8.214382 | 0.103707  | 0.237920  |
| 71 | 6 | 0 | -7.841973 | -1.175725 | -0.097993 |
| 72 | 8 | 0 | -7.076795 | 0.914151  | 0.370408  |
| 73 | 6 | 0 | -6.394391 | -1.189350 | -0.186568 |
| 74 | 6 | 0 | -8.693288 | -2.393662 | -0.376283 |
| 75 | 6 | 0 | -5.960504 | 0.094579  | 0.104815  |
| 76 | 6 | 0 | -5.603916 | -2.433467 | -0.517020 |
| 77 | 6 | 0 | -7.833876 | -3.682833 | -0.311087 |
| 78 | 1 | 0 | -9.531600 | -2.455645 | 0.330513  |
| 79 | 1 | 0 | -9.135092 | -2.314438 | -1.381549 |
| 80 | 6 | 0 | -6.525041 | -3.523909 | -1.121730 |
| 81 | 1 | 0 | -4.780155 | -2.197325 | -1.201172 |
| 82 | 1 | 0 | -5.134276 | -2.825049 | 0.398754  |
| 83 | 1 | 0 | -7.584152 | -3.909712 | 0.736458  |
| 84 | 1 | 0 | -8.417042 | -4.530292 | -0.696210 |
| 85 | 1 | 0 | -6.777811 | -3.261085 | -2.160389 |
| 86 | 1 | 0 | -5.983580 | -4.479124 | -1.154307 |
| 87 | 1 | 0 | -9.158925 | 0.593117  | 0.410914  |

**5CHS**

| Center | Atomic | Atomic | Coordinates (Angstroms) |           |           |
|--------|--------|--------|-------------------------|-----------|-----------|
| Number | Number | Type   | X                       | Y         | Z         |
| -----  |        |        |                         |           |           |
| 1      | 6      | 0      | 5.163065                | -0.699595 | -0.203417 |
| 2      | 6      | 0      | 4.494321                | -1.626681 | -0.989518 |
| 3      | 6      | 0      | 3.054992                | -1.616570 | -0.820216 |
| 4      | 6      | 0      | 2.601181                | -0.697881 | 0.115793  |
| 5      | 6      | 0      | 4.198858                | -3.203139 | -2.966012 |
| 6      | 1      | 0      | 3.920517                | -2.447622 | -3.716396 |
| 7      | 1      | 0      | 4.695797                | -4.023033 | -3.502214 |
| 8      | 6      | 0      | 2.924739                | -3.711790 | -2.259598 |
| 9      | 1      | 0      | 3.206246                | -4.439600 | -1.483505 |
| 10     | 1      | 0      | 2.271946                | -4.234975 | -2.971483 |
| 11     | 6      | 0      | 5.182098                | -2.596700 | -1.939110 |
| 12     | 1      | 0      | 6.017955                | -2.098779 | -2.446921 |
| 13     | 1      | 0      | 5.626203                | -3.418916 | -1.357760 |
| 14     | 6      | 0      | 2.148395                | -2.533842 | -1.628170 |
| 15     | 1      | 0      | 1.326575                | -2.900870 | -1.000355 |
| 16     | 1      | 0      | 1.677277                | -1.956165 | -2.437841 |
| 17     | 6      | 0      | 6.592427                | -0.452002 | -0.061021 |
| 18     | 6      | 0      | 7.291378                | 0.746610  | -0.065674 |
| 19     | 6      | 0      | 8.718726                | 0.593138  | 0.159523  |
| 20     | 6      | 0      | 6.666722                | 2.117861  | -0.275690 |
| 21     | 6      | 0      | 9.097818                | -0.714309 | 0.354127  |
| 22     | 6      | 0      | 9.680648                | 1.770897  | 0.118574  |
| 23     | 6      | 0      | 7.719927                | 3.176558  | -0.679736 |
| S116   |        |        |                         |           |           |

|    |   |   |           |           |           |
|----|---|---|-----------|-----------|-----------|
| 24 | 1 | 0 | 5.866231  | 2.060575  | -1.024066 |
| 25 | 1 | 0 | 6.186461  | 2.444957  | 0.659118  |
| 26 | 1 | 0 | 10.091093 | -1.105237 | 0.526916  |
| 27 | 6 | 0 | 8.943426  | 3.123244  | 0.261228  |
| 28 | 1 | 0 | 10.444869 | 1.665452  | 0.900223  |
| 29 | 1 | 0 | 10.215121 | 1.764622  | -0.844189 |
| 30 | 1 | 0 | 8.050834  | 3.003542  | -1.715130 |
| 31 | 1 | 0 | 7.258998  | 4.173235  | -0.650852 |
| 32 | 1 | 0 | 8.607299  | 3.261558  | 1.299903  |
| 33 | 1 | 0 | 9.637983  | 3.943534  | 0.034103  |
| 34 | 6 | 0 | -2.601180 | 0.697881  | 0.115794  |
| 35 | 6 | 0 | -3.054992 | 1.616572  | -0.820213 |
| 36 | 6 | 0 | -4.494320 | 1.626683  | -0.989515 |
| 37 | 6 | 0 | -5.163064 | 0.699595  | -0.203416 |
| 38 | 6 | 0 | -2.924739 | 3.711796  | -2.259589 |
| 39 | 1 | 0 | -3.206246 | 4.439604  | -1.483494 |
| 40 | 1 | 0 | -2.271946 | 4.234983  | -2.971473 |
| 41 | 6 | 0 | -4.198857 | 3.203146  | -2.966005 |
| 42 | 1 | 0 | -3.920516 | 2.447631  | -3.716390 |
| 43 | 1 | 0 | -4.695797 | 4.023042  | -3.502204 |
| 44 | 6 | 0 | -2.148395 | 2.533846  | -1.628164 |
| 45 | 1 | 0 | -1.326575 | 2.900873  | -1.000347 |
| 46 | 1 | 0 | -1.677276 | 1.956171  | -2.437836 |
| 47 | 6 | 0 | -5.182098 | 2.596705  | -1.939104 |
| 48 | 1 | 0 | -6.017955 | 2.098785  | -2.446916 |
| 49 | 1 | 0 | -5.626202 | 3.418920  | -1.357752 |
| 50 | 6 | 0 | -1.238636 | 0.364384  | 0.511144  |
| 51 | 6 | 0 | -0.697081 | 0.197722  | 1.778052  |
| 52 | 6 | 0 | 0.697081  | -0.197727 | 1.778051  |

|    |   |   |            |           |           |
|----|---|---|------------|-----------|-----------|
| 53 | 6 | 0 | -1.475167  | 0.386623  | 3.072293  |
| 54 | 6 | 0 | 1.238637   | -0.364386 | 0.511144  |
| 55 | 6 | 0 | 1.475166   | -0.386632 | 3.072292  |
| 56 | 6 | 0 | -0.543197  | 0.547881  | 4.294698  |
| 57 | 1 | 0 | -2.153170  | 1.244905  | 2.983350  |
| 58 | 1 | 0 | -2.117289  | -0.491275 | 3.240142  |
| 59 | 6 | 0 | 0.543195   | -0.547894 | 4.294697  |
| 60 | 1 | 0 | 2.153169   | -1.244915 | 2.983347  |
| 61 | 1 | 0 | 2.117288   | 0.491264  | 3.240144  |
| 62 | 1 | 0 | -0.060912  | 1.537000  | 4.275909  |
| 63 | 1 | 0 | -1.141487  | 0.497836  | 5.214547  |
| 64 | 1 | 0 | 0.060910   | -1.537014 | 4.275904  |
| 65 | 1 | 0 | 1.141485   | -0.497852 | 5.214546  |
| 66 | 6 | 0 | -9.097817  | 0.714309  | 0.354127  |
| 67 | 6 | 0 | -8.718726  | -0.593137 | 0.159522  |
| 68 | 6 | 0 | -7.291378  | -0.746610 | -0.065676 |
| 69 | 6 | 0 | -9.680648  | -1.770896 | 0.118571  |
| 70 | 6 | 0 | -6.592427  | 0.452002  | -0.061021 |
| 71 | 6 | 0 | -6.666723  | -2.117860 | -0.275694 |
| 72 | 6 | 0 | -8.943426  | -3.123244 | 0.261223  |
| 73 | 1 | 0 | -10.444869 | -1.665453 | 0.900220  |
| 74 | 1 | 0 | -10.215122 | -1.764620 | -0.844192 |
| 75 | 6 | 0 | -7.719928  | -3.176557 | -0.679741 |
| 76 | 1 | 0 | -5.866231  | -2.060573 | -1.024069 |
| 77 | 1 | 0 | -6.186462  | -2.444958 | 0.659113  |
| 78 | 1 | 0 | -8.607299  | -3.261559 | 1.299898  |
| 79 | 1 | 0 | -9.637983  | -3.943533 | 0.034097  |
| 80 | 1 | 0 | -8.050835  | -3.003538 | -1.715136 |
| 81 | 1 | 0 | -7.258999  | -4.173234 | -0.650860 |

|    |    |   |            |           |           |
|----|----|---|------------|-----------|-----------|
| 82 | 1  | 0 | -10.091093 | 1.105237  | 0.526917  |
| 83 | 16 | 0 | -7.720757  | 1.847759  | 0.267543  |
| 84 | 16 | 0 | -3.991785  | -0.231267 | 0.825315  |
| 85 | 16 | 0 | 0.000000   | 0.000001  | -0.766610 |
| 86 | 16 | 0 | 3.991785   | 0.231264  | 0.825316  |
| 87 | 16 | 0 | 7.720757   | -1.847759 | 0.267541  |

## 5CHSe

| Center<br>Number | Atomic<br>Number | Atomic<br>Type | Coordinates (Angstroms) |           |           |
|------------------|------------------|----------------|-------------------------|-----------|-----------|
|                  |                  |                | X                       | Y         | Z         |
| 1                | 6                | 0              | 5.300430                | -0.470349 | -0.142812 |
| 2                | 6                | 0              | 4.663389                | -1.624510 | -0.568971 |
| 3                | 6                | 0              | 3.230077                | -1.679227 | -0.329810 |
| 4                | 6                | 0              | 2.688325                | -0.586818 | 0.328332  |
| 5                | 6                | 0              | 4.456431                | -3.736569 | -1.985983 |
| 6                | 1                | 0              | 4.099615                | -3.255856 | -2.909727 |
| 7                | 1                | 0              | 5.009544                | -4.637805 | -2.283765 |
| 8                | 6                | 0              | 3.244849                | -4.109898 | -1.106644 |
| 9                | 1                | 0              | 3.602967                | -4.559031 | -0.167675 |
| 10               | 1                | 0              | 2.621624                | -4.863005 | -1.607823 |
| 11               | 6                | 0              | 5.404796                | -2.784832 | -1.222902 |
| 12               | 1                | 0              | 6.190576                | -2.400654 | -1.885532 |
| 13               | 1                | 0              | 5.922776                | -3.365294 | -0.443161 |
| 14               | 6                | 0              | 2.389709                | -2.858688 | -0.805873 |
| 15               | 1                | 0              | 1.610413                | -3.085611 | -0.067404 |
| 16               | 1                | 0              | 1.859457                | -2.572862 | -1.728116 |

|    |   |   |           |           |           |
|----|---|---|-----------|-----------|-----------|
| 17 | 6 | 0 | 6.722844  | -0.135808 | -0.189417 |
| 18 | 6 | 0 | 7.353536  | 0.891421  | -0.872389 |
| 19 | 6 | 0 | 8.791994  | 0.990208  | -0.665134 |
| 20 | 6 | 0 | 6.616389  | 1.879115  | -1.768706 |
| 21 | 6 | 0 | 9.313215  | 0.062763  | 0.206150  |
| 22 | 6 | 0 | 9.644463  | 2.009791  | -1.411706 |
| 23 | 6 | 0 | 7.568407  | 2.607179  | -2.745342 |
| 24 | 1 | 0 | 5.813947  | 1.366680  | -2.314192 |
| 25 | 1 | 0 | 6.121358  | 2.635530  | -1.139210 |
| 26 | 1 | 0 | 10.351355 | -0.051104 | 0.494510  |
| 27 | 6 | 0 | 8.798380  | 3.164219  | -1.996801 |
| 28 | 1 | 0 | 10.428024 | 2.404082  | -0.750971 |
| 29 | 1 | 0 | 10.161176 | 1.502712  | -2.241792 |
| 30 | 1 | 0 | 7.905375  | 1.914348  | -3.531513 |
| 31 | 1 | 0 | 7.022862  | 3.420090  | -3.243702 |
| 32 | 1 | 0 | 8.459536  | 3.830983  | -1.189379 |
| 33 | 1 | 0 | 9.420272  | 3.765952  | -2.673703 |
| 34 | 6 | 0 | -2.688325 | 0.586816  | 0.328334  |
| 35 | 6 | 0 | -3.230077 | 1.679227  | -0.329805 |
| 36 | 6 | 0 | -4.663388 | 1.624512  | -0.568966 |
| 37 | 6 | 0 | -5.300430 | 0.470350  | -0.142811 |
| 38 | 6 | 0 | -3.244847 | 4.109901  | -1.106631 |
| 39 | 1 | 0 | -3.602966 | 4.559031  | -0.167660 |
| 40 | 1 | 0 | -2.621622 | 4.863009  | -1.607807 |
| 41 | 6 | 0 | -4.456430 | 3.736576  | -1.985971 |
| 42 | 1 | 0 | -4.099613 | 3.255865  | -2.909716 |
| 43 | 1 | 0 | -5.009542 | 4.637813  | -2.283751 |
| 44 | 6 | 0 | -2.389708 | 2.858690  | -0.805863 |
| 45 | 1 | 0 | -1.610412 | 3.085610  | -0.067394 |



|    |   |   |            |           |           |
|----|---|---|------------|-----------|-----------|
| 46 | 1 | 0 | -1.859456  | 2.572867  | -1.728107 |
| 47 | 6 | 0 | -5.404795  | 2.784837  | -1.222893 |
| 48 | 1 | 0 | -6.190575  | 2.400661  | -1.885525 |
| 49 | 1 | 0 | -5.922775  | 3.365296  | -0.443150 |
| 50 | 6 | 0 | -1.290008  | 0.317774  | 0.661147  |
| 51 | 6 | 0 | -0.708514  | 0.163456  | 1.909255  |
| 52 | 6 | 0 | 0.708514   | -0.163465 | 1.909255  |
| 53 | 6 | 0 | -1.493190  | 0.296174  | 3.209571  |
| 54 | 6 | 0 | 1.290008   | -0.317777 | 0.661145  |
| 55 | 6 | 0 | 1.493190   | -0.296189 | 3.209570  |
| 56 | 6 | 0 | -0.575563  | 0.513525  | 4.433478  |
| 57 | 1 | 0 | -2.227998  | 1.106450  | 3.122479  |
| 58 | 1 | 0 | -2.075226  | -0.624559 | 3.373370  |
| 59 | 6 | 0 | 0.575563   | -0.513545 | 4.433476  |
| 60 | 1 | 0 | 2.227997   | -1.106464 | 3.122474  |
| 61 | 1 | 0 | 2.075226   | 0.624544  | 3.373373  |
| 62 | 1 | 0 | -0.154340  | 1.530356  | 4.415829  |
| 63 | 1 | 0 | -1.170733  | 0.426378  | 5.352650  |
| 64 | 1 | 0 | 0.154340   | -1.530376 | 4.415823  |
| 65 | 1 | 0 | 1.170733   | -0.426402 | 5.352648  |
| 66 | 6 | 0 | -9.313215  | -0.062761 | 0.206148  |
| 67 | 6 | 0 | -8.791995  | -0.990205 | -0.665136 |
| 68 | 6 | 0 | -7.353537  | -0.891418 | -0.872392 |
| 69 | 6 | 0 | -9.644464  | -2.009786 | -1.411710 |
| 70 | 6 | 0 | -6.722844  | 0.135810  | -0.189418 |
| 71 | 6 | 0 | -6.616390  | -1.879112 | -1.768709 |
| 72 | 6 | 0 | -8.798381  | -3.164213 | -1.996807 |
| 73 | 1 | 0 | -10.428025 | -2.404078 | -0.750976 |
| 74 | 1 | 0 | -10.161176 | -1.502706 | -2.241796 |

|    |    |   |            |           |           |
|----|----|---|------------|-----------|-----------|
| 75 | 6  | 0 | -7.568408  | -2.607173 | -2.745347 |
| 76 | 1  | 0 | -5.813947  | -1.366676 | -2.314194 |
| 77 | 1  | 0 | -6.121360  | -2.635527 | -1.139215 |
| 78 | 1  | 0 | -8.459537  | -3.830979 | -1.189386 |
| 79 | 1  | 0 | -9.420273  | -3.765945 | -2.673710 |
| 80 | 1  | 0 | -7.905375  | -1.914340 | -3.531517 |
| 81 | 1  | 0 | -7.022863  | -3.420083 | -3.243708 |
| 82 | 1  | 0 | -10.351355 | 0.051107  | 0.494508  |
| 83 | 34 | 0 | -7.994760  | 1.120445  | 0.897923  |
| 84 | 34 | 0 | -4.048328  | -0.734835 | 0.703371  |
| 85 | 34 | 0 | 0.000000   | 0.000002  | -0.743410 |
| 86 | 34 | 0 | 4.048328   | 0.734833  | 0.703374  |
| 87 | 34 | 0 | 7.994760   | -1.120444 | 0.897922  |

# 5CHTe

| Center | Atomic | Atomic | Coordinates (Angstroms) |           |           |
|--------|--------|--------|-------------------------|-----------|-----------|
| Number | Number | Type   | X                       | Y         | Z         |
| 1      | 6      | 0      | 5.515857                | 0.094674  | -0.286771 |
| 2      | 6      | 0      | 4.910817                | 0.057868  | -1.532052 |
| 3      | 6      | 0      | 3.468868                | -0.179731 | -1.586002 |
| 4      | 6      | 0      | 2.800389                | -0.383687 | -0.390235 |
| 5      | 6      | 0      | 4.867189                | 0.578113  | -4.040870 |
| 6      | 1      | 0      | 4.521070                | 1.620393  | -3.965189 |
| 7      | 1      | 0      | 5.481370                | 0.507089  | -4.949087 |
| 8      | 6      | 0      | 3.645325                | -0.356698 | -4.136764 |
| 9      | 1      | 0      | 3.990775                | -1.400791 | -4.185484 |

|    |   |   |           |           |           |
|----|---|---|-----------|-----------|-----------|
| 10 | 1 | 0 | 3.078964  | -0.160816 | -5.057593 |
| 11 | 6 | 0 | 5.729206  | 0.212731  | -2.812945 |
| 12 | 1 | 0 | 6.522567  | 0.954286  | -2.659953 |
| 13 | 1 | 0 | 6.244289  | -0.739728 | -3.018734 |
| 14 | 6 | 0 | 2.719010  | -0.158632 | -2.917165 |
| 15 | 1 | 0 | 1.922483  | -0.912597 | -2.907133 |
| 16 | 1 | 0 | 2.210511  | 0.813947  | -3.019453 |
| 17 | 6 | 0 | 6.938490  | 0.306088  | 0.001284  |
| 18 | 6 | 0 | 7.571081  | 1.509959  | 0.265544  |
| 19 | 6 | 0 | 9.007645  | 1.474077  | 0.542478  |
| 20 | 6 | 0 | 6.794182  | 2.823929  | 0.325576  |
| 21 | 6 | 0 | 9.611590  | 0.238030  | 0.547130  |
| 22 | 6 | 0 | 9.801802  | 2.759769  | 0.767220  |
| 23 | 6 | 0 | 7.703671  | 4.069264  | 0.226693  |
| 24 | 1 | 0 | 6.026571  | 2.841488  | -0.457875 |
| 25 | 1 | 0 | 6.247976  | 2.864389  | 1.281965  |
| 26 | 1 | 0 | 10.665268 | 0.062572  | 0.735683  |
| 27 | 6 | 0 | 8.905655  | 3.946641  | 1.185819  |
| 28 | 1 | 0 | 10.588143 | 2.587380  | 1.513862  |
| 29 | 1 | 0 | 10.313721 | 3.028287  | -0.170643 |
| 30 | 1 | 0 | 8.074844  | 4.186209  | -0.803102 |
| 31 | 1 | 0 | 7.114128  | 4.966444  | 0.460297  |
| 32 | 1 | 0 | 8.539246  | 3.801274  | 2.213364  |
| 33 | 1 | 0 | 9.498291  | 4.871883  | 1.180683  |
| 34 | 6 | 0 | -2.800391 | -0.383730 | 0.390206  |
| 35 | 6 | 0 | -3.468855 | -0.179784 | 1.585984  |
| 36 | 6 | 0 | -4.910803 | 0.057822  | 1.532054  |
| 37 | 6 | 0 | -5.515858 | 0.094644  | 0.286781  |
| 38 | 6 | 0 | -3.645273 | -0.356727 | 4.136749  |

|    |   |   |           |           |           |
|----|---|---|-----------|-----------|-----------|
| 39 | 1 | 0 | -3.990727 | -1.400818 | 4.185481  |
| 40 | 1 | 0 | -3.078897 | -0.160842 | 5.057568  |
| 41 | 6 | 0 | -4.867133 | 0.578091  | 4.040867  |
| 42 | 1 | 0 | -4.521010 | 1.620368  | 3.965175  |
| 43 | 1 | 0 | -5.481301 | 0.507076  | 4.949094  |
| 44 | 6 | 0 | -2.718976 | -0.158673 | 2.917135  |
| 45 | 1 | 0 | -1.922449 | -0.912638 | 2.907097  |
| 46 | 1 | 0 | -2.210476 | 0.813907  | 3.019406  |
| 47 | 6 | 0 | -5.729171 | 0.212706  | 2.812958  |
| 48 | 1 | 0 | -6.522526 | 0.954269  | 2.659970  |
| 49 | 1 | 0 | -6.244262 | -0.739745 | 3.018763  |
| 50 | 6 | 0 | -1.364405 | -0.621154 | 0.205851  |
| 51 | 6 | 0 | -0.724221 | -1.844739 | 0.101003  |
| 52 | 6 | 0 | 0.724237  | -1.844729 | -0.101063 |
| 53 | 6 | 0 | -1.510022 | -3.154251 | 0.149459  |
| 54 | 6 | 0 | 1.364403  | -0.621134 | -0.205904 |
| 55 | 6 | 0 | 1.510057  | -3.154229 | -0.149502 |
| 56 | 6 | 0 | -0.623061 | -4.381162 | 0.453581  |
| 57 | 1 | 0 | -2.324107 | -3.072187 | 0.879905  |
| 58 | 1 | 0 | -1.997239 | -3.309161 | -0.827032 |
| 59 | 6 | 0 | 0.623117  | -4.381156 | -0.453616 |
| 60 | 1 | 0 | 2.324145  | -3.072160 | -0.879946 |
| 61 | 1 | 0 | 1.997273  | -3.309122 | 0.826992  |
| 62 | 1 | 0 | -0.304379 | -4.367533 | 1.507200  |
| 63 | 1 | 0 | -1.209857 | -5.298158 | 0.305697  |
| 64 | 1 | 0 | 0.304434  | -4.367540 | -1.507234 |
| 65 | 1 | 0 | 1.209926  | -5.298142 | -0.305724 |
| 66 | 6 | 0 | -9.611604 | 0.238108  | -0.547039 |
| 67 | 6 | 0 | -9.007621 | 1.474137  | -0.542422 |

|    |    |   |            |           |           |
|----|----|---|------------|-----------|-----------|
| 68 | 6  | 0 | -7.571050  | 1.509981  | -0.265521 |
| 69 | 6  | 0 | -9.801747  | 2.759850  | -0.767160 |
| 70 | 6  | 0 | -6.938489  | 0.306096  | -0.001255 |
| 71 | 6  | 0 | -6.794115  | 2.823928  | -0.325584 |
| 72 | 6  | 0 | -8.905574  | 3.946691  | -1.185792 |
| 73 | 1  | 0 | -10.588110 | 2.587476  | -1.513781 |
| 74 | 1  | 0 | -10.313635 | 3.028393  | 0.170713  |
| 75 | 6  | 0 | -7.703565  | 4.069291  | -0.226695 |
| 76 | 1  | 0 | -6.026487  | 2.841474  | 0.457851  |
| 77 | 1  | 0 | -6.247927  | 2.864362  | -1.281984 |
| 78 | 1  | 0 | -8.539192  | 3.801302  | -2.213344 |
| 79 | 1  | 0 | -9.498183  | 4.871950  | -1.180654 |
| 80 | 1  | 0 | -8.074712  | 4.186259  | 0.803107  |
| 81 | 1  | 0 | -7.114002  | 4.966451  | -0.460322 |
| 82 | 1  | 0 | -10.665292 | 0.062680  | -0.735561 |
| 83 | 52 | 0 | -8.298661  | -1.306892 | -0.121099 |
| 84 | 52 | 0 | -4.116769  | -0.251368 | -1.249140 |
| 85 | 52 | 0 | -0.000017  | 0.970622  | -0.000058 |
| 86 | 52 | 0 | 4.116732   | -0.251259 | 1.249135  |
| 87 | 52 | 0 | 8.298616   | -1.306936 | 0.121160  |

# ----- **Optimization of 6CHX**

## **6CHO**

| Center | Atomic | Atomic | Coordinates (Angstroms) |   |   |
|--------|--------|--------|-------------------------|---|---|
| Number | Number | Type   | X                       | Y | Z |

|    |   |   |           |           |           |
|----|---|---|-----------|-----------|-----------|
| 1  | 6 | 0 | 6.376029  | 1.022184  | -0.143374 |
| 2  | 6 | 0 | 5.827554  | 2.263395  | -0.429281 |
| 3  | 6 | 0 | 4.395436  | 2.097042  | -0.481118 |
| 4  | 6 | 0 | 4.125216  | 0.761035  | -0.218689 |
| 5  | 6 | 0 | 5.497794  | 4.753170  | -0.599498 |
| 6  | 1 | 0 | 5.238712  | 4.945351  | 0.453020  |
| 7  | 1 | 0 | 5.964296  | 5.668275  | -0.988771 |
| 8  | 6 | 0 | 4.204249  | 4.436536  | -1.386904 |
| 9  | 1 | 0 | 4.466278  | 4.211934  | -2.432143 |
| 10 | 1 | 0 | 3.544567  | 5.314875  | -1.401457 |
| 11 | 6 | 0 | 6.513093  | 3.585370  | -0.681923 |
| 12 | 1 | 0 | 7.337422  | 3.733482  | 0.025678  |
| 13 | 1 | 0 | 6.974312  | 3.573750  | -1.681296 |
| 14 | 6 | 0 | 3.445232  | 3.234967  | -0.769627 |
| 15 | 1 | 0 | 2.636475  | 2.901927  | -1.431020 |
| 16 | 1 | 0 | 2.959641  | 3.555480  | 0.165071  |
| 17 | 8 | 0 | 5.340404  | 0.074504  | -0.007193 |
| 18 | 6 | 0 | 7.718785  | 0.540978  | 0.028258  |
| 19 | 6 | 0 | 8.273523  | -0.670973 | 0.409369  |
| 20 | 8 | 0 | 8.752208  | 1.462560  | -0.238462 |
| 21 | 6 | 0 | 9.713881  | -0.503835 | 0.378629  |
| 22 | 6 | 0 | 7.606512  | -1.975735 | 0.776295  |
| 23 | 6 | 0 | 9.962543  | 0.789262  | -0.014421 |
| 24 | 6 | 0 | 10.676872 | -1.605109 | 0.759884  |
| 25 | 6 | 0 | 8.609809  | -2.926224 | 1.478555  |
| 26 | 1 | 0 | 6.730824  | -1.796861 | 1.411491  |
| 27 | 1 | 0 | 7.225495  | -2.462926 | -0.134778 |
| 28 | 1 | 0 | 10.856360 | 1.369149  | -0.176999 |
| 29 | 6 | 0 | 9.964727  | -2.982375 | 0.732549  |

|    |   |   |           |           |           |
|----|---|---|-----------|-----------|-----------|
| 30 | 1 | 0 | 11.549180 | -1.611274 | 0.092639  |
| 31 | 1 | 0 | 11.060098 | -1.425946 | 1.776286  |
| 32 | 1 | 0 | 8.783992  | -2.584386 | 2.510346  |
| 33 | 1 | 0 | 8.172838  | -3.932031 | 1.542416  |
| 34 | 1 | 0 | 9.790194  | -3.289186 | -0.309848 |
| 35 | 1 | 0 | 10.616710 | -3.739709 | 1.188556  |
| 36 | 6 | 0 | -0.669767 | 0.254512  | -0.050781 |
| 37 | 6 | 0 | -1.222653 | 1.525680  | 0.030693  |
| 38 | 6 | 0 | -2.655148 | 1.374846  | -0.023033 |
| 39 | 6 | 0 | -2.924394 | 0.016814  | -0.128481 |
| 40 | 6 | 0 | -1.546580 | 3.958747  | 0.585081  |
| 41 | 1 | 0 | -1.775068 | 3.839779  | 1.655304  |
| 42 | 1 | 0 | -1.088085 | 4.949317  | 0.461446  |
| 43 | 6 | 0 | -2.862836 | 3.874587  | -0.223599 |
| 44 | 1 | 0 | -2.630647 | 3.958277  | -1.296364 |
| 45 | 1 | 0 | -3.518976 | 4.718059  | 0.031056  |
| 46 | 6 | 0 | -0.539287 | 2.867943  | 0.142267  |
| 47 | 1 | 0 | 0.306650  | 2.811871  | 0.837823  |
| 48 | 1 | 0 | -0.110913 | 3.145252  | -0.833220 |
| 49 | 6 | 0 | -3.609033 | 2.543813  | 0.046470  |
| 50 | 1 | 0 | -4.435351 | 2.408460  | -0.661592 |
| 51 | 1 | 0 | -4.069671 | 2.583629  | 1.045598  |
| 52 | 8 | 0 | -1.707311 | -0.697095 | -0.148676 |
| 53 | 6 | 0 | 0.669765  | -0.254570 | -0.050783 |
| 54 | 6 | 0 | 1.222657  | -1.525735 | 0.030708  |
| 55 | 8 | 0 | 1.707307  | 0.697038  | -0.148693 |
| 56 | 6 | 0 | 2.655154  | -1.374895 | -0.023024 |
| 57 | 6 | 0 | 0.539298  | -2.867997 | 0.142337  |
| 58 | 6 | 0 | 2.924393  | -0.016862 | -0.128482 |

|    |   |   |            |           |           |
|----|---|---|------------|-----------|-----------|
| 59 | 6 | 0 | 3.609044   | -2.543856 | 0.046520  |
| 60 | 6 | 0 | 1.546600   | -3.958782 | 0.585180  |
| 61 | 1 | 0 | -0.306633  | -2.811901 | 0.837899  |
| 62 | 1 | 0 | 0.110914   | -3.145342 | -0.833134 |
| 63 | 6 | 0 | 2.862854   | -3.874640 | -0.223508 |
| 64 | 1 | 0 | 4.435359   | -2.408521 | -0.661545 |
| 65 | 1 | 0 | 4.069682   | -2.583638 | 1.045651  |
| 66 | 1 | 0 | 1.775095   | -3.839779 | 1.655398  |
| 67 | 1 | 0 | 1.088111   | -4.949359 | 0.461581  |
| 68 | 1 | 0 | 2.630664   | -3.958363 | -1.296271 |
| 69 | 1 | 0 | 3.519001   | -4.718098 | 0.031171  |
| 70 | 6 | 0 | -7.718790  | -0.540943 | 0.028266  |
| 71 | 6 | 0 | -8.273496  | 0.671024  | 0.409365  |
| 72 | 6 | 0 | -9.713859  | 0.503917  | 0.378649  |
| 73 | 6 | 0 | -9.962555  | -0.789175 | -0.014399 |
| 74 | 6 | 0 | -8.609722  | 2.926273  | 1.478579  |
| 75 | 1 | 0 | -8.783900  | 2.584432  | 2.510370  |
| 76 | 1 | 0 | -8.172731  | 3.932072  | 1.542443  |
| 77 | 6 | 0 | -9.964647  | 2.982456  | 0.732591  |
| 78 | 1 | 0 | -9.790123  | 3.289270  | -0.309807 |
| 79 | 1 | 0 | -10.616610 | 3.739798  | 1.188612  |
| 80 | 6 | 0 | -7.606451  | 1.975767  | 0.776300  |
| 81 | 1 | 0 | -6.730760  | 1.796867  | 1.411486  |
| 82 | 1 | 0 | -7.225431  | 2.462959  | -0.134771 |
| 83 | 6 | 0 | -10.676820 | 1.605206  | 0.759931  |
| 84 | 1 | 0 | -11.549136 | 1.611395  | 0.092698  |
| 85 | 1 | 0 | -11.060036 | 1.426043  | 1.776337  |
| 86 | 8 | 0 | -8.752238  | -1.462504 | -0.238437 |
| 87 | 6 | 0 | -6.376042  | -1.022180 | -0.143372 |



|     |   |   |            |           |           |
|-----|---|---|------------|-----------|-----------|
| 88  | 6 | 0 | -5.827590  | -2.263403 | -0.429270 |
| 89  | 8 | 0 | -5.340401  | -0.074521 | -0.007188 |
| 90  | 6 | 0 | -4.395468  | -2.097071 | -0.481121 |
| 91  | 6 | 0 | -6.513151  | -3.585364 | -0.681925 |
| 92  | 6 | 0 | -4.125225  | -0.761071 | -0.218687 |
| 93  | 6 | 0 | -3.445286  | -3.235004 | -0.769673 |
| 94  | 6 | 0 | -5.497868  | -4.753177 | -0.599534 |
| 95  | 1 | 0 | -7.337471  | -3.733477 | 0.025684  |
| 96  | 1 | 0 | -6.974381  | -3.573716 | -1.681295 |
| 97  | 6 | 0 | -4.204334  | -4.436550 | -1.386959 |
| 98  | 1 | 0 | -2.636535  | -2.901961 | -1.431074 |
| 99  | 1 | 0 | -2.959684  | -3.555545 | 0.165007  |
| 100 | 1 | 0 | -5.238771  | -4.945380 | 0.452977  |
| 101 | 1 | 0 | -5.964391  | -5.668268 | -0.988814 |
| 102 | 1 | 0 | -4.466382  | -4.211923 | -2.432189 |
| 103 | 1 | 0 | -3.544668  | -5.314901 | -1.401545 |
| 104 | 1 | 0 | -10.856388 | -1.369039 | -0.176972 |

## 6CHS

| Center | Atomic | Atomic | Coordinates (Angstroms) |   |   |
|--------|--------|--------|-------------------------|---|---|
| Number | Number | Type   | X                       | Y | Z |

|   |   |   |           |           |           |
|---|---|---|-----------|-----------|-----------|
| 1 | 6 | 0 | -7.182911 | -0.421828 | -0.138504 |
| 2 | 6 | 0 | -6.652170 | -1.656228 | 0.205869  |
| 3 | 6 | 0 | -5.210878 | -1.736906 | 0.076268  |
| 4 | 6 | 0 | -4.618583 | -0.572875 | -0.392484 |
| 5 | 6 | 0 | -6.623424 | -3.922315 | 1.363925  |
| 6 | 1 | 0 | -6.319260 | -3.572967 | 2.362317  |

S129

|    |   |   |            |           |           |
|----|---|---|------------|-----------|-----------|
| 7  | 1 | 0 | -7.226029  | -4.829252 | 1.508881  |
| 8  | 6 | 0 | -5.363882  | -4.236876 | 0.529674  |
| 9  | 1 | 0 | -5.667108  | -4.550648 | -0.480711 |
| 10 | 1 | 0 | -4.806315  | -5.072714 | 0.973647  |
| 11 | 6 | 0 | -7.483212  | -2.846337 | 0.662397  |
| 12 | 1 | 0 | -8.296720  | -2.509269 | 1.317427  |
| 13 | 1 | 0 | -7.967969  | -3.306191 | -0.212117 |
| 14 | 6 | 0 | -4.443738  | -2.997481 | 0.448389  |
| 15 | 1 | 0 | -3.625775  | -3.165583 | -0.263627 |
| 16 | 1 | 0 | -3.967208  | -2.855003 | 1.430149  |
| 17 | 6 | 0 | -8.571808  | 0.018228  | -0.186060 |
| 18 | 6 | 0 | -9.155035  | 1.172837  | 0.315228  |
| 19 | 6 | 0 | -10.573791 | 1.287031  | 0.022429  |
| 20 | 6 | 0 | -8.419181  | 2.250000  | 1.097959  |
| 21 | 6 | 0 | -11.059980 | 0.233021  | -0.714966 |
| 22 | 6 | 0 | -11.422303 | 2.437203  | 0.543211  |
| 23 | 6 | 0 | -9.392105  | 3.150018  | 1.895925  |
| 24 | 1 | 0 | -7.675500  | 1.794737  | 1.764160  |
| 25 | 1 | 0 | -7.853462  | 2.884399  | 0.398686  |
| 26 | 1 | 0 | -12.072680 | 0.063280  | -1.053965 |
| 27 | 6 | 0 | -10.554523 | 3.633132  | 1.001124  |
| 28 | 1 | 0 | -12.142495 | 2.755913  | -0.222219 |
| 29 | 1 | 0 | -12.014358 | 2.086154  | 1.402759  |
| 30 | 1 | 0 | -9.801197  | 2.595454  | 2.754159  |
| 31 | 1 | 0 | -8.839485  | 4.008731  | 2.300745  |
| 32 | 1 | 0 | -10.143085 | 4.157306  | 0.125376  |
| 33 | 1 | 0 | -11.182316 | 4.353212  | 1.543558  |
| 34 | 6 | 0 | 0.680704   | 0.137214  | 0.260117  |
| 35 | 6 | 0 | 1.159209   | 0.547918  | 1.496569  |

|    |   |   |           |           |           |
|----|---|---|-----------|-----------|-----------|
| 36 | 6 | 0 | 2.581297  | 0.337796  | 1.679752  |
| 37 | 6 | 0 | 3.209810  | -0.259695 | 0.596450  |
| 38 | 6 | 0 | 1.132036  | 1.883813  | 3.663527  |
| 39 | 1 | 0 | 1.522173  | 2.829678  | 3.257987  |
| 40 | 1 | 0 | 0.487584  | 2.139275  | 4.515613  |
| 41 | 6 | 0 | 2.312191  | 1.001818  | 4.122077  |
| 42 | 1 | 0 | 1.924380  | 0.040948  | 4.493058  |
| 43 | 1 | 0 | 2.847943  | 1.476987  | 4.955001  |
| 44 | 6 | 0 | 0.292297  | 1.151260  | 2.592362  |
| 45 | 1 | 0 | -0.454650 | 1.825590  | 2.154597  |
| 46 | 1 | 0 | -0.275928 | 0.349161  | 3.087282  |
| 47 | 6 | 0 | 3.295931  | 0.763698  | 2.954073  |
| 48 | 1 | 0 | 4.053867  | 0.019090  | 3.228531  |
| 49 | 1 | 0 | 3.843867  | 1.699535  | 2.766631  |
| 50 | 6 | 0 | -0.680704 | 0.137214  | -0.260118 |
| 51 | 6 | 0 | -1.159209 | 0.547916  | -1.496570 |
| 52 | 6 | 0 | -2.581297 | 0.337794  | -1.679753 |
| 53 | 6 | 0 | -0.292297 | 1.151256  | -2.592364 |
| 54 | 6 | 0 | -3.209810 | -0.259696 | -0.596451 |
| 55 | 6 | 0 | -3.295931 | 0.763693  | -2.954075 |
| 56 | 6 | 0 | -1.132036 | 1.883807  | -3.663531 |
| 57 | 1 | 0 | 0.454650  | 1.825586  | -2.154600 |
| 58 | 1 | 0 | 0.275928  | 0.349156  | -3.087283 |
| 59 | 6 | 0 | -2.312191 | 1.001811  | -4.122079 |
| 60 | 1 | 0 | -4.053867 | 0.019084  | -3.228532 |
| 61 | 1 | 0 | -3.843867 | 1.699531  | -2.766635 |
| 62 | 1 | 0 | -1.522173 | 2.829672  | -3.257993 |
| 63 | 1 | 0 | -0.487584 | 2.139267  | -4.515617 |
| 64 | 1 | 0 | -1.924380 | 0.040940  | -4.493059 |

|    |   |   |           |           |           |
|----|---|---|-----------|-----------|-----------|
| 65 | 1 | 0 | -2.847943 | 1.476979  | -4.955004 |
| 66 | 6 | 0 | 8.571808  | 0.018228  | 0.186060  |
| 67 | 6 | 0 | 9.155035  | 1.172836  | -0.315229 |
| 68 | 6 | 0 | 10.573791 | 1.287030  | -0.022429 |
| 69 | 6 | 0 | 11.059980 | 0.233021  | 0.714967  |
| 70 | 6 | 0 | 9.392106  | 3.150016  | -1.895927 |
| 71 | 1 | 0 | 9.801198  | 2.595451  | -2.754161 |
| 72 | 1 | 0 | 8.839486  | 4.008729  | -2.300749 |
| 73 | 6 | 0 | 10.554524 | 3.633131  | -1.001127 |
| 74 | 1 | 0 | 10.143085 | 4.157305  | -0.125380 |
| 75 | 1 | 0 | 11.182316 | 4.353210  | -1.543562 |
| 76 | 6 | 0 | 8.419182  | 2.249999  | -1.097961 |
| 77 | 1 | 0 | 7.675500  | 1.794735  | -1.764161 |
| 78 | 1 | 0 | 7.853462  | 2.884399  | -0.398688 |
| 79 | 6 | 0 | 11.422303 | 2.437202  | -0.543212 |
| 80 | 1 | 0 | 12.142495 | 2.755913  | 0.222217  |
| 81 | 1 | 0 | 12.014359 | 2.086153  | -1.402760 |
| 82 | 6 | 0 | 7.182911  | -0.421828 | 0.138504  |
| 83 | 6 | 0 | 6.652170  | -1.656229 | -0.205868 |
| 84 | 6 | 0 | 5.210878  | -1.736906 | -0.076267 |
| 85 | 6 | 0 | 7.483212  | -2.846337 | -0.662394 |
| 86 | 6 | 0 | 4.618583  | -0.572875 | 0.392484  |
| 87 | 6 | 0 | 4.443738  | -2.997482 | -0.448387 |
| 88 | 6 | 0 | 6.623424  | -3.922316 | -1.363921 |
| 89 | 1 | 0 | 8.296720  | -2.509270 | -1.317424 |
| 90 | 1 | 0 | 7.967968  | -3.306191 | 0.212120  |
| 91 | 6 | 0 | 5.363882  | -4.236876 | -0.529670 |
| 92 | 1 | 0 | 3.625774  | -3.165583 | 0.263630  |
| 93 | 1 | 0 | 3.967208  | -2.855004 | -1.430146 |

|     |    |   |           |           |           |
|-----|----|---|-----------|-----------|-----------|
| 94  | 1  | 0 | 6.319260  | -3.572969 | -2.362313 |
| 95  | 1  | 0 | 7.226029  | -4.829253 | -1.508876 |
| 96  | 1  | 0 | 5.667108  | -4.550648 | 0.480715  |
| 97  | 1  | 0 | 4.806315  | -5.072715 | -0.973642 |
| 98  | 1  | 0 | 12.072679 | 0.063280  | 1.053967  |
| 99  | 16 | 0 | 9.802184  | -0.976439 | 1.094627  |
| 100 | 16 | 0 | 5.870931  | 0.712241  | 0.676545  |
| 101 | 16 | 0 | 2.021225  | -0.569824 | -0.741439 |
| 102 | 16 | 0 | -2.021225 | -0.569823 | 0.741440  |
| 103 | 16 | 0 | -5.870931 | 0.712240  | -0.676545 |
| 104 | 16 | 0 | -9.802184 | -0.976440 | -1.094626 |

# 6CHSe

| Center<br>Number | Atomic<br>Number | Atomic<br>Type | Coordinates (Angstroms) |           |           |
|------------------|------------------|----------------|-------------------------|-----------|-----------|
|                  |                  |                | X                       | Y         | Z         |
| 1                | 6                | 0              | -7.319237               | 0.239568  | -0.374452 |
| 2                | 6                | 0              | -6.711884               | 0.472442  | -1.597778 |
| 3                | 6                | 0              | -5.268909               | 0.648773  | -1.562527 |
| 4                | 6                | 0              | -4.687717               | 0.599129  | -0.305589 |
| 5                | 6                | 0              | -6.589307               | 0.397488  | -4.145613 |
| 6                | 1                | 0              | -6.274827               | -0.652816 | -4.243857 |
| 7                | 1                | 0              | -7.162612               | 0.648800  | -5.048376 |
| 8                | 6                | 0              | -5.338807               | 1.293717  | -4.030484 |
| 9                | 1                | 0              | -5.653596               | 2.339997  | -3.896950 |
| 10               | 1                | 0              | -4.746219               | 1.250100  | -4.954436 |
| 11               | 6                | 0              | -7.492502               | 0.568630  | -2.903632 |

S133

|    |   |   |            |           |           |
|----|---|---|------------|-----------|-----------|
| 12 | 1 | 0 | -8.307062  | -0.166615 | -2.907447 |
| 13 | 1 | 0 | -7.975732  | 1.556749  | -2.961418 |
| 14 | 6 | 0 | -4.461214  | 0.845900  | -2.840349 |
| 15 | 1 | 0 | -3.648115  | 1.561074  | -2.662802 |
| 16 | 1 | 0 | -3.975042  | -0.105475 | -3.108468 |
| 17 | 6 | 0 | -8.739988  | 0.075824  | -0.071170 |
| 18 | 6 | 0 | -9.396834  | -1.025122 | 0.454154  |
| 19 | 6 | 0 | -10.823001 | -0.848331 | 0.692015  |
| 20 | 6 | 0 | -8.698053  | -2.336893 | 0.790595  |
| 21 | 6 | 0 | -11.307022 | 0.402141  | 0.387080  |
| 22 | 6 | 0 | -11.704607 | -1.990767 | 1.182934  |
| 23 | 6 | 0 | -9.691567  | -3.514746 | 0.916983  |
| 24 | 1 | 0 | -7.926095  | -2.555409 | 0.041992  |
| 25 | 1 | 0 | -8.168518  | -2.226156 | 1.750177  |
| 26 | 1 | 0 | -12.330710 | 0.745681  | 0.475943  |
| 27 | 6 | 0 | -10.881287 | -3.132113 | 1.823525  |
| 28 | 1 | 0 | -12.453961 | -1.612964 | 1.891258  |
| 29 | 1 | 0 | -12.262624 | -2.403103 | 0.327495  |
| 30 | 1 | 0 | -10.069758 | -3.798408 | -0.077067 |
| 31 | 1 | 0 | -9.165809  | -4.389277 | 1.323870  |
| 32 | 1 | 0 | -10.500626 | -2.817232 | 2.807027  |
| 33 | 1 | 0 | -11.531565 | -4.001556 | 1.991544  |
| 34 | 6 | 0 | 0.690791   | -0.239677 | 0.500523  |
| 35 | 6 | 0 | 1.208814   | -1.396772 | 1.059246  |
| 36 | 6 | 0 | 2.626747   | -1.627048 | 0.832776  |
| 37 | 6 | 0 | 3.272465   | -0.680830 | 0.053362  |
| 38 | 6 | 0 | 1.208176   | -3.341453 | 2.711335  |
| 39 | 1 | 0 | 1.619966   | -2.796798 | 3.574738  |
| 40 | 1 | 0 | 0.567427   | -4.140200 | 3.109072  |

|    |   |   |           |           |           |
|----|---|---|-----------|-----------|-----------|
| 41 | 6 | 0 | 2.367768  | -3.937031 | 1.886026  |
| 42 | 1 | 0 | 1.957756  | -4.452370 | 1.003963  |
| 43 | 1 | 0 | 2.914171  | -4.687353 | 2.473529  |
| 44 | 6 | 0 | 0.356994  | -2.391437 | 1.839543  |
| 45 | 1 | 0 | -0.380179 | -1.854956 | 2.450194  |
| 46 | 1 | 0 | -0.223759 | -3.001261 | 1.129418  |
| 47 | 6 | 0 | 3.344796  | -2.823984 | 1.445811  |
| 48 | 1 | 0 | 4.090851  | -3.213993 | 0.741973  |
| 49 | 1 | 0 | 3.908779  | -2.489627 | 2.330955  |
| 50 | 6 | 0 | -0.690791 | 0.239677  | 0.500522  |
| 51 | 6 | 0 | -1.208815 | 1.396772  | 1.059245  |
| 52 | 6 | 0 | -2.626747 | 1.627048  | 0.832774  |
| 53 | 6 | 0 | -0.356995 | 2.391437  | 1.839543  |
| 54 | 6 | 0 | -3.272465 | 0.680830  | 0.053361  |
| 55 | 6 | 0 | -3.344796 | 2.823983  | 1.445809  |
| 56 | 6 | 0 | -1.208177 | 3.341453  | 2.711334  |
| 57 | 1 | 0 | 0.380178  | 1.854956  | 2.450193  |
| 58 | 1 | 0 | 0.223758  | 3.001260  | 1.129418  |
| 59 | 6 | 0 | -2.367769 | 3.937030  | 1.886025  |
| 60 | 1 | 0 | -4.090851 | 3.213992  | 0.741971  |
| 61 | 1 | 0 | -3.908780 | 2.489627  | 2.330953  |
| 62 | 1 | 0 | -1.619967 | 2.796798  | 3.574737  |
| 63 | 1 | 0 | -0.567429 | 4.140199  | 3.109071  |
| 64 | 1 | 0 | -1.957757 | 4.452370  | 1.003962  |
| 65 | 1 | 0 | -2.914172 | 4.687353  | 2.473528  |
| 66 | 6 | 0 | 8.739988  | -0.075824 | -0.071165 |
| 67 | 6 | 0 | 9.396834  | 1.025120  | 0.454165  |
| 68 | 6 | 0 | 10.823001 | 0.848328  | 0.692026  |
| 69 | 6 | 0 | 11.307022 | -0.402142 | 0.387084  |

|    |   |   |           |           |           |
|----|---|---|-----------|-----------|-----------|
| 70 | 6 | 0 | 9.691566  | 3.514741  | 0.917007  |
| 71 | 1 | 0 | 10.069757 | 3.798408  | -0.077041 |
| 72 | 1 | 0 | 9.165807  | 4.389270  | 1.323899  |
| 73 | 6 | 0 | 10.881286 | 3.132104  | 1.823547  |
| 74 | 1 | 0 | 10.500625 | 2.817218  | 2.807048  |
| 75 | 1 | 0 | 11.531564 | 4.001546  | 1.991571  |
| 76 | 6 | 0 | 8.698052  | 2.336889  | 0.790613  |
| 77 | 1 | 0 | 7.926095  | 2.555408  | 0.042012  |
| 78 | 1 | 0 | 8.168517  | 2.226146  | 1.750195  |
| 79 | 6 | 0 | 11.704607 | 1.990761  | 1.182951  |
| 80 | 1 | 0 | 12.453960 | 1.612955  | 1.891273  |
| 81 | 1 | 0 | 12.262624 | 2.403102  | 0.327514  |
| 82 | 6 | 0 | 7.319237  | -0.239567 | -0.374447 |
| 83 | 6 | 0 | 6.711885  | -0.472439 | -1.597775 |
| 84 | 6 | 0 | 5.268910  | -0.648770 | -1.562524 |
| 85 | 6 | 0 | 7.492503  | -0.568624 | -2.903628 |
| 86 | 6 | 0 | 4.687717  | -0.599129 | -0.305587 |
| 87 | 6 | 0 | 4.461215  | -0.845895 | -2.840347 |
| 88 | 6 | 0 | 6.589309  | -0.397478 | -4.145609 |
| 89 | 1 | 0 | 8.307063  | 0.166621  | -2.907442 |
| 90 | 1 | 0 | 7.975733  | -1.556742 | -2.961416 |
| 91 | 6 | 0 | 5.338808  | -1.293708 | -4.030483 |
| 92 | 1 | 0 | 3.648116  | -1.561069 | -2.662802 |
| 93 | 1 | 0 | 3.975042  | 0.105482  | -3.108464 |
| 94 | 1 | 0 | 6.274828  | 0.652826  | -4.243851 |
| 95 | 1 | 0 | 7.162614  | -0.648788 | -5.048372 |
| 96 | 1 | 0 | 5.653598  | -2.339988 | -3.896952 |
| 97 | 1 | 0 | 4.746220  | -1.250089 | -4.954435 |
| 98 | 1 | 0 | 12.330710 | -0.745682 | 0.475945  |



|     |    |   |           |           |           |
|-----|----|---|-----------|-----------|-----------|
| 99  | 34 | 0 | 9.963684  | -1.567790 | -0.286408 |
| 100 | 34 | 0 | 6.018528  | -0.261600 | 1.055238  |
| 101 | 34 | 0 | 2.053405  | 0.723477  | -0.475556 |
| 102 | 34 | 0 | -2.053405 | -0.723477 | -0.475557 |
| 103 | 34 | 0 | -6.018528 | 0.261598  | 1.055235  |
| 104 | 34 | 0 | -9.963683 | 1.567792  | -0.286405 |

## 6CHTe

| Center<br>Number | Atomic<br>Number | Atomic<br>Type | Coordinates (Angstroms) |          |           |
|------------------|------------------|----------------|-------------------------|----------|-----------|
|                  |                  |                | X                       | Y        | Z         |
| 1                | 6                | 0              | -7.574561               | 0.236362 | -0.328187 |
| 2                | 6                | 0              | -6.927427               | 1.138973 | -1.155564 |
| 3                | 6                | 0              | -5.482568               | 1.299491 | -0.996424 |
| 4                | 6                | 0              | -4.853551               | 0.561006 | -0.007908 |
| 5                | 6                | 0              | -6.802631               | 2.578306 | -3.271847 |
| 6                | 1                | 0              | -6.467876               | 1.788841 | -3.962183 |
| 7                | 1                | 0              | -7.384808               | 3.298527 | -3.863021 |
| 8                | 6                | 0              | -5.570556               | 3.260082 | -2.644792 |
| 9                | 1                | 0              | -5.905656               | 4.031323 | -1.934332 |
| 10               | 1                | 0              | -4.974782               | 3.768204 | -3.415471 |
| 11               | 6                | 0              | -7.703045               | 1.976555 | -2.171076 |
| 12               | 1                | 0              | -8.507772               | 1.375687 | -2.611658 |
| 13               | 1                | 0              | -8.202368               | 2.802122 | -1.638184 |
| 14               | 6                | 0              | -4.687947               | 2.218593 | -1.922945 |
| 15               | 1                | 0              | -3.886473               | 2.711894 | -1.359694 |
| 16               | 1                | 0              | -4.183832               | 1.600576 | -2.683784 |

|    |   |   |            |           |           |
|----|---|---|------------|-----------|-----------|
| 17 | 6 | 0 | -9.007570  | -0.075895 | -0.305836 |
| 18 | 6 | 0 | -9.659375  | -1.076448 | -1.008217 |
| 19 | 6 | 0 | -11.103485 | -1.211125 | -0.812671 |
| 20 | 6 | 0 | -8.896850  | -2.045701 | -1.909863 |
| 21 | 6 | 0 | -11.695701 | -0.347395 | 0.079421  |
| 22 | 6 | 0 | -11.915955 | -2.236072 | -1.602307 |
| 23 | 6 | 0 | -9.814548  | -2.806019 | -2.893522 |
| 24 | 1 | 0 | -8.107106  | -1.510985 | -2.451828 |
| 25 | 1 | 0 | -8.378917  | -2.781715 | -1.273715 |
| 26 | 1 | 0 | -12.752991 | -0.333299 | 0.321353  |
| 27 | 6 | 0 | -11.043837 | -3.382350 | -2.161286 |
| 28 | 1 | 0 | -12.723616 | -2.635748 | -0.975048 |
| 29 | 1 | 0 | -12.400742 | -1.726662 | -2.450387 |
| 30 | 1 | 0 | -10.155474 | -2.129962 | -3.692681 |
| 31 | 1 | 0 | -9.240650  | -3.609783 | -3.374839 |
| 32 | 1 | 0 | -10.707598 | -4.036828 | -1.342858 |
| 33 | 1 | 0 | -11.644407 | -3.999244 | -2.843983 |
| 34 | 6 | 0 | 0.712320   | -0.175071 | 0.666877  |
| 35 | 6 | 0 | 1.335811   | -1.144321 | 1.434787  |
| 36 | 6 | 0 | 2.775675   | -1.333166 | 1.261864  |
| 37 | 6 | 0 | 3.423338   | -0.552466 | 0.319044  |
| 38 | 6 | 0 | 1.424075   | -2.717457 | 3.456112  |
| 39 | 1 | 0 | 1.780560   | -1.983233 | 4.194817  |
| 40 | 1 | 0 | 0.823160   | -3.458193 | 4.001336  |
| 41 | 6 | 0 | 2.636965   | -3.390233 | 2.783645  |
| 42 | 1 | 0 | 2.280977   | -4.105071 | 2.025923  |
| 43 | 1 | 0 | 3.219399   | -3.962366 | 3.518841  |
| 44 | 6 | 0 | 0.539111   | -2.022317 | 2.398627  |
| 45 | 1 | 0 | -0.247346  | -1.428234 | 2.879729  |

|    |   |   |           |           |           |
|----|---|---|-----------|-----------|-----------|
| 46 | 1 | 0 | 0.015586  | -2.798179 | 1.816465  |
| 47 | 6 | 0 | 3.546355  | -2.328148 | 2.128253  |
| 48 | 1 | 0 | 4.335906  | -2.804742 | 1.534609  |
| 49 | 1 | 0 | 4.064945  | -1.772065 | 2.926250  |
| 50 | 6 | 0 | -0.712321 | 0.175123  | 0.666867  |
| 51 | 6 | 0 | -1.335816 | 1.144407  | 1.434730  |
| 52 | 6 | 0 | -2.775681 | 1.333240  | 1.261795  |
| 53 | 6 | 0 | -0.539121 | 2.022449  | 2.398532  |
| 54 | 6 | 0 | -3.423339 | 0.552495  | 0.319010  |
| 55 | 6 | 0 | -3.546365 | 2.328259  | 2.128137  |
| 56 | 6 | 0 | -1.424090 | 2.717635  | 3.455983  |
| 57 | 1 | 0 | 0.247336  | 1.428390  | 2.879663  |
| 58 | 1 | 0 | -0.015597 | 2.798286  | 1.816336  |
| 59 | 6 | 0 | -2.636980 | 3.390377  | 2.783482  |
| 60 | 1 | 0 | -4.335916 | 2.804824  | 1.534469  |
| 61 | 1 | 0 | -4.064956 | 1.772211  | 2.926157  |
| 62 | 1 | 0 | -1.780574 | 1.983444  | 4.194721  |
| 63 | 1 | 0 | -0.823178 | 3.458397  | 4.001175  |
| 64 | 1 | 0 | -2.280992 | 4.105181  | 2.025730  |
| 65 | 1 | 0 | -3.219418 | 3.962541  | 3.518651  |
| 66 | 6 | 0 | 9.007572  | 0.075868  | -0.305829 |
| 67 | 6 | 0 | 9.659382  | 1.076393  | -1.008245 |
| 68 | 6 | 0 | 11.103493 | 1.211067  | -0.812706 |
| 69 | 6 | 0 | 11.695705 | 0.347363  | 0.079413  |
| 70 | 6 | 0 | 9.814564  | 2.805897  | -2.893610 |
| 71 | 1 | 0 | 10.155483 | 2.129810  | -3.692747 |
| 72 | 1 | 0 | 9.240670  | 3.609649  | -3.374955 |
| 73 | 6 | 0 | 11.043857 | 3.382246  | -2.161397 |
| 74 | 1 | 0 | 10.707625 | 4.036755  | -1.342992 |

|     |    |   |           |           |           |
|-----|----|---|-----------|-----------|-----------|
| 75  | 1  | 0 | 11.644430 | 3.999112  | -2.844117 |
| 76  | 6  | 0 | 8.896862  | 2.045621  | -1.909923 |
| 77  | 1  | 0 | 8.107112  | 1.510892  | -2.451867 |
| 78  | 1  | 0 | 8.378936  | 2.781661  | -1.273799 |
| 79  | 6  | 0 | 11.915969 | 2.235982  | -1.602380 |
| 80  | 1  | 0 | 12.723634 | 2.635674  | -0.975135 |
| 81  | 1  | 0 | 12.400752 | 1.726539  | -2.450442 |
| 82  | 6  | 0 | 7.574561  | -0.236380 | -0.328167 |
| 83  | 6  | 0 | 6.927421  | -1.139019 | -1.155509 |
| 84  | 6  | 0 | 5.482561  | -1.299523 | -0.996362 |
| 85  | 6  | 0 | 7.703034  | -1.976644 | -2.170990 |
| 86  | 6  | 0 | 4.853550  | -0.560997 | -0.007873 |
| 87  | 6  | 0 | 4.687934  | -2.218657 | -1.922846 |
| 88  | 6  | 0 | 6.802615  | -2.578436 | -3.271736 |
| 89  | 1  | 0 | 8.507762  | -1.375797 | -2.611598 |
| 90  | 1  | 0 | 8.202355  | -2.802192 | -1.638067 |
| 91  | 6  | 0 | 5.570537  | -3.260180 | -2.644652 |
| 92  | 1  | 0 | 3.886458  | -2.711930 | -1.359575 |
| 93  | 1  | 0 | 4.183823  | -1.600667 | -2.683709 |
| 94  | 1  | 0 | 6.467862  | -1.788996 | -3.962103 |
| 95  | 1  | 0 | 7.384787  | -3.298683 | -3.862881 |
| 96  | 1  | 0 | 5.905634  | -4.031393 | -1.934161 |
| 97  | 1  | 0 | 4.974759  | -3.768330 | -3.415309 |
| 98  | 1  | 0 | 12.752996 | 0.333268  | 0.321343  |
| 99  | 52 | 0 | 10.355604 | -0.985353 | 0.928116  |
| 100 | 52 | 0 | 6.225574  | 0.669581  | 1.011846  |
| 101 | 52 | 0 | 2.083385  | 0.774011  | -0.619982 |
| 102 | 52 | 0 | -2.083381 | -0.774020 | -0.619953 |
| 103 | 52 | 0 | -6.225567 | -0.669542 | 1.011859  |

104      52      0    -10.355607   0.985359   0.928076

-----

## Optimization of PCHXs

### PCHO

-----

| Center | Atomic | Atomic | Coordinates (Angstroms) |           |           |
|--------|--------|--------|-------------------------|-----------|-----------|
| Number | Number | Type   | X                       | Y         | Z         |
| -----  |        |        |                         |           |           |
| 1      | 6      | 0      | 0.646717                | 0.307432  | -0.021579 |
| 2      | 6      | 0      | 1.093598                | 1.620361  | -0.105912 |
| 3      | 6      | 0      | 2.533760                | 1.586048  | -0.093321 |
| 4      | 6      | 0      | 2.916281                | 0.253068  | -0.007748 |
| 5      | 6      | 0      | 1.201535                | 4.078559  | -0.639558 |
| 6      | 1      | 0      | 1.401102                | 3.988673  | -1.718378 |
| 7      | 1      | 0      | 0.668512                | 5.027083  | -0.488141 |
| 8      | 6      | 0      | 2.547257                | 4.094317  | 0.122459  |
| 9      | 1      | 0      | 2.346916                | 4.151843  | 1.203327  |
| 10     | 1      | 0      | 3.125213                | 4.988931  | -0.146551 |
| 11     | 6      | 0      | 0.302272                | 2.904989  | -0.176677 |
| 12     | 1      | 0      | -0.559813               | 2.788855  | -0.843012 |
| 13     | 1      | 0      | -0.110111               | 3.136350  | 0.817903  |
| 14     | 6      | 0      | 3.386772                | 2.829174  | -0.185099 |
| 15     | 1      | 0      | 4.244921                | 2.757093  | 0.492401  |
| 16     | 1      | 0      | 3.805761                | 2.911709  | -1.200194 |
| 17     | 8      | 0      | 1.761062                | -0.557065 | 0.038948  |
| 18     | 6      | 0      | -0.646612               | -0.308223 | 0.022626  |
| 19     | 6      | 0      | -1.093531               | -1.620967 | 0.109312  |

S141

|    |    |   |           |           |           |
|----|----|---|-----------|-----------|-----------|
| 20 | 8  | 0 | -1.760888 | 0.557509  | -0.019278 |
| 21 | 6  | 0 | -2.533600 | -1.584657 | 0.127878  |
| 22 | 6  | 0 | -0.302349 | -2.904645 | 0.196819  |
| 23 | 6  | 0 | -2.916049 | -0.251433 | 0.045628  |
| 24 | 6  | 0 | -3.386852 | -2.828908 | 0.201015  |
| 25 | 6  | 0 | -1.204246 | -4.126444 | -0.109368 |
| 26 | 1  | 0 | 0.556139  | -2.873984 | -0.483394 |
| 27 | 1  | 0 | 0.115265  | -3.009158 | 1.210474  |
| 28 | 6  | 0 | -2.544276 | -4.045956 | 0.658386  |
| 29 | 1  | 0 | -4.239118 | -2.671408 | 0.871464  |
| 30 | 1  | 0 | -3.814692 | -3.038286 | -0.791904 |
| 31 | 1  | 0 | -1.411605 | -4.172025 | -1.189481 |
| 32 | 1  | 0 | -0.669805 | -5.048857 | 0.155726  |
| 33 | 1  | 0 | -2.335983 | -3.967649 | 1.736457  |
| 34 | 1  | 0 | -3.123867 | -4.966931 | 0.507990  |
| 35 | -2 | 0 | 7.093984  | -0.173952 | -0.014740 |

-----

## PCHS

-----

| Center | Atomic | Atomic | Coordinates (Angstroms) |           |           |
|--------|--------|--------|-------------------------|-----------|-----------|
| Number | Number | Type   | X                       | Y         | Z         |
| 1      | 6      | 0      | 0.731291                | 1.113223  | 0.045753  |
| 2      | 6      | 0      | 1.323304                | 0.799033  | -1.166977 |
| 3      | 6      | 0      | 2.755013                | 0.765911  | -1.109738 |
| 4      | 6      | 0      | 3.259331                | 1.049537  | 0.150918  |
| 5      | 6      | 0      | 1.418906                | -0.412583 | -3.384593 |
| 6      | 1      | 0      | 1.559043                | -1.420387 | -2.970611 |

S142

|    |    |   |           |           |           |
|----|----|---|-----------|-----------|-----------|
| 7  | 1  | 0 | 0.889783  | -0.531744 | -4.336716 |
| 8  | 6  | 0 | 2.783529  | 0.245361  | -3.600831 |
| 9  | 1  | 0 | 2.632821  | 1.262018  | -3.988459 |
| 10 | 1  | 0 | 3.363713  | -0.295435 | -4.356776 |
| 11 | 6  | 0 | 0.566954  | 0.430630  | -2.425258 |
| 12 | 1  | 0 | -0.357061 | -0.094641 | -2.164392 |
| 13 | 1  | 0 | 0.255120  | 1.346231  | -2.947438 |
| 14 | 6  | 0 | 3.586595  | 0.304706  | -2.292342 |
| 15 | 1  | 0 | 4.459190  | 0.947935  | -2.427235 |
| 16 | 1  | 0 | 3.986461  | -0.695131 | -2.068704 |
| 17 | 6  | 0 | -0.685155 | 1.073272  | 0.399426  |
| 18 | 6  | 0 | -1.298897 | 0.347794  | 1.407838  |
| 19 | 6  | 0 | -2.730308 | 0.396156  | 1.353431  |
| 20 | 6  | 0 | -0.568094 | -0.499670 | 2.427126  |
| 21 | 6  | 0 | -3.212819 | 1.155519  | 0.297665  |
| 22 | 6  | 0 | -3.589194 | -0.444364 | 2.280073  |
| 23 | 6  | 0 | -1.460800 | -1.608916 | 3.001284  |
| 24 | 1  | 0 | 0.336615  | -0.923073 | 1.979899  |
| 25 | 1  | 0 | -0.224757 | 0.136541  | 3.255138  |
| 26 | 6  | 0 | -2.799481 | -1.027860 | 3.461818  |
| 27 | 1  | 0 | -4.435745 | 0.134824  | 2.655917  |
| 28 | 1  | 0 | -4.027946 | -1.267641 | 1.697595  |
| 29 | 1  | 0 | -1.638133 | -2.377538 | 2.236799  |
| 30 | 1  | 0 | -0.944523 | -2.101776 | 3.832705  |
| 31 | 1  | 0 | -2.610998 | -0.241168 | 4.204885  |
| 32 | 1  | 0 | -3.406933 | -1.791129 | 3.960760  |
| 33 | 16 | 0 | -1.885289 | 1.884637  | -0.583838 |
| 34 | 16 | 0 | 1.955283  | 1.443850  | 1.253197  |
| 35 | -2 | 0 | 7.849805  | -0.228699 | 0.332235  |

-----

**PCHSe**

-----

| Center<br>Number | Atomic<br>Number | Atomic<br>Type | Coordinates (Angstroms) |           |           |
|------------------|------------------|----------------|-------------------------|-----------|-----------|
|                  |                  |                | X                       | Y         | Z         |
| 1                | 6                | 0              | 0.752077                | 1.418775  | 0.013565  |
| 2                | 6                | 0              | 1.376510                | 0.815661  | -1.067996 |
| 3                | 6                | 0              | 2.828207                | 0.773174  | -1.015983 |
| 4                | 6                | 0              | 3.406583                | 1.355302  | 0.102459  |
| 5                | 6                | 0              | 1.437111                | -0.879753 | -2.973622 |
| 6                | 1                | 0              | 1.561599                | -1.778955 | -2.350839 |
| 7                | 1                | 0              | 0.898035                | -1.185969 | -3.880576 |
| 8                | 6                | 0              | 2.824273                | -0.311889 | -3.333403 |
| 9                | 1                | 0              | 2.695244                | 0.602569  | -3.932165 |
| 10               | 1                | 0              | 3.386167                | -1.024849 | -3.952311 |
| 11               | 6                | 0              | 0.605142                | 0.179304  | -2.217334 |
| 12               | 1                | 0              | -0.330488               | -0.253923 | -1.842792 |
| 13               | 1                | 0              | 0.313030                | 0.966077  | -2.930819 |
| 14               | 6                | 0              | 3.635477                | 0.002896  | -2.057001 |
| 15               | 1                | 0              | 4.547590                | 0.553218  | -2.314953 |
| 16               | 1                | 0              | 3.972608                | -0.945267 | -1.607471 |
| 17               | 6                | 0              | -0.683553               | 1.421019  | 0.300781  |
| 18               | 6                | 0              | -1.341415               | 0.631994  | 1.232330  |
| 19               | 6                | 0              | -2.793206               | 0.665799  | 1.175481  |
| 20               | 6                | 0              | -0.607280               | -0.264735 | 2.221647  |
| 21               | 6                | 0              | -3.337761               | 1.496056  | 0.206719  |
| 22               | 6                | 0              | -3.640553               | -0.272311 | 2.029847  |

S144



|    |    |   |           |           |           |
|----|----|---|-----------|-----------|-----------|
| 23 | 6  | 0 | -1.490114 | -1.420134 | 2.742417  |
| 24 | 1  | 0 | 0.310849  | -0.651983 | 1.762963  |
| 25 | 1  | 0 | -0.285283 | 0.342332  | 3.082692  |
| 26 | 6  | 0 | -2.855420 | -0.880898 | 3.212743  |
| 27 | 1  | 0 | -4.533038 | 0.247639  | 2.395880  |
| 28 | 1  | 0 | -4.008618 | -1.091419 | 1.390634  |
| 29 | 1  | 0 | -1.646655 | -2.165111 | 1.946958  |
| 30 | 1  | 0 | -0.972333 | -1.930774 | 3.565991  |
| 31 | 1  | 0 | -2.694119 | -0.117973 | 3.989578  |
| 32 | 1  | 0 | -3.452309 | -1.682879 | 3.668424  |
| 33 | 34 | 0 | 2.056454  | 2.141996  | 1.244254  |
| 34 | 34 | 0 | -1.946500 | 2.444513  | -0.746984 |
| 35 | -2 | 0 | 8.152083  | -0.215546 | 0.293617  |

# PCHTe

| Center<br>Number | Atomic<br>Number | Atomic<br>Type | Coordinates (Angstroms) |           |           |
|------------------|------------------|----------------|-------------------------|-----------|-----------|
|                  |                  |                | X                       | Y         | Z         |
| 1                | 6                | 0              | 0.763839                | 1.642374  | -0.013883 |
| 2                | 6                | 0              | 1.442531                | 0.843599  | -0.921810 |
| 3                | 6                | 0              | 2.900268                | 0.809864  | -0.847728 |
| 4                | 6                | 0              | 3.521026                | 1.593013  | 0.112713  |
| 5                | 6                | 0              | 1.529006                | -1.147223 | -2.537401 |
| 6                | 1                | 0              | 1.642792                | -1.941203 | -1.782926 |
| 7                | 1                | 0              | 0.999054                | -1.588859 | -3.392624 |
| 8                | 6                | 0              | 2.922203                | -0.644377 | -2.960886 |
| 9                | 1                | 0              | 2.806800                | 0.166454  | -3.696281 |

S145

|    |    |   |           |           |           |
|----|----|---|-----------|-----------|-----------|
| 10 | 1  | 0 | 3.492004  | -1.445608 | -3.451616 |
| 11 | 6  | 0 | 0.691943  | 0.016576  | -1.964591 |
| 12 | 1  | 0 | -0.248095 | -0.353284 | -1.538414 |
| 13 | 1  | 0 | 0.405205  | 0.680677  | -2.796141 |
| 14 | 6  | 0 | 3.708526  | -0.138699 | -1.732729 |
| 15 | 1  | 0 | 4.639480  | 0.348380  | -2.047383 |
| 16 | 1  | 0 | 4.013212  | -1.009465 | -1.129281 |
| 17 | 6  | 0 | -0.693902 | 1.663441  | 0.161045  |
| 18 | 6  | 0 | -1.407699 | 0.814209  | 0.993362  |
| 19 | 6  | 0 | -2.865651 | 0.848758  | 0.918514  |
| 20 | 6  | 0 | -0.694438 | -0.132187 | 1.958625  |
| 21 | 6  | 0 | -3.450935 | 1.745414  | 0.038408  |
| 22 | 6  | 0 | -3.713338 | -0.145627 | 1.710900  |
| 23 | 6  | 0 | -1.582401 | -1.298922 | 2.441653  |
| 24 | 1  | 0 | 0.224536  | -0.510994 | 1.495892  |
| 25 | 1  | 0 | -0.371830 | 0.447614  | 2.838642  |
| 26 | 6  | 0 | -2.956365 | -0.774271 | 2.899887  |
| 27 | 1  | 0 | -4.635066 | 0.339569  | 2.054074  |
| 28 | 1  | 0 | -4.032431 | -0.955008 | 1.033605  |
| 29 | 1  | 0 | -1.725676 | -2.028558 | 1.629574  |
| 30 | 1  | 0 | -1.074153 | -1.825022 | 3.261548  |
| 31 | 1  | 0 | -2.814243 | -0.027133 | 3.695639  |
| 32 | 1  | 0 | -3.560142 | -1.587717 | 3.325479  |
| 33 | 52 | 0 | -1.991620 | 2.899874  | -0.949313 |
| 34 | 52 | 0 | 2.109613  | 2.712128  | 1.206007  |
| 35 | -2 | 0 | 8.403868  | -0.197763 | 0.396558  |

-----

# Checkcif report provided by IUCr

10/13/23, 8:58 PM

checkCIF/PLATON report

No syntax errors found.  
Please wait while processing ....

[CIF dictionary](#)  
[Interpreting this report](#)

## Datablock: cptditms

---

|                 |                                                 |                    |
|-----------------|-------------------------------------------------|--------------------|
| Bond precision: | C-C = 0.0089 Å                                  | Wavelength=0.71073 |
| Cell:           | a=6.0030(4) b=13.0295(10) c=13.9564(10)         |                    |
|                 | alpha=101.251(4) beta=92.850(4) gamma=91.986(4) |                    |
| Temperature:    | 296 K                                           |                    |

  

|                | Calculated       | Reported         |
|----------------|------------------|------------------|
| Volume         | 1068.22(13)      | 1068.21(13)      |
| Space group    | P -1             | P -1             |
| Hall group     | -P 1             | -P 1             |
| Moiety formula | C17 H32 O2 S Si2 | C17 H32 O2 S Si2 |
| Sum formula    | C17 H32 O2 S Si2 | C17 H32 O2 S Si2 |
| Mr             | 356.67           | 356.67           |
| Dx, g cm-3     | 1.109            | 1.109            |
| Z              | 2                | 2                |
| Mu (mm-1)      | 0.268            | 0.268            |
| F000           | 388.0            | 388.0            |
| F000'          | 388.69           |                  |
| h,k,lmax       | 7,15,16          | 7,15,16          |
| Nref           | 3764             | 3764             |
| Tmin,Tmax      | 0.902,0.940      | 0.902,0.940      |
| Tmin'          | 0.889            |                  |

Correction method= # Reported T Limits: Tmin=0.902 Tmax=0.940  
AbsCorr = MULTI-SCAN  
Data completeness= 1.000 Theta(max)= 25.000  
R(reflections)= 0.0720 ( 2893) wR2(reflections)= 0.2104 ( 3764)  
S = 1.311 Npar= 207

---

The following ALERTS were generated. Each ALERT has the format  
**test-name\_ALERT\_alert-type\_alert-level**.  
Click on the hyperlinks for more details of the test.

### Alert level C

[ABSTY02 ALERT 1 C](#) An \_exptl\_absorpt\_correction\_type has been given without a literature citation. This should be contained in the \_exptl\_absorpt\_process\_details field.  
Absorption correction given as multi-scan  
[PLAT242 ALERT 2 C](#) Low 'MainMol' Ueq as Compared to Neighbors of Si1 Check  
[PLAT242 ALERT 2 C](#) Low 'MainMol' Ueq as Compared to Neighbors of Si2 Check  
[PLAT340 ALERT 3 C](#) Low Bond Precision on C-C Bonds ..... 0.00889 Å.

### Alert level G

[PLAT005 ALERT 5 G](#) No Embedded Refinement Details Found in the CIF Please Do !  
[PLAT066 ALERT 1 G](#) Predicted and Reported Tmin&Tmax Range Identical ? Check  
[PLAT093 ALERT 1 G](#) No s.u.'s on H-positions, Refinement Reported as mixed Check  
[PLAT154 ALERT 1 G](#) The s.u.'s on the Cell Angles are Equal ..(Note) 0.004 Degree  
[PLAT899 ALERT 4 G](#) SHELXL-97 is Deprecated and Succeeded by SHELXL 2019/3 Note

---

0 **ALERT level A** = Most likely a serious problem - resolve or explain  
0 **ALERT level B** = A potentially serious problem, consider carefully  
4 **ALERT level C** = Check. Ensure it is not caused by an omission or oversight  
5 **ALERT level G** = General information/check it is not something unexpected

4 **ALERT type 1** CIF construction/syntax error, inconsistent or missing data  
2 **ALERT type 2** Indicator that the structure model may be wrong or deficient  
1 **ALERT type 3** Indicator that the structure quality may be low  
1 **ALERT type 4** Improvement, methodology, query or suggestion  
1 **ALERT type 5** Informative message, check

---

It is advisable to attempt to resolve as many as possible of the alerts in all categories. Often the minor alerts point to easily fixed oversights, errors and omissions in your CIF or refinement strategy, so attention to these fine details can be worthwhile. In order to resolve some of the more serious problems it may be necessary to carry out additional measurements or structure refinements. However, the purpose of your study may justify the reported deviations and the more serious of these should normally be commented upon in the discussion or experimental section of a paper or in the "special\_details" fields of the CIF. checkCIF was carefully designed to identify outliers and unusual parameters, but every test has its limitations and alerts that are not important in a particular case may appear. Conversely, the absence of alerts does not guarantee there are no aspects of the results needing attention. It is up to the individual to critically assess their own results and, if necessary, seek expert advice.

#### **Publication of your CIF in IUCr journals**

A basic structural check has been run on your CIF. These basic checks will be run on all CIFs submitted for publication in IUCr journals (*Acta Crystallographica*, *Journal of Applied Crystallography*, *Journal of Synchrotron Radiation*); however, if you intend to submit to *Acta Crystallographica Section C* or *E* or *IUCrData*, you should make sure that [full publication checks](#) are run on the final version of your CIF prior to submission.

#### **Publication of your CIF in other journals**

Please refer to the *Notes for Authors* of the relevant journal for any special instructions relating to CIF submission.

---

# Datablock cptditms - ellipsoid plot

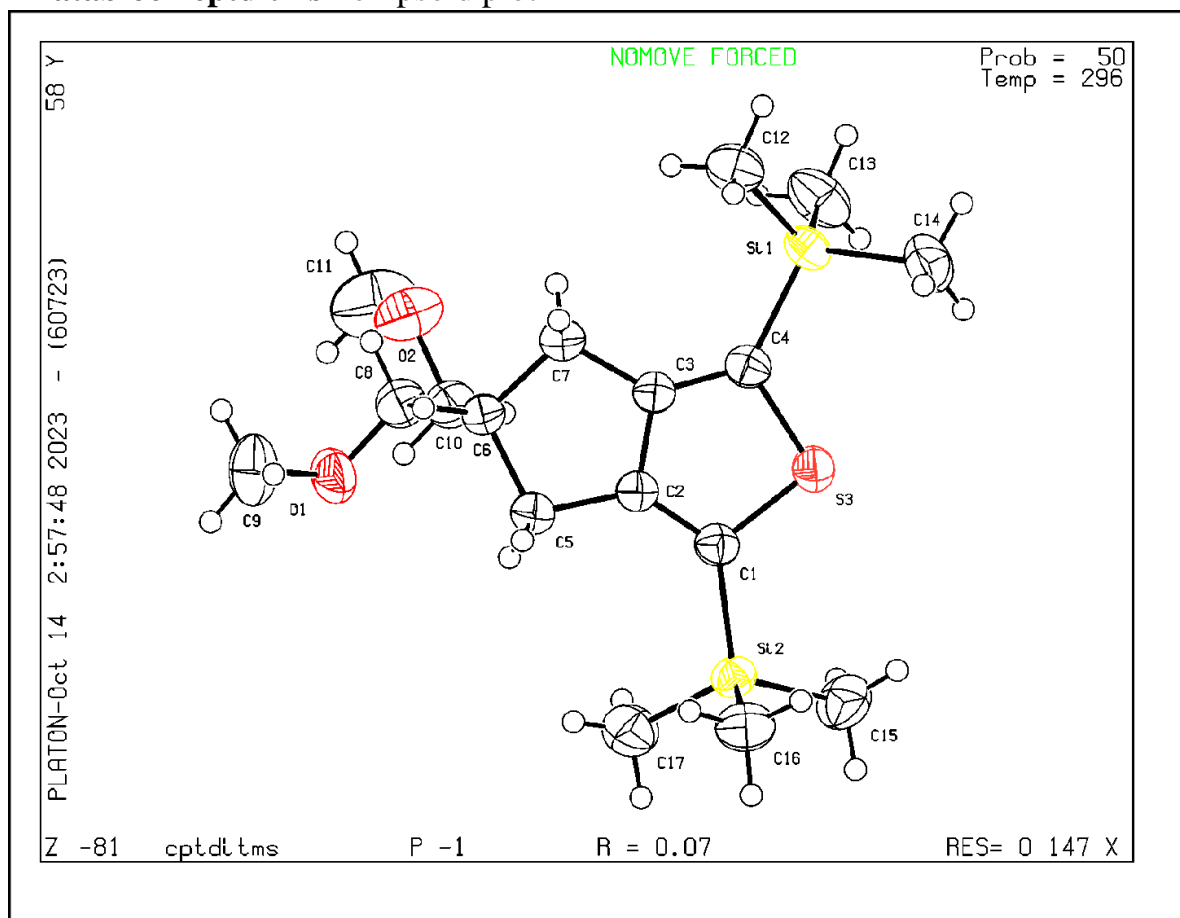

[Download CIF editor \(publCIF\) from the IUCr](#)  
[Download CIF editor \(enCIFer\) from the CCD](#)  
[Test a new CIF entry](#)
